# Supplementary material for: The controllable C2 arylation and C3 diazenylation of indoles with aryltriazenes under ambient conditions
Source: Royal Society of Chemistry journal article supplement (doi:10.1039/c9nj01728c), 2019-01-01

## Supporting Information

### **Controllable C2 arylation and C3 diazenylation of indoles with arytriazenes under ambient conditions**

Yonghong Liu<sup>a</sup>, Xia Ma<sup>a</sup>, Gengxin Wu<sup>a</sup>, Ziran Liu<sup>a</sup>, Xiang Yang<sup>a</sup>, Bin Wang<sup>b</sup>, Chenjiang Liu<sup>a\*</sup>,  
Yonghong Zhang<sup>a\*</sup> and Yan Huang<sup>a\*</sup>

<sup>a</sup> Key Laboratory of Oil and Gas Fine Chemicals, Ministry of Education & Xinjiang Uygur Autonomous Region,  
College of Chemistry and Chemical Engineering of Xinjiang University, Urumqi 830046, China

<sup>b</sup> Physics and Chemistry Detecting Center, Xinjiang University, Urumqi, 830046, China

E-mail: pxylcj@126.com; zhzhzyh@126.com; xjuchem\_2012@163.com

*Table of Contents*

|                                                                                                                       |           |
|-----------------------------------------------------------------------------------------------------------------------|-----------|
| <b>I. General Information .....</b>                                                                                   | <b>3</b>  |
| <b>II. Optimization of C2 Arylation and C3 Diazenylation of Indole .....</b>                                          | <b>4</b>  |
| <b>III. The Synthetic Procedure for selective C2 Arylation and C3 Diazenylation of<br/>1-substituted indole. ....</b> | <b>8</b>  |
| <b>IV. Gram-Scale experiments and Late-Stage Modification of Drugs .....</b>                                          | <b>10</b> |
| <b>V. <i>N</i>-debenzylation of <i>N</i>-benzylated products .....</b>                                                | <b>12</b> |
| <b>VI. ILs Recycling Experiment .....</b>                                                                             | <b>12</b> |
| <b>VII. The data for C2 Arylation and C3 Diazenylation of 1-substituted indole ....</b>                               | <b>15</b> |
| <b>VIII. References .....</b>                                                                                         | <b>24</b> |
| <b>IX. Copies of <sup>1</sup>H NMR and <sup>13</sup>C NMR .....</b>                                                   | <b>25</b> |

## **I. General Information**

Unless otherwise noted, all reagents and solvents were purchased from commercial sources (Adamas-beta, Alfa Aesar) and used without further purification.

### **NMR spectrum**

$^1\text{H}$  and  $^{13}\text{C}$  NMR spectra were collected on 400 MHz NMR spectrometers (Varian Inova-400). Chemical shifts for protons were reported in parts per million (ppm) downfield from tetramethylsilane and were referenced to residual protium in the NMR solvents ( $\text{CDCl}_3 = \delta 7.26$ ,  $\text{DMSO-}d_6 = \delta 2.50$ ). Chemical shifts for carbon resonances were reported in parts per million (ppm) downfield from tetramethylsilane and were referenced to the carbon resonances of the solvents ( $\text{CDCl}_3 = \delta 77.00$ ,  $\text{DMSO-}d_6 = \delta 39.70$ ). The following abbreviations were used to describe peak splitting patterns when appropriate: s = singlet, d = doublet, t = triplet, q = quartet, m = multiplet. Coupling constants J were reported in hertz unit (Hz).

### **Melting point**

Melting point (M.P.) were recorded on BÜCHI (M-560).

### **GC-MS**

GC-MS were recorded on SHIMADZU (GCMS-QP2010Plus).

### **HRMS**

High-resolution mass spectra (HRMS) were recorded on Thermo Fisher Scientific Q-Exactive.

### **Column Chromatography**

Analytical thin layer chromatography (TLC) was performed on 0.25 mm silica gel 60  $\text{F}_{254}$  plates. Column chromatography was undertaken on silica gel (300-400 mesh) using a proper eluent.

### **UV light**

Visualization on TLC was achieved by the use of UV light (254 nm).

## II. Optimization of C2 Arylation and C3 Diazenylation of Indole

**Table S1.** Optimization for HPF<sub>6</sub> activated reaction

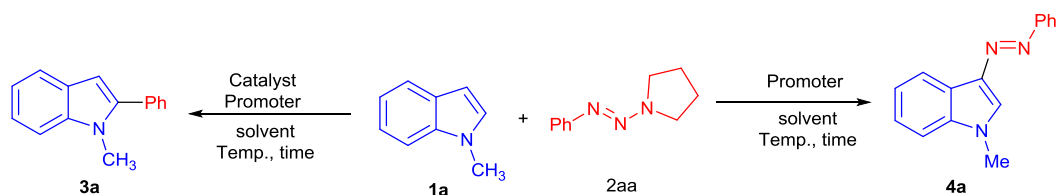

| Entry <sup>a</sup> | Catalyst (mol%)                        | Promoter (equiv.)      | Temp. (°C) | Solvent (mL)           | Yield (%) <sup>b</sup> |       |
|--------------------|----------------------------------------|------------------------|------------|------------------------|------------------------|-------|
|                    |                                        |                        |            |                        | 3a                     | 4a    |
| 1                  | Pd(OAc) <sub>2</sub> (5)               | TFA (1.0)              | 60         | DMF (2)                | 18                     | 33    |
| 2                  | Pd(OAc) <sub>2</sub> (5)               | TCA (1.0)              | 60         | DMF (2)                | 13                     | 30    |
| 3                  | Pd(OAc) <sub>2</sub> (5)               | HCl (1.0)              | 60         | DMF (2)                | Trace                  | 11    |
| 4                  | Pd(OAc) <sub>2</sub> (5)               | AcOH (1.0)             | 60         | DMF (2)                | Trace                  | 20    |
| 5                  | Pd(OAc) <sub>2</sub> (5)               | HBF <sub>4</sub> (1.0) | 60         | DMF (2)                | 50                     | 22    |
| 6                  | Pd(OAc) <sub>2</sub> (5)               | HPF <sub>6</sub> (1.0) | 60         | DMF (2)                | 53                     | 5     |
| 7                  | PdCl <sub>2</sub> (5)                  | HPF <sub>6</sub> (1.0) | 60         | DMF (2)                | 13                     | 6     |
| 8                  | Pd(Ph <sub>3</sub> ) <sub>4</sub> (5)  | HPF <sub>6</sub> (1.0) | 60         | DMF (2)                | ND                     | ND    |
| 9                  | Pd <sub>2</sub> (dba) <sub>3</sub> (5) | HPF <sub>6</sub> (1.0) | 60         | DMF (2)                | 15                     | ND    |
| 10                 | -                                      | HPF <sub>6</sub> (1.0) | 60         | DMF (2)                | ND                     | 37    |
| 11                 | Pd(OAc) <sub>2</sub> (5)               | HPF <sub>6</sub> (1.0) | 60         | EtOH (2)               | 5                      | 47    |
| 12                 | Pd(OAc) <sub>2</sub> (5)               | HPF <sub>6</sub> (1.0) | 60         | THF (2)                | 41                     | 26    |
| 13                 | Pd(OAc) <sub>2</sub> (5)               | HPF <sub>6</sub> (1.0) | 60         | DMAC (2)               | 53                     | 11    |
| 14                 | Pd(OAc) <sub>2</sub> (5)               | HPF <sub>6</sub> (1.0) | 60         | TFE (2)                | trace                  | 67    |
| 15                 | Pd(OAc) <sub>2</sub> (5)               | HPF <sub>6</sub> (1.0) | 60         | DCE (2)                | ND                     | 15    |
| 16                 | Pd(OAc) <sub>2</sub> (5)               | HPF <sub>6</sub> (1.0) | 60         | CH <sub>3</sub> CN (2) | ND                     | 19    |
| 17                 | Pd(OAc) <sub>2</sub> (5)               | HPF <sub>6</sub> (1.0) | 60         | NMP (2)                | 37                     | 23    |
| 18                 | Pd(OAc) <sub>2</sub> (5)               | HPF <sub>6</sub> (1.0) | 60         | H <sub>2</sub> O (2)   | ND                     | 17    |
| 19 <sup>c,d</sup>  | Pd(OAc) <sub>2</sub> (5.0)             | HPF <sub>6</sub> (1.0) | 60         | DMF (2)                | 68                     | 4     |
| 20 <sup>c,d</sup>  | Pd(OAc) <sub>2</sub> (5.0)             | HPF <sub>6</sub> (1.0) | 40         | DMF (2)                | 67                     | 2     |
| 21 <sup>c,d</sup>  | Pd(OAc) <sub>2</sub> (5.0)             | HPF <sub>6</sub> (1.0) | rt         | DMF (2)                | 67                     | Trace |

| Entry <sup>a</sup>  | Catalyst (mol%)            | Promoter (equiv.)      | Temp. (°C) | Solvent (mL)           | Yield (%) <sup>b</sup> |                 |
|---------------------|----------------------------|------------------------|------------|------------------------|------------------------|-----------------|
|                     |                            |                        |            |                        | 3a                     | 4a              |
| 22 <sup>c,d</sup>   | Pd(OAc) <sub>2</sub> (5.0) | HPF <sub>6</sub> (1.0) | 0          | DMF (2)                | 53                     | 7               |
| 23 <sup>c,d</sup>   | Pd(OAc) <sub>2</sub> (2.5) | HPF <sub>6</sub> (1.0) | rt         | DMF (2)                | 48 <sup>e</sup>        | 6               |
| 24 <sup>c,d</sup>   | Pd(OAc) <sub>2</sub> (7.5) | HPF <sub>6</sub> (1.0) | rt         | DMF (2)                | 78 <sup>e</sup>        | ND              |
| 25 <sup>c,d</sup>   | Pd(OAc) <sub>2</sub> (10)  | HPF <sub>6</sub> (1.0) | rt         | DMF (2)                | 84 <sup>e</sup>        | ND              |
| 26 <sup>c,d</sup>   | Pd(OAc) <sub>2</sub> (5.0) | HPF <sub>6</sub> (0.8) | rt         | DMF (2)                | 77 <sup>e</sup>        | ND              |
| 27 <sup>c,d</sup>   | Pd(OAc) <sub>2</sub> (5.0) | HPF <sub>6</sub> (0.6) | rt         | DMF (2)                | 78 <sup>e</sup>        | ND              |
| 28 <sup>c,d</sup>   | Pd(OAc) <sub>2</sub> (5.0) | HPF <sub>6</sub> (0.4) | rt         | DMF (2)                | 71 <sup>e</sup>        | ND              |
| 29 <sup>c,d</sup>   | Pd(OAc) <sub>2</sub> (5.0) | HPF <sub>6</sub> (0.6) | rt         | DMF (1)                | 82 <sup>e</sup>        | ND              |
| 30 <sup>c,d,f</sup> | Pd(OAc) <sub>2</sub> (5.0) | HPF <sub>6</sub> (0.6) | rt         | DMF (1)                | 84 <sup>e</sup>        | ND              |
| 31                  | —                          | HPF <sub>6</sub> (1.0) | 40         | TFE (1)                | ND                     | 85              |
| 32                  | —                          | HPF <sub>6</sub> (1.0) | 40         | THF (1)                | ND                     | 39              |
| 33                  | —                          | HPF <sub>6</sub> (1.0) | 40         | EtOH (1)               | ND                     | 77              |
| 34                  | —                          | HPF <sub>6</sub> (1.0) | 40         | H <sub>2</sub> O (1)   | ND                     | 72              |
| 35                  | —                          | HPF <sub>6</sub> (1.0) | 40         | CH <sub>3</sub> CN (1) | ND                     | 53              |
| 36                  | —                          | HPF <sub>6</sub> (1.0) | 40         | NMP (1)                | ND                     | 64              |
| 37                  | —                          | HPF <sub>6</sub> (1.0) | rt         | TFE (1)                | ND                     | 83              |
| 38 <sup>c,d</sup>   | —                          | HPF <sub>6</sub> (1.0) | rt         | TFE (1)                | ND                     | 93              |
| 39 <sup>c,d</sup>   | —                          | HPF <sub>6</sub> (1.0) | rt         | TFE (1)                | ND                     | 93 <sup>e</sup> |
| 40 <sup>c,d</sup>   | —                          | HPF <sub>6</sub> (1.0) | rt         | TFE (2)                | ND                     | 95 <sup>e</sup> |
| 41 <sup>c,d</sup>   | —                          | HPF <sub>6</sub> (0.8) | rt         | TFE (2)                | ND                     | 95 <sup>e</sup> |
| 42 <sup>c,d</sup>   | —                          | HPF <sub>6</sub> (0.6) | rt         | TFE (2)                | ND                     | 94 <sup>e</sup> |
| 43 <sup>c,d</sup>   | —                          | HPF <sub>6</sub> (0.4) | rt         | TFE (2)                | ND                     | 83 <sup>e</sup> |

<sup>a</sup> Reaction conditions: **1a** (0.2 mmol), **2aa** (0.24 mmol), promoter (1 equiv.), solvent (2.0 mL), 12 h. <sup>b</sup> GC yield, benzophenone as internal standard. <sup>c</sup> HPF<sub>6</sub> was added slowly over 30 min. <sup>d</sup> The reaction time is determined by TLC detection. <sup>e</sup> Isolated yield. <sup>f</sup> **1aa** (0.26 mmol). ND = no detection. TFA = Trifluoroacetic acid. TCA = Trichloroacetic acid.

**Table S2.** Optimization for **IL** activated reaction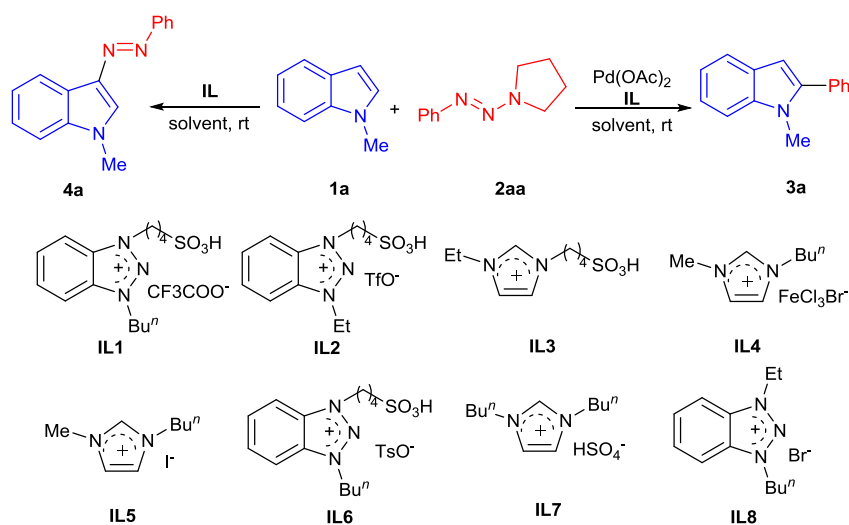

| Entry <sup>a</sup> | Catalyst (mol %)                | IL (equiv.)      | Solvent                   | Yield (%) <sup>b</sup> |    |
|--------------------|---------------------------------|------------------|---------------------------|------------------------|----|
|                    |                                 |                  |                           | 3a                     | 4a |
| 1                  | $\text{Pd}(\text{OAc})_2$ (5.0) | <b>IL1</b> (1)   | DMF                       | 32                     | ND |
| 2                  | $\text{Pd}(\text{OAc})_2$ (5.0) | <b>IL2</b> (1)   | DMF                       | 54                     | ND |
| 3                  | $\text{Pd}(\text{OAc})_2$ (5.0) | <b>IL3</b> (1)   | DMF                       | 57                     | ND |
| 4                  | $\text{Pd}(\text{OAc})_2$ (5.0) | <b>IL4</b> (1)   | DMF                       | Trace                  | ND |
| 5                  | $\text{Pd}(\text{OAc})_2$ (5.0) | <b>IL5</b> (1)   | DMF                       | Trace                  | ND |
| 6                  | $\text{Pd}(\text{OAc})_2$ (5.0) | <b>IL6</b> (1)   | DMF                       | 50                     | ND |
| 7                  | $\text{Pd}(\text{OAc})_2$ (5.0) | <b>IL7</b> (1)   | DMF                       | 27                     | ND |
| 8                  | $\text{Pd}(\text{OAc})_2$ (5.0) | <b>IL8</b> (1)   | DMF                       | Trace                  | ND |
| 9                  | $\text{Pd}(\text{OAc})_2$ (5.0) | <b>IL3</b> (1)   | $\text{H}_2\text{O}$      | ND                     | ND |
| 10                 | $\text{Pd}(\text{OAc})_2$ (5.0) | <b>IL3</b> (1)   | THF                       | 37                     | ND |
| 11                 | $\text{Pd}(\text{OAc})_2$ (5.0) | <b>IL3</b> (1)   | DCM                       | 40                     | ND |
| 12                 | $\text{Pd}(\text{OAc})_2$ (5.0) | <b>IL3</b> (1)   | DMAC                      | 52                     | ND |
| 13                 | $\text{Pd}(\text{OAc})_2$ (5.0) | <b>IL3</b> (0.8) | DMF                       | 62                     | ND |
| 14                 | $\text{Pd}(\text{OAc})_2$ (5.0) | <b>IL3</b> (0.6) | DMF                       | 55                     | ND |
| 15 <sup>c</sup>    | $\text{Pd}(\text{OAc})_2$ (5.0) | <b>IL3</b> (0.8) | DMF/ $\text{H}_2\text{O}$ | 83                     | ND |
| 16 <sup>d</sup>    | $\text{Pd}(\text{OAc})_2$ (5.0) | <b>IL3</b> (0.8) | DMF/ $\text{H}_2\text{O}$ | 74                     | ND |
| 17 <sup>e</sup>    | $\text{Pd}(\text{OAc})_2$ (5.0) | <b>IL3</b> (0.8) | DMF/ $\text{H}_2\text{O}$ | 77                     | ND |

| Entry <sup>a</sup> | Catalyst<br>(mol %)        | IL (equiv.)      | Solvent              | Yield (%) <sup>b</sup> |                 |
|--------------------|----------------------------|------------------|----------------------|------------------------|-----------------|
|                    |                            |                  |                      | 3a                     | 4a              |
| 18 <sup>c</sup>    | Pd(OAc) <sub>2</sub> (2.5) | <b>IL3</b> (0.8) | DMF/H <sub>2</sub> O | 70                     | ND              |
| 19 <sup>c</sup>    | Pd(OAc) <sub>2</sub> (7.5) | <b>IL3</b> (0.8) | DMF/H <sub>2</sub> O | 85                     | ND              |
| 20 <sup>c</sup>    | Pd(OAc) <sub>2</sub> (5.0) | <b>IL3</b> (0.8) | DMF/H <sub>2</sub> O | 83 <sup>f</sup>        | ND              |
| 21                 | -                          | <b>IL1</b> (1)   | TFE                  | ND                     | 41              |
| 22                 | -                          | <b>IL2</b> (1)   | TFE                  | ND                     | 90              |
| 23                 | -                          | <b>IL3</b> (1)   | TFE                  | ND                     | 92              |
| 24                 | -                          | <b>IL4</b> (1)   | TFE                  | ND                     | 96              |
| 25                 | -                          | <b>IL5</b> (1)   | TFE                  | ND                     | Trace           |
| 26                 | -                          | <b>IL6</b> (1)   | TFE                  | ND                     | 65              |
| 27                 | -                          | <b>IL7</b> (1)   | TFE                  | ND                     | 48              |
| 28                 | -                          | <b>IL8</b> (1)   | TFE                  | ND                     | Trace           |
| 29                 | -                          | <b>IL4</b> (1)   | H <sub>2</sub> O     | ND                     | 58              |
| 30                 | -                          | <b>IL4</b> (1)   | EtOH                 | ND                     | 88              |
| 31                 | -                          | <b>IL4</b> (1)   | CH <sub>3</sub> CN   | ND                     | 6               |
| 32                 | -                          | <b>IL4</b> (0.8) | TFE                  | ND                     | 96              |
| 33                 | -                          | <b>IL4</b> (0.6) | TFE                  | ND                     | 95              |
| 34                 | -                          | <b>IL4</b> (0.4) | TFE                  | ND                     | 87              |
| 35                 | -                          | <b>IL4</b> (0.6) | TFE                  | ND                     | 95 <sup>f</sup> |

<sup>a</sup> Reaction conditions: **1a** (0.20 mmol), **2a** (0.24 mmol), Pd(OAc)<sub>2</sub> (5.0 mol %), **IL**, Solvent (2 mL). <sup>b</sup> GC yield, benzophenone as internal standard, the reaction time is determined by TLC detection. <sup>c</sup> DMF : H<sub>2</sub>O (1 : 1). <sup>d</sup> DMF : H<sub>2</sub>O (2 : 1). <sup>e</sup> DMF : H<sub>2</sub>O (1 : 2). <sup>f</sup> Isolated yields. ND = No detection. DMAC = Dimethylacetamide

### III. The Synthetic Procedure for selective C2 Arylation and C3 Diazenylation of 1-substituted indole.

**Schem S1.** Selective C2 Arylation and C3 Diazenylation of 1-substituted indole

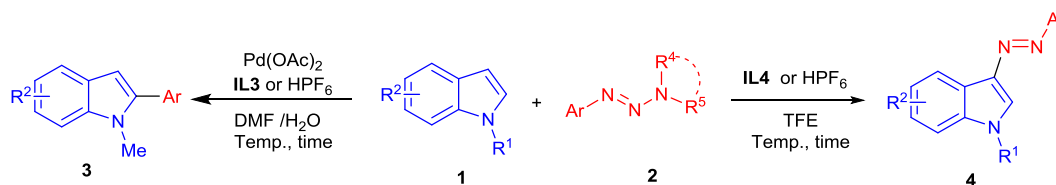

**Synthesis of 3a-3d, 3f-3i, 3k-3o.** A tube was charged with 1-substituted indole (0.2 mmol), Pd(OAc)<sub>2</sub> (2.2 mg, 5.0 mol%), aryltriazene (0.26 mmol) and DMF (1 mL). HPF<sub>6</sub> (60 wt.% solution in water, 18  $\mu$ L, 0.12 mmol) in DMF was introduced over 30 min to the mixture at 0°C, then the reaction mixture stirred at room temperature for 4 h [or **IL3** (46 mg / 0.16 mmol) in 1 mL of H<sub>2</sub>O was dropped slowly to the mixture, then stirred at room temperature for 5 h]. When the reaction completed, 5 mL of water was added to the mixture, the aqueous mixture was extracted with ethyl acetate (3 $\times$ 5 mL). The combined DMF/organic phase was dried over MgSO<sub>4</sub>, filtered and concentrated under reduced pressure, the residue was purified by flash column chromatography (petroleum ether / ethyl acetate 100:1-50:1) to afford the desired product.

**Synthesis of 3e, 3j and 3q activated by IL3.** A tube was charged with 1-methyl indole (0.2 mmol), Pd (OAc)<sub>2</sub> (2.2 mg, 5 mol%), aryltriazene (0.24 mmol) and DMF (1 mL). **IL3** (46 mg, 0.16 mmol) in 1 mL of water was dropped slowly to the mixture. The reaction mixture was stirred at 60 °C for 5 h, then cooled it to room temperature when the reaction completed. 5 mL of water was added to the mixture, the aqueous layer was extracted with ethyl acetate (3 $\times$ 5 mL). The combined organic phase was dried over MgSO<sub>4</sub>, filtered and concentrated under reduced pressure, the residue was purified by flash column chromatography (petroleum ether / ethyl acetate 100:1-10:1) to afford the desired product.

**Synthesis of 3j, 3p and 3q activated by HPF<sub>6</sub>.** A tube was charged with 1-methyl indole (0.2 mmol), Pd (OAc)<sub>2</sub> (2.2 mg, 5.0 mol%), aryltriazene (0.26 mmol) and DMF (1 mL). HPF<sub>6</sub> (60 wt.% solution in water, 18  $\mu$ L, 0.12 mmol) in DMF was introduced over 30 min to the mixture at 0 °C. The mixture stirred at 60 °C for 10 h, then cooled it to room temperature when the reaction completed. 5 mL of water was added to the



mixture, the aqueous layer was extracted with ethyl acetate (3×5 mL). The combined organic phase was dried over MgSO<sub>4</sub>, filtered and concentrated under reduced pressure, the residue was purified by flash column chromatography (petroleum ether / ethyl acetate 100:1:1-10:1) to afford the desired product.

**Synthesis of 4a-4q activated by HPF<sub>6</sub>.** A tube was charged with 1-substituted indole (0.2 mmol), aryltriazene (0.24 mmol) and CF<sub>3</sub>CH<sub>2</sub>OH (2 mL). HPF<sub>6</sub> (60 wt.% solution in water, 18 μL, 0.12 mmol) in CF<sub>3</sub>CH<sub>2</sub>OH was introduced over 30 min to the mixture at 0 °C. The mixture was stirred at room temperature until the reaction completion (about 1-4h). 5 mL of water was added to the mixture, the aqueous layer was extracted with ethyl acetate (3×5 mL). The combined organic phase was dried over MgSO<sub>4</sub>, filtered and concentrated under reduced pressure, the residue was purified by flash column chromatography (petroleum ether/ethyl acetate 50:1-15:1) to afford the desired product.

**Synthesis of 4a- 4q activated by IL4.** A tube was charged with indole (0.2 mmol), aryltriazene (0.24 mmol) and CF<sub>3</sub>CH<sub>2</sub>OH (1 mL). **IL4** (46 mg, 0.12 mmol) in CF<sub>3</sub>CH<sub>2</sub>OH was dropped slowly to the mixture at 0 °C. Then the reaction stirred at room temperature for 2 h. When the reaction completed, 5 mL of water was added to the mixture, the aqueous layer was extracted with ethyl acetate (3×5 mL). The combined organic phase was dried over MgSO<sub>4</sub>, filtered and concentrated under reduced pressure, the residue was purified by flash column chromatography (petroleum ether/ethyl acetate 50:1-15:1) to afford the desired product.

#### IV. Gram-Scale experiments and Late-Stage Modification of Drugs

**Scheme S2.** Gram-Scale experiments for C2-arylation of 1-methylindole

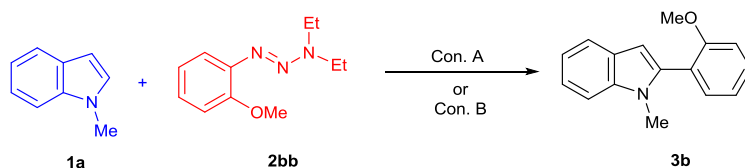

Con. A: A 100 mL round-bottomed flask was charged with 1-methylindole (5 mmol, 0.65 g), Pd (OAc)<sub>2</sub> (0.25 mmol, 56 mg), (*E*)-3,3-diethyl-1-(2-methoxyphenyl)triaz-1-ene (5.5 mmol, 1.14 g) and DMF (20 mL), stirring until complete dissolution. An aqueous solution of **IL3** (4 mmol of **IL3** was dissolved with 20 mL of H<sub>2</sub>O) was introduced slowly to the above mixture at 0 °C. The reaction stirred at room temperature for 12 h. The reaction mixture was diluted with water (30 mL), and the aqueous solution was extracted with ethyl acetate (3×20 mL). The combined organic layers were dried over MgSO<sub>4</sub>, filtered and concentrated. The residue was purified by column chromatography (petroleum ether / ethyl acetate 100:1-20:1) to afford the product **3b** (colorless oil, 0.88 g, 74% yield).

Con. B: A 100 mL round-bottomed flask was charged with 1-methylindole (5 mmol, 0.65 g), Pd (OAc)<sub>2</sub> (0.25 mmol, 56 mg) and (*E*)-3,3-diethyl-1-(2-methoxyphenyl)triaz-1-ene (6.5 mmol, 1.33 g) and DMF (30 mL). A solution of HPF<sub>6</sub> (60 wt.% solution in water, 0.73 mL, 5 mmol) in DMF(30 mL) was dropped slowly over 30 min to the reaction mixture at 0 °C. After that, the resulting mixture was then stirred at 60 °C for 1 h. The reaction mixture cooled to room temperature and diluted with water (30 mL), the aqueous solution was extracted with ethyl acetate (3×30 mL). The combined organic layers were dried over MgSO<sub>4</sub>, filtered and concentrated. The residue was purified by flash column chromatography (petroleum ether / ethyl acetate 100:1-20:1) to afford the desired product **3b** (colorless oil, 0.96 g, 81% yield).

**Scheme S3.** Gram-scale and late-stage modification of drugs

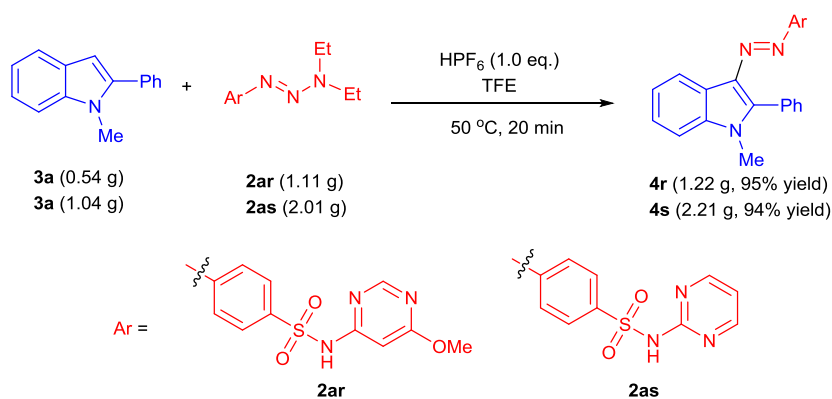

**Gram-scale synthesis of 4r.** A round-bottomed flask was charged with 1-methyl-2-phenylindole (0.53 g, 2.6 mmol), (*E*)-*N*-(6-methoxypyrimidin-4-yl)-4-(pyrrolidin-1-yl)diazenyl)benzenesulfonamide (1.11 g, 3.1 mmol) and TFE (20 mL).  $HPF_6$  (60 wt.% solution in water, 0.377 mL, 2.6 mmol) in 30 mL of  $CF_3CH_2OH$  was dropped slowly over 30 min to the mixture at  $0^\circ C$ . The mixture was then reacted at  $50^\circ C$  for 20 min. The reaction mixture cooled to room temperature and 100 mL of water was added, the generated precipitation was filtered and recrystallized with ethanol to afford the 4r (1.22 g, 95% yield).

**Gram-scale synthesis of 4s.** A round-bottomed flask was charged with 1-methyl-2-phenylindole (1.04 g, 5 mmol), (*E*)-*N*-(pyrimidin-2-yl)-4-(pyrrolidin-1-yl)diazenyl)benzenesulfonamide (2.01 g, 6 mmol) and solvent (30 mL).  $HPF_6$  (60 wt.% solution in water, 0.725 mL, 5 mmol) in 30 mL of  $CF_3CH_2OH$  was dropped slowly over 30 min to the mixture at  $0^\circ C$ . The mixture was then reacted at  $50^\circ C$  for 20 min. The reaction mixture cooled to room temperature and 100 mL water was added, the generated precipitation was filtered and recrystallized with ethanol to afford the 4s (2.21 g, 94% yield).

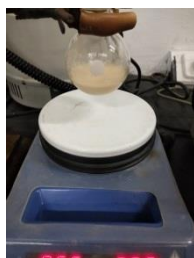

Starting materials in solvent

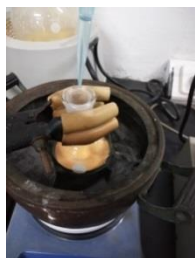

$HPF_6$  was added by dropwise

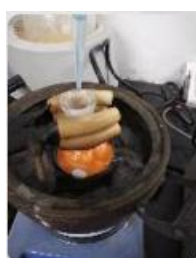

Continuous addition of  $HPF_6$

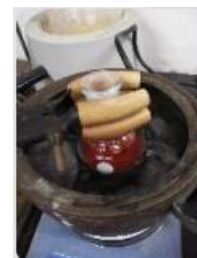

Complete addition of  $HPF_6$

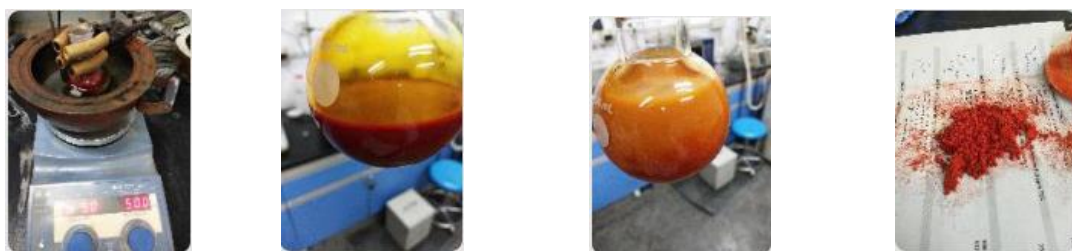

The reaction mixture at 10 min    Upon completion of the reaction    Water was added to the mixture    The isolated product **4r**

**Figure S1.** The reaction process diagram for gram-scale and late-stage modification of drugs

## V. N-debenzylation of N-benzylated products <sup>[10]</sup>

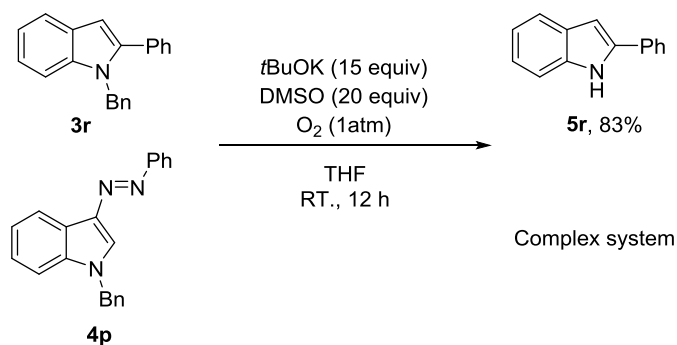

Synthesis of **5r**: A flame-dried flask was added compound **3r** (0.3 mmol) and DMSO (6 mmol), the mixture stirred at room temperature until the clear solution. KO<sup>t</sup>Bu (4.5 mmol, 1 M soln in THF) was then added dropwise. After that, oxygen was bubbled into the solution through a gas dispersor for 10 min. Upon completion (determined by TLC) the reaction was quenched with saturated ammonium chloride. The product was extracted with EtOAc (3 × 10mL). The organic layer were combined, dried over Na<sub>2</sub>SO<sub>4</sub>, filtered and concentrated. The crude product was purified by column chromatography (V<sub>DCM</sub> / V<sub>MeOH</sub> = 15:1-10:1).

## VI. ILs Recycling Experiment

**Scheme S4.** IL3 recycling experiment for C2 arylation of 1-methylindole

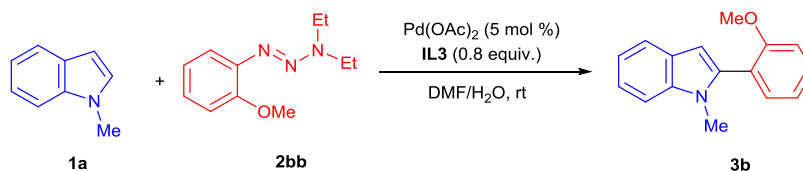

A tube was charged with 1-methylindole (25.6  $\mu$ L, 0.2 mmol), Pd (OAc)<sub>2</sub> (2.2 mg, 5 mol %), (*E*)-3,3-diethyl-1-(*o*-tolyl)triaz-1-ene (42 mg, 0.22 mmol) and DMF (1 mL). **IL3** (46 mg, 0.16 mmol) dissolved in water (1 mL) and introduced slowly to the reaction mixture at 0°C. The reaction was monitored by TLC plate and quenched it

upon disappearance of the starting material. For each cycle, water (10 mL) and ethyl acetate (10 mL) were added, the organic phase was extracted with water ( $3 \times 10$  mL). The aqueous phase were combined, concentrated, and **IL3** was recovered and recycled for the next reaction after drying it in vacuo at 90 °C. For the first run, the reaction conditions remain the same. In the subsequent two cycles, another 2 mol % of **IL3** was needed, and the reaction time also expended from 1.5h to 7h and 12h. In the fourth cycle, the desired product was obtained after adding another 5 mol % of **IL3** and expending the time to 12 h. The corresponding results were listed in Table S3.

**Table S3.** The results of **IL3** recycling experiments for C2-arylation of 1-methylindole

| Run       | 1  | 2  | 3  | 4  |
|-----------|----|----|----|----|
| Yield (%) | 96 | 87 | 70 | 55 |

**Scheme S5.** **IL4** recycling experiment for C3 diazenylation of 1-propylindole

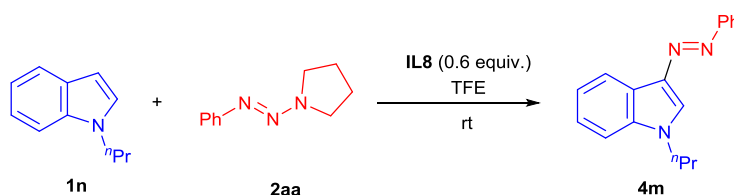

A tube was charged with 1-propylindole (31.8 mg, 0.2 mmol), (*E*)-1-(phenyldiazenyl)pyrrolidine (38.5 mg, 0.22 mmol) and  $\text{CF}_3\text{CH}_2\text{OH}$  (1 mL). **IL4** (46 mg, 0.12 mmol) dissolved in water (1 mL) and introduced slowly to the reaction mixture at 0°C. The reaction was monitored by TLC plate and quenched it upon disappearance of the starting material (Scheme S5). For each cycle, water (10 mL) and ethyl acetate (10 mL) were added, the organic phase was extracted with water ( $3 \times 10$  mL). The aqueous phase were combined,, concentrated, and **IL4** was recovered and recycled for the next reaction after drying it in vacuo at 90 °C. For the first run, the reaction conditions remain the same. In the subsequent two cycles, the reaction time expended from 2 h to 4 h and 7 h. In the fourth cycle, the desired product was obtained after adding another 2 mol % of **IL4** and expending the time to 12 h. The corresponding results were listed in Table S5.

**Table S4.** The results of **IL4** recycling experiment for C3 diazenylation of 1-propylindole

| Run       | 1  | 2  | 3  | 4  |
|-----------|----|----|----|----|
| Yield (%) | 98 | 95 | 90 | 83 |

## VII. The data for C2 Arylation and C3 Diazenylation of 1-substituted indole

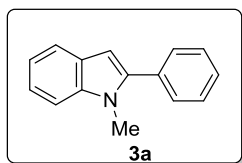

1-methyl-2-phenyl-1*H*-indole **3a**<sup>[1]</sup>: Colorless crystals, mp 91.0-92.5 °C. <sup>1</sup>H NMR (400 MHz, CDCl<sub>3</sub>). δ: 3.78 (s, 3 H), 6.59 (d, *J* = 0.8 Hz, 1 H), 7.15-7.19 (m, 1 H), 7.26-7.30 (m, 1 H), 7.38-7.45 (m, 2 H), 7.48-7.52 (m, 2 H), 7.53-7.56 (m, 2 H), 7.66 (d, *J* = 8, 1H). <sup>13</sup>C NMR (100 MHz, CDCl<sub>3</sub>). δ: 31.17, 101.61, 109.58, 119.83, 120.44, 121.63, 127.83, 127.91, 128.47, 129.35, 132.81, 138.30, 141.54 ppm. MS *m/z*: 207.

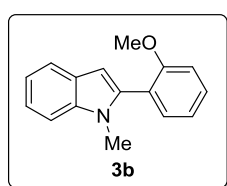

2-(2-methoxyphenyl)-1-methyl-1*H*-indole **3b**<sup>[3]</sup>: Colorless oil. <sup>1</sup>H NMR (400 MHz, CDCl<sub>3</sub>). δ: 3.50 (s, 3 H), 3.72 (s, 3 H), 6.41 (s, 1 H), 6.92 (d, *J* = 8 Hz, 1 H), 6.95-6.99 (m, 1 H), 7.02-7.06 (m, 1 H), 7.13-7.17 (m, 1 H), 7.26-7.30 (m, 2 H), 7.32-7.36 (m, 1 H), 7.54-7.57 (m, 1 H). <sup>13</sup>C NMR (100 MHz, CDCl<sub>3</sub>). δ: 30.69, 55.42, 101.68, 109.30, 110.82, 119.34, 120.40, 120.63, 121.22, 127.91, 130.03, 132.51, 137.58, 138.52, 154.46 ppm. MS *m/z*: 237.

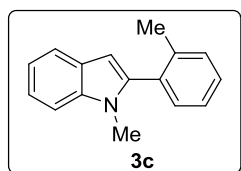

1-methyl-2-(*o*-tolyl)-1*H*-indole **3c**<sup>[2]</sup>: Colorless solid, mp 88.7-90.8 °C, <sup>1</sup>H NMR (400 MHz, CDCl<sub>3</sub>). δ: 2.26 (s, 3 H), 3.56 (s, 3 H), 6.50 (d, *J* = 0.8 Hz, 1 H), 7.19-7.23 (m, 1 H), 7.26-7.42 (m, 6 H), 7.69-7.71 (m, 1 H). <sup>13</sup>C NMR (100 MHz, CDCl<sub>3</sub>). δ: 20.22, 30.49, 101.66, 109.57, 119.81, 120.54, 121.43, 125.71, 128.15, 128.81, 130.22, 131.29, 132.69, 137.44, 138.22, 140.66 ppm. MS *m/z*: 221.

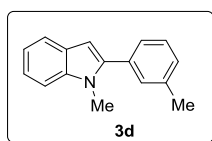

1-methyl-2-(*m*-tolyl)-1*H*-indole **3d**<sup>[7]</sup>: Colorless solid, mp 45.4-46.8 °C, <sup>1</sup>H NMR (400 MHz, CDCl<sub>3</sub>). δ: 2.43 (s, 3 H), 3.74 (s, 3 H), 6.55 (d, *J* = 0.8 Hz, 1 H), 7.12-7.16 (m, 1 H), 7.20-7.26 (m, 2 H), 7.29-7.37 (m, 4 H), 7.62-7.64 (m, 1 H). <sup>13</sup>C NMR (100 MHz, CDCl<sub>3</sub>). δ: 21.51, 31.16, 101.48, 109.55, 119.76, 120.39, 121.53, 126.42, 127.92, 128.32, 128.61, 130.06, 132.71, 138.15, 138.26, 141.70 ppm. MS *m/z*: 221.

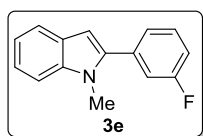

2-(3-fluorophenyl)-1-methyl-1*H*-indole **3e**<sup>[9]</sup>: Colorless oil. <sup>1</sup>H NMR (400 MHz, CDCl<sub>3</sub>). δ: 3.78 (s, 3 H), 6.62 (s, 1 H), 7.07-7.25 (m, 3 H), 7.28-7.34 (m, 2 H), 7.37-7.49 (m, 2 H), 7.68 (d, *J* = 7.6 Hz, 1 H). <sup>13</sup>C NMR (100 MHz, CDCl<sub>3</sub>). δ: 31.20, 102.23, 109.67, 114.69 (*J*<sub>C-F</sub> = 21

Hz), 116.12 ( $J_{\text{C-F}} = 22$  Hz), 120.02, 120.63, 122.04, 124.95, 127.76, 128.73, 130.02 ( $J_{\text{C-F}} = 8.5$  Hz), 134.90 ( $J_{\text{C-F}} = 8.3$  Hz), 138.48, 140.10 ( $J_{\text{C-F}} = 2.1$  Hz), 162.66 ( $J_{\text{C-F}} = 245$  Hz) ppm. MS m/z: 225.

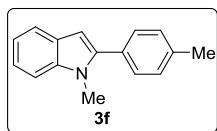

1-methyl-2-(p-tolyl)-1*H*-indole **3f**<sup>[1]</sup>: Colorless solid, mp 87.7-89.0 °C. <sup>1</sup>H NMR (400 MHz, CDCl<sub>3</sub>).  $\delta$ : 2.42 (s, 3 H), 3.73 (s, 3 H), 6.53 (s, 1 H), 7.11-7.15 (m, 1 H), 7.21-7.28 (m, 3 H), 7.34-7.41 (m, 3 H), 7.61-7.63 (m, 1 H). <sup>13</sup>C NMR (100 MHz, CDCl<sub>3</sub>).  $\delta$ : 21.27, 31.11, 101.25, 109.52, 119.75, 120.32, 121.45, 127.93, 129.17, 129.24, 129.87, 137.73, 138.20, 141.61 ppm. MS m/z: 221.

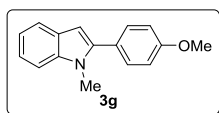

2-(4-methoxyphenyl)-1-methyl-1*H*-indole **3g**<sup>[3]</sup>: Colorless solid, mp 117.8-118.8 °C. <sup>1</sup>H NMR (400 MHz, CDCl<sub>3</sub>).  $\delta$ : 3.75 (s, 3 H), 3.90 (s, 3 H), 6.54 (s, 1 H), 7.02-7.05 (m, 2 H), 7.15-7.19 (m, 1 H), 7.25-7.29 (m, 1 H), 7.38 (d,  $J = 8.4$  Hz, 1 H), 7.45-7.49 (m, 2 H), 7.65-7.67 (m, 1 H). <sup>13</sup>C NMR (100 MHz, CDCl<sub>3</sub>).  $\delta$ : 31.01, 55.33, 101.02, 109.48, 113.96, 119.75, 120.25, 121.36, 125.28, 128.02, 130.59, 138.15, 141.40, 159.45 ppm. MS m/z: 237.

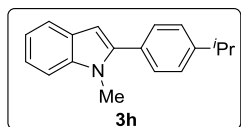

2-(4-isopropylphenyl)-1-methyl-1*H*-indole **3h**<sup>[5]</sup>: Colorless solid, mp 135.3-135.5 °C. <sup>1</sup>H NMR (400 MHz, CDCl<sub>3</sub>).  $\delta$ : 1.30 (s, 3 H), 1.32 (s, 3 H), 2.94-3.01 (m, 1 H), 3.74 (s, 3 H), 6.54 (s, 1 H), 7.11-7.15 (m, 1 H), 7.21-7.25 (m, 1 H), 7.31-7.36 (m, 3 H), 7.42-7.45 (m, 2 H), 7.63 (d,  $J = 8$  Hz, 1 H). <sup>13</sup>C NMR (100 MHz, CDCl<sub>3</sub>).  $\delta$ : 23.96, 31.14, 33.93, 101.31, 109.52, 119.75, 120.34, 121.45, 126.55, 127.99, 129.31, 130.25, 138.25, 141.68, 148.62 ppm. MS m/z: 249.

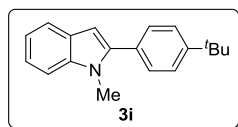

2-(4-(*tert*-butyl)phenyl)-1-methyl-1*H*-indole **3i**<sup>[1]</sup>: Yellowish solid, mp 108.4-109.1 °C. <sup>1</sup>H NMR (400 MHz, CDCl<sub>3</sub>).  $\delta$ : 1.38 (s, 9 H), 3.75 (s, 3 H), 6.54 (s, 1 H), 7.11-7.15 (m, 1 H), 7.21-7.25 (m, 1 H), 7.35 (d,  $J = 8.4$  Hz, 1 H), 7.43-7.50 (m, 4 H), 7.63 (d,  $J = 8$  Hz, 1 H). <sup>13</sup>C NMR (100 MHz, CDCl<sub>3</sub>).  $\delta$ : 31.18, 31.33, 34.67, 101.30, 109.52, 119.74, 120.33, 121.44, 125.41, 127.95, 129.02, 129.85, 138.22, 141.59, 150.85 ppm. MS m/z: 263.



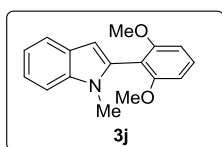

2-(2,6-dimethoxyphenyl)-1-methyl-1*H*-indole **3j**<sup>[6]</sup>: White solid, mp 154.7-156.1 °C. <sup>1</sup>H NMR (400 MHz, CDCl<sub>3</sub>). δ: 3.54 (s, 3 H), 3.77 (s, 6 H), 6.51 (d, *J* = 0.8 Hz, 1 H), 6.84 (s, 1 H), 6.70 (s, 1 H), 7.10-7.14 (m, 1 H), 7.20-7.26 (m, 1 H), 7.36-7.42 (m, 2 H), 7.65-7.67(m, 1 H). <sup>13</sup>C NMR (100 MHz, CDCl<sub>3</sub>). δ: 30.17, 55.84, 102.28, 103.85, 109.23, 110.16, 118.94, 120.43, 120.64, 127.99, 130.29, 133.01, 137.16, 159.22 ppm. MS *m/z*: 267.

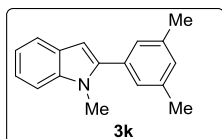

2-(3,5-dimethylphenyl)-1-methyl-1*H*-indole **3k**<sup>[11]</sup>: Yellowish liquid, <sup>1</sup>H NMR (400 MHz, CDCl<sub>3</sub>). δ: 2.40 (s, 6 H), 3.77 (s, 3 H), 6.55 (s, 1 H), 7.07 (s, 1 H), 7.14-7.18 (m, 3 H), 7.24-7.28 (m, 1 H), 7.38 (d, *J* = 8.4 Hz, 1 H), 7.65 (d, *J* = 7.6 Hz, 1 H). <sup>13</sup>C NMR (100 MHz, CDCl<sub>3</sub>). δ: 21.38, 31.17, 101.39, 109.52, 119.71, 120.36, 121.45, 127.17, 127.96, 129.53, 132.68, 138.00, 138.25, 141.86. MS *m/z*: 235.

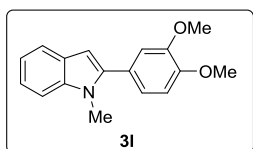

2-(3,4-dimethoxyphenyl)-1-methyl-1*H*-indole **3l**<sup>[8]</sup>: Light yellow, mp 86.4-88.2 °C. <sup>1</sup>H NMR (400 MHz, CDCl<sub>3</sub>). δ: 3.74 (s, 3H), 3.93 (s, 3 H), 3.95 (s, 3 H), 6.52 (s, 1 H), 6.97 (d, *J* = 8.4 Hz, 1 H), 7.02-7.07 (m, 2 H), 7.12-7.16 (m, 1 H), 7.22-7.24 (m, 1 H), 7.34-7.37 (m, 1 H), 7.61-7.63 (m, 1 H). <sup>13</sup>C NMR (100 MHz, CDCl<sub>3</sub>). δ: 31.10, 55.99, 101.10, 109.51, 111.10, 112.76, 119.83, 120.28, 121.49, 121.93, 125.53, 127.93, 138.14, 141.49, 148.85, 148.99 ppm. MS *m/z*: 267.

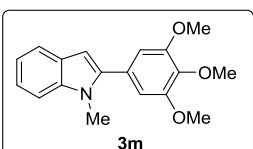

1-methyl-2-(3,4,5-trimethoxyphenyl)-1*H*-indole **3m**<sup>[4]</sup>: White solid, mp 101.4-102.2 °C. <sup>1</sup>H NMR (400 MHz, CDCl<sub>3</sub>). δ: 3.76 (s, 3H), 3.90 (s, 6H), 3.92 (s, 3H), 6.54 (s, 1H), 6.70 (s, 2H), 7.12-7.16 (m, 1H), 7.23-7.27 (m, 1H), 7.36 (d, *J* = 8 Hz 1H), 7.63 (d, *J* = 8 Hz, 1 H). <sup>13</sup>C NMR (100 MHz, CDCl<sub>3</sub>). δ: 31.18, 56.18, 60.95, 101.36, 106.62, 109.55, 119.91, 120.37, 121.70, 127.76, 128.30, 137.89, 138.18, 141.48, 153.12. MS *m/z*: 297.

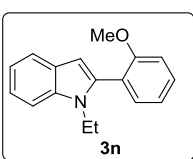

1-ethyl-2-(2-methoxyphenyl)-1*H*-indole **3n**: Colorless solid, mp 75.8-77.0 °C, <sup>1</sup>H NMR (400 MHz, CDCl<sub>3</sub>). δ: 1.21 (t, 3 H), 3.77 (s, 3 H), 4.01 (q, 2 H), 6.44 (s, 1 H), 6.97-7.12 (m, 3 H), 7.18-7.22 (m, 1 H), 7.32-7.41 (m, 3 H), 7.62 (d, *J* = 8 Hz, 1 H). <sup>13</sup>C NMR (100 MHz, CDCl<sub>3</sub>). δ: 15.01, 38.85, 55.41, 102.07, 109.65, 110.86, 119.24, 120.54, 120.57,

121.08, 122.26, 128.38, 130.03, 132.63, 136.38, 137.69, 157.53 ppm. HRMS (ESI) calcd. for C<sub>17</sub>H<sub>18</sub>NO ([M+H]<sup>+</sup>): 252.13829, found: 252.13797.

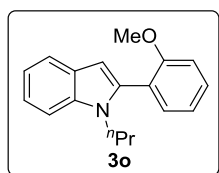

2-(2-methoxyphenyl)-1-propyl-1*H*-indole **3o**: Colorless liquid. <sup>1</sup>H NMR (400 MHz, CDCl<sub>3</sub>). δ: 0.73 (t, 3 H), 1.63-1.72 (m, 2 H), 3.80 (s, 3 H), 3.96 (t, 2 H), 6.47 (s, 1 H), 7.00-7.14 (m, 3 H), 7.20-7.26 (m, 1 H), 7.36-7.46 (m, 3 H), 7.65 (d, *J* = 8 Hz, 1 H). <sup>13</sup>C NMR (100 MHz, CDCl<sub>3</sub>). δ: 11.37, 23.00, 45.80, 55.44, 102.01, 109.84, 110.88, 119.20, 120.50, 120.57, 121.01, 122.42, 128.27, 129.97, 132.73, 136.77, 138.10, 157.43 ppm. HRMS (ESI) calcd. for C<sub>18</sub>H<sub>20</sub>NO ([M+H]<sup>+</sup>): 266.15394, found: 266.15366.

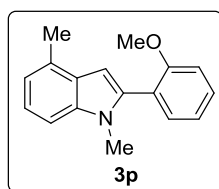

2-(2-methoxyphenyl)-1,4-dimethyl-1*H*-indole **3p**: Colorless liquid. <sup>1</sup>H NMR (400 MHz, CDCl<sub>3</sub>). δ: 2.56 (s, 3 H), 3.57 (s, 3 H), 3.80 (s, 3 H), 6.50 (s, 1 H), 6.92 (d, *J* = 6.8 Hz, 1 H), 7.00-7.07 (m, 2 H), 7.11-7.20 (m, 2 H), 7.37-7.42 (m, 2 H). <sup>13</sup>C NMR (100 MHz, CDCl<sub>3</sub>). δ: 18.68, 30.84, 55.45, 100.26, 106.94, 110.82, 119.59, 120.66, 121.45, 122.18, 127.81, 129.92, 129.98, 132.56, 137.36, 137.93, 157.52 ppm. HRMS (ESI) calcd. for C<sub>17</sub>H<sub>18</sub>NO ([M+H]<sup>+</sup>): 252.13829, found: 252.13794.

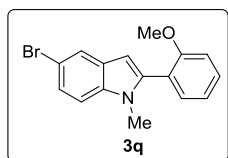

5-bromo-2-(2-methoxyphenyl)-1-methyl-1*H*-indole **3q**: White solid, mp 75.4-77.2 °C, <sup>1</sup>H NMR (400 MHz, CDCl<sub>3</sub>). δ: 3.56 (s, 3 H), 3.82 (s, 3 H), 6.43 (s, 1 H), 7.01-7.08 (m, 2 H), 7.20-7.26 (m, 1 H), 7.30 (q, *J* = 8.8 Hz, 1 H), 7.35 (d, *J* = 7.4 Hz, 1 H), 7.42-7.48 (m, 1 H), 7.75 (d, *J* = 2 Hz, 1 H). <sup>13</sup>C NMR (100 MHz, CDCl<sub>3</sub>). δ: 30.85, 55.48, 101.26, 110.76, 110.93, 112.64, 120.73, 121.43, 122.80, 123.99, 129.56, 130.36, 132.44, 136.29, 139.79, 157.43 ppm. HRMS (ESI) calcd. for C<sub>16</sub>H<sub>15</sub>BrNO ([M+H]<sup>+</sup>): 316.03315, found: 316.03287.

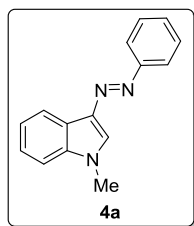

(*E*)-1-methyl-3-(phenyldiazenyl)-1*H*-indole **4a**: Yellow solid, mp 95.8-97.3 °C, <sup>1</sup>H NMR (400 MHz, CDCl<sub>3</sub>). δ: 3.89 (s, 3 H), 7.33-7.40 (m, 4 H), 7.49-7.52 (m, 2 H), 7.87-7.89 (m, 3 H), 8.57-8.59 (m, 1 H). <sup>13</sup>C NMR (100 MHz, CDCl<sub>3</sub>). δ: 33.45, 109.43, 119.47, 121.68, 122.89, 123.15, 123.98, 128.81, 128.89, 134.71, 135.47,

137.30, 153.87 ppm. HRMS (ESI) calcd. for  $C_{15}H_{14}N_3$  ( $[M+H]^+$ ): 236.11822, found: 236.11787.

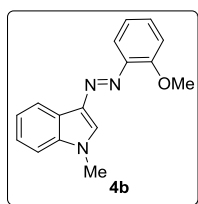

(*E*)-3-((2-methoxyphenyl)diazenyl)-1-methyl-1*H*-indole **4b**:

Yellow solid, mp 132.5-133.7 °C,  $^1H$  NMR (400 MHz,  $CDCl_3$ ).  $\delta$ : 3.86 (s, 3 H), 4.01 (s, 3 H), 7.04-7.10 (m, 2 H), 7.32-7.37 (m, 4 H), 7.72 (d,  $J = 8.8$  Hz, 1 H), 7.86 (s, 1 H), 8.59-8.61 (m, 1 H).  $^{13}C$  NMR (100 MHz,  $CDCl_3$ ).  $\delta$ : 33.38, 56.44, 109.26, 112.67, 116.15, 119.72, 120.80, 122.99, 123.11, 123.88, 130.03, 133.98, 136.41, 137.19, 143.27, 156.01 ppm. HRMS (ESI) calcd. for  $C_{16}H_{16}N_3O$  ( $[M+H]^+$ ): 266.12879, found: 266.12860.

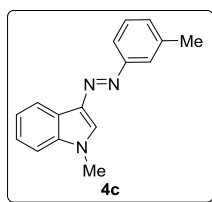

(*E*)-1-methyl-3-(*m*-tolyldiazenyl)-1*H*-indole **4c**:

Yellow solid, mp 133.7-135.8 °C,  $^1H$  NMR (400 MHz,  $CDCl_3$ ).  $\delta$ : 2.47 (s, 3 H), 3.87 (s, 3 H), 7.19-7.22 (m, 1 H), 7.32-7.41 (m, 4 H), 7.69-7.71 (m, 2 H), 7.86 (s, 1 H), 8.57-8.60 (m, 1 H).  $^{13}C$  NMR (100 MHz,  $CDCl_3$ ).  $\delta$ : 21.43, 33.41, 109.39, 119.19, 119.50, 121.94, 122.83, 123.16, 123.93, 128.71, 129.63, 134.53, 138.48, 137.29, 138.67, 153.93 ppm. HRMS (ESI) calcd. for  $C_{16}H_{16}N_3$  ( $[M+H]^+$ ): 250.13387, found: 250.13367.

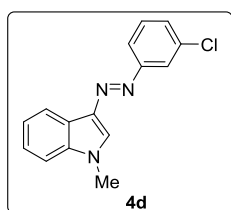

(*E*)-3-((3-chlorophenyl)diazenyl)-1-methyl-1*H*-indole **4d**:

Yellow solid, mp 137.8-138.4 °C,  $^1H$  NMR (400 MHz,  $CDCl_3$ ).  $\delta$ : 3.89 (s, 3 H), 7.31-7.37 (m, 4 H), 7.42 (t,  $J = 16$  Hz, 1 H), 7.75-7.78 (m, 1 H), 7.86-7.88 (m, 2 H), 8.52-8.54 (m, 1 H).  $^{13}C$  NMR (100 MHz,  $CDCl_3$ ).  $\delta$ : 33.53, 109.53, 119.31, 120.71, 121.14, 123.16, 123.20, 124.21, 128.41, 129.90, 134.86, 135.48, 135.61, 137.41, 154.87 ppm. HRMS (ESI) calcd. for  $C_{15}H_{13}ClN_3$  ( $[M+H]^+$ ): 270.07925, found: 270.07913.

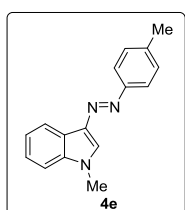

(*E*)-1-methyl-3-(*p*-tolyldiazenyl)-1*H*-indole **4e**:

Yellow solid, mp 110.0-110.9 °C,  $^1H$  NMR (400 MHz,  $CDCl_3$ ).  $\delta$ : 2.43 (s, 3 H), 3.88 (s, 3 H), 7.28-7.38 (m, 5 H), 7.81 (t, 3 H), 8.56-8.59 (m, 1 H).  $^{13}C$  NMR (100 MHz,  $CDCl_3$ ).  $\delta$ : 21.33, 33.32, 109.36, 119.54, 121.61, 122.68, 123.10, 123.82, 129.53, 134.12, 135.34, 137.24, 138.96, 151.86 ppm. HRMS (ESI) calcd. for  $C_{16}H_{16}N_3$  ( $[M+H]^+$ ): 250.13387, found: 250.13377.

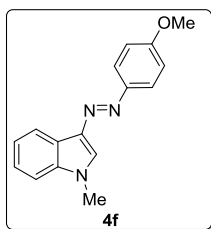

(*E*)-3-((4-methoxyphenyl)diazenyl)-1-methyl-1*H*-indole **4f**:

Yellow solid, mp 98.4-100.1 °C, <sup>1</sup>H NMR (400 MHz, CDCl<sub>3</sub>). δ: 3.86 (s, 3 H), 3.88 (s, 3 H), 7.00 (t, *J* = 5.2 Hz, 1 H), 7.02 (t, *J* = 5.2 Hz, 1 H), 7.30-7.36 (m, 3 H), 7.81-7.89 (m, 3 H), 8.56-8.59 (m, 1 H). <sup>13</sup>C NMR (100 MHz, CDCl<sub>3</sub>). δ: 33.35, 55.48, 109.36, 114.04, 119.61, 122.54, 123.06, 123.17, 123.76, 133.54, 135.21, 137.21, 148.07, 160.35 ppm. HRMS (ESI) calcd. for C<sub>16</sub>H<sub>16</sub>N<sub>3</sub>O ([M+H]<sup>+</sup>): 266.12879, found: 266.12869.

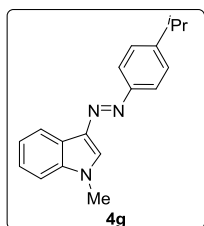

(*E*)-3-((4-isopropylphenyl)diazenyl)-1-methyl-1*H*-indole **4g**:

Yellow liquid, <sup>1</sup>H NMR (400 MHz, CDCl<sub>3</sub>). δ: 1.31 (s, 3 H), 1.32 (s, 3 H), 2.99 (m, 1 H), 3.87 (s, 3 H), 7.30-7.36 (m, 5 H), 7.80-7.84 (m, 3 H), 8.57 (d, *J* = 8.4 Hz, 1 H). <sup>13</sup>C NMR (100 MHz, CDCl<sub>3</sub>). δ: 23.97, 33.38, 34.00, 109.36, 119.61, 121.67, 122.70, 123.15, 123.84, 126.90, 134.07, 135.46, 137.27, 149.91, 152.21 ppm. HRMS (ESI) calcd. for C<sub>18</sub>H<sub>20</sub>N<sub>3</sub> ([M+H]<sup>+</sup>): 278.16517, found: 278.16483.

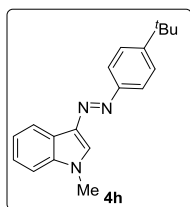

(*E*)-3-((4-*tert*-butylphenyl)diazenyl)-1-methyl-1*H*-indole **4h**:

Yellow liquid, <sup>1</sup>H NMR (400 MHz, CDCl<sub>3</sub>). δ: 1.41 (s, 9 H), 3.85 (s, 3 H), 7.32-7.39 (m, 3 H), 7.52-7.56 (m, 2 H), 7.82-7.86 (m, 3 H), 8.59-8.62 (m, 1 H). <sup>13</sup>C NMR (100 MHz, CDCl<sub>3</sub>). δ: 31.35, 33.33, 34.78, 109.35, 119.56, 121.32, 122.68, 123.12, 123.82, 125.78, 134.12, 135.44, 137.23, 151.75, 152.07 ppm. HRMS (ESI) calcd. for C<sub>19</sub>H<sub>22</sub>N<sub>3</sub> ([M+H]<sup>+</sup>): 292.18082, found: 292.18042.

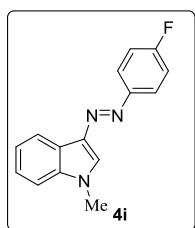

(*E*)-3-((4-fluorophenyl)diazenyl)-1-methyl-1*H*-indole **4i**:

Yellow solid, mp 124.7-125.3 °C, <sup>1</sup>H NMR (400 MHz, CDCl<sub>3</sub>). δ: 3.86 (s, 3 H), 7.15-7.21 (m, 2 H), 7.32-7.39 (m, 3 H), 7.83 (s, 1 H), 7.86-7.91 (m, 2 H), 8.55-8.57 (m, 1 H). <sup>13</sup>C NMR (100 MHz, CDCl<sub>3</sub>). δ: 33.89, 109.45, 115.68 (*J*<sub>C-F</sub> = 23 Hz), 122.88, 123.05, 123.32 (d, *J*<sub>C-F</sub> = 8.5 Hz), 123.99, 134.64, 135.26, 137.30, 150.34, 163.02 (d, *J*<sub>C-F</sub> = 247 Hz) ppm. HRMS (ESI) calcd. for C<sub>15</sub>H<sub>13</sub>FN<sub>3</sub> ([M+H]<sup>+</sup>): 254.10880, found: 254.10854.

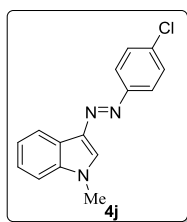

(*E*)-3-((4-chlorophenyl)diazenyl)-1-methyl-1*H*-indole **4j**: Yellow solid, mp 130.2-130.4 °C,  $^1\text{H}$  NMR (400 MHz,  $\text{CDCl}_3$ ).  $\delta$ : 3.80 (s, 3 H), 7.22-7.35 (m, 3 H), 7.42 (d,  $J = 8.8$  Hz, 2 H), 7.79 (d,  $J = 8.8$  Hz, 3 H), 8.52 (d,  $J = 6$  Hz, 1 H).  $^{13}\text{C}$  NMR (100 MHz,  $\text{CDCl}_3$ ).  $\delta$ : 33.42, 109.50, 119.36, 122.89, 123.05, 123.07, 124.09, 129.02, 134.22, 135.14, 135.38, 137.34, 152.23 ppm. HRMS (ESI) calcd. for  $\text{C}_{15}\text{H}_{13}\text{ClN}_3$  ( $[\text{M}+\text{H}]^+$ ): 270.07925, found: 270.07916.

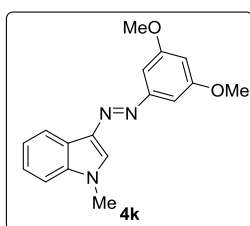

(*E*)-3-((3,5-dimethoxyphenyl)diazenyl)-1-methyl-1*H*-indole **4k**. Orange red solid, mp 142.8-143.6 °C,  $^1\text{H}$  NMR (400 MHz,  $\text{CDCl}_3$ ).  $\delta$ : 3.86 (s, 3 H), 3.96 (s, 3 H), 4.00 (s, 3 H), 6.99 (d,  $J = 8.4$  Hz, 1 H), 7.30-7.34 (m, 3 H), 7.51 (d,  $J = 2$  Hz, 1 H), 7.54 (dd,  $J = 8.4$  Hz, 1 H), 7.82 (s, 1 H), 8.58 (d,  $J = 6.4$  Hz, 1 H).  $^{13}\text{C}$  NMR (100 MHz,  $\text{CDCl}_3$ ).  $\delta$ : 33.34, 55.86, 56.02, 101.71, 109.36, 110.56, 118.02, 119.60, 122.56, 123.09, 123.79, 133.58, 135.16, 137.24, 148.12, 149.43, 150.04 ppm. MS  $m/z$ : 295.

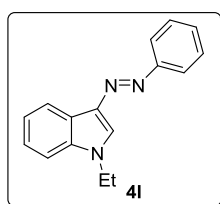

(*E*)-1-ethyl-3-(phenyldiazenyl)-1*H*-indole **4l**. Yellow liquid,  $^1\text{H}$  NMR (400 MHz,  $\text{CDCl}_3$ ).  $\delta$ : 1.55-1.59 (t, 3 H), 4.25 (q, 2 H), 7.32-7.40 (m, 4 H), 7.48-7.53 (m, 2 H), 7.92 (t, 3 H), 8.60 (t,  $J = 8.4$  Hz, 1 H).  $^{13}\text{C}$  NMR (100 MHz,  $\text{CDCl}_3$ ).  $\delta$ : 15.09, 41.55, 109.52, 119.73, 121.67, 122.87, 123.23, 123.88, 128.77, 128.90, 132.97, 135.60, 136.45, 153.91 ppm. HRMS (ESI) calcd. for  $\text{C}_{16}\text{H}_{16}\text{N}_3$  ( $[\text{M}+\text{H}]^+$ ): 250.13387, found: 250.13365.

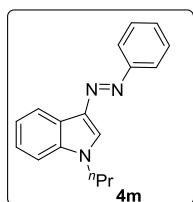

(*E*)-3-(phenyldiazenyl)-1-propyl-1*H*-indole **4m**. Yellow liquid,  $^1\text{H}$  NMR (400 MHz,  $\text{CDCl}_3$ ).  $\delta$ : 1.01 (t, 3 H), 1.92-2.01 (m, 2 H), 4.16 (t, 2 H), 7.32-7.41 (m, 4 H), 7.49-7.53 (m, 2 H), 7.91 (t, 3 H), 8.61 (t,  $J = 8.8$  Hz, 1 H).  $^{13}\text{C}$  NMR (100 MHz,  $\text{CDCl}_3$ ).  $\delta$ : 11.39, 23.14, 48.56, 109.64, 119.70, 121.67, 122.81, 123.21, 123.84, 128.75, 128.88, 133.79, 135.48, 136.72, 153.94 ppm. HRMS (ESI) calcd. for  $\text{C}_{17}\text{H}_{18}\text{N}_3$  ( $[\text{M}+\text{H}]^+$ ): 264.14952, found: 264.14932.

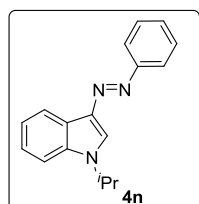

(*E*)-1-isopropyl-3-(phenyldiazenyl)-1*H*-indole **4n**. Yellow solid, mp 134.0-134.3 °C,  $^1\text{H}$  NMR (400 MHz,  $\text{CDCl}_3$ ).  $\delta$ : 1.62 (s, 3 H),

1.64 (s, 3 H), 4.69-4.4.79 (m, 1 H), 7.31-7.43 (m, 4 H), 7.47-7.52 (m, 2 H), 7.89 (d, 2 H), 8.06 (s, 1 H), 8.61 (q,  $J = 8.8$  Hz, 1 H).  $^{13}\text{C}$  NMR (100 MHz,  $\text{CDCl}_3$ ).  $\delta$ : 22.64, 47.65, 109.65, 119.69, 121.64, 122.88, 123.22, 123.76, 128.72, 128.89, 130.05, 135.77, 136.34, 153.95 ppm. HRMS (ESI) calcd. for  $\text{C}_{17}\text{H}_{18}\text{N}_3$  ( $[\text{M}+\text{H}]^+$ ): 264.14952, found: 264.14926.

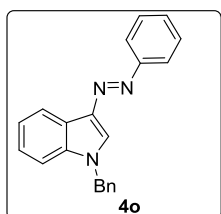

(*E*)-1-phenyl-3-(phenyldiazenyl)-1*H*-indole **4o**: Red liquid,  $^1\text{H}$  NMR (400 MHz,  $\text{CDCl}_3$ ).  $\delta$ : 5.39 (s, 2 H), 7.23-7.26 (m, 2 H), 7.29-7.40 (m, 7 H), 7.47-7.51 (m, 2 H), 7.88-7.96 (m, 3 H), 8.60 (d,  $J = 9.6$  Hz, 1 H).  $^{13}\text{C}$  NMR (100 MHz,  $\text{CDCl}_3$ ).  $\delta$ : 50.74, 109.99, 121.72, 123.09, 123.23, 124.16, 127.15, 128.17, 128.91, 128.95, 129.01, 133.99, 135.85, 136.96 ppm. HRMS (ESI) calcd. for  $\text{C}_{21}\text{H}_{18}\text{N}_3$  ( $[\text{M}+\text{H}]^+$ ): 312.14952, found: 312.14923.

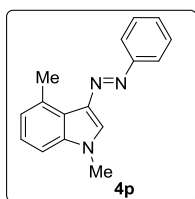

(*E*)-1,4-dimethyl-3-(phenyldiazenyl)-1*H*-indole **4p**: Red solid, mp 93.1-95.7  $^\circ\text{C}$ ,  $^1\text{H}$  NMR (400 MHz,  $\text{CDCl}_3$ ).  $\delta$ : 2.96 (s, 3 H), 3.84 (s, 3 H), 7.12-7.14 (m, 1 H), 7.20-7.26 (m, 2 H), 7.37-7.42 (m, 1 H), 7.49-7.53 (m, 2 H), 7.65 (s, 1 H), 7.88-7.90 (m, 2 H).  $^{13}\text{C}$  NMR (100 MHz,  $\text{CDCl}_3$ ).  $\delta$ : 20.79, 33.51, 107.49, 117.20, 122.02, 122.71, 123.21, 124.67, 128.94, 129.00, 132.17, 136.92, 137.14, 153.59 ppm. HRMS (ESI) calcd. For  $\text{C}_{16}\text{H}_{16}\text{N}_3$  ( $[\text{M}+\text{H}]^+$ ): 250.13387, found: 250.13370.

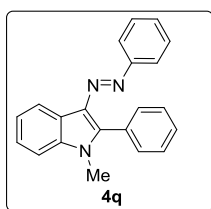

(*E*)-1-methyl-2-phenyl-3-(phenyldiazenyl)-1*H*-indole **4q**: Yellow solid, mp 147.4-147.6  $^\circ\text{C}$ ,  $^1\text{H}$  NMR (400 MHz,  $\text{CDCl}_3$ ).  $\delta$ : 3.84 (s, 3 H), 7.32-7.36 (m, 1 H), 7.40-7.48 (m, 5 H), 7.52-7.60 (m, 3 H), 7.67-7.70 (m, 2 H), 7.82-7.85 (m, 2 H), 8.74-8.76 (m, 1 H).  $^{13}\text{C}$  NMR (100 MHz,  $\text{CDCl}_3$ ).  $\delta$ : 31.48, 109.51, 118.81, 121.89, 123.28, 123.33, 124.03, 127.99, 128.46, 128.75, 128.86, 129.65, 131.63, 132.66, 137.45, 146.21, 154.24 ppm. HRMS (ESI) calcd. for  $\text{C}_{21}\text{H}_{18}\text{N}_3$  ( $[\text{M}+\text{H}]^+$ ): 312.14952, found: 312.14908.

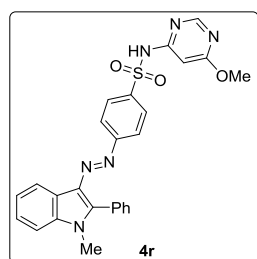

(*E*)-*N*-(6-methoxypyrimidin-4-yl)-4-((1-methyl-2-phenyl-1*H*-indol-3-yl)diazenyl)benzenesulfonamide **4r** was obtained. Red solid (1.22 g, 95%), mp 248.6-250.0  $^\circ\text{C}$ ,  $^1\text{H}$  NMR (400 MHz,

DMSO-*d*<sub>6</sub>).  $\delta$ : 3.84 (s, 6 H), 6.36 (d,  $J = 0.4$  Hz, 1 H), 7.35-7.44 (m, 2 H), 7.59-7.64 (m, 3 H), 7.70 (d,  $J = 8$  Hz, 1 H), 7.74-7.79 (m, 4 H), 7.99 (d,  $J = 8.8$  Hz, 2 H), 8.42 (s, 1 H), 8.51 (d,  $J = 7.6$  Hz, 1 H), 12.23 (s, 1 H). <sup>13</sup>C NMR (100 MHz, DMSO-*d*<sub>6</sub>).  $\delta$ : 31.97, 54.43, 91.07, 111.19, 117.85, 121.76, 122.67, 124.11, 124.79, 128.33, 128.38, 128.79, 129.67, 131.74, 137.50, 148.43, 156.17, 158.62, 170.13 ppm. HRMS (ESI) calcd. for C<sub>26</sub>H<sub>23</sub>N<sub>6</sub>O<sub>3</sub>S ([M+H]<sup>+</sup>): 499.15469, found: 499.15427.

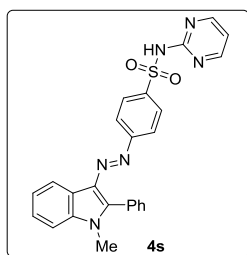

(*E*)-4-((1-methyl-2-phenyl-1*H*-indol-3-yl)diazenyl)-*N*-(pyrimidin-2-yl)benzenesulfonamide **4s** was obtained. Red solid (2.21 g, 94%), mp 254.9-256.3 °C, <sup>1</sup>H NMR (400 MHz, DMSO-*d*<sub>6</sub>).  $\delta$ : 3.82 (s, 3 H), 7.03 (t,  $J = 9.6$  Hz, 1 H), 7.35-7.44 (m, 2 H), 7.56-7.64 (m, 3 H), 7.68 (d,  $J = 8$  Hz, 1 H), 7.73-7.77 (m, 4 H), 8.05 (d,  $J = 8.4$  Hz, 2 H), 8.50 (t,  $J = 8.8$  Hz, 3 H),

11.88 (s, 1 H). <sup>13</sup>C NMR (100 MHz, DMSO-*d*<sub>6</sub>).  $\delta$ : 31.98, 111.20, 115.97, 117.89, 121.47, 122.71, 124.13, 124.81, 128.41, 128.82, 129.06, 129.69, 131.77, 132.73, 137.51, 139.32, 148.41, 156.21, 157.05, 158.55 ppm. HRMS (ESI) calcd. for C<sub>25</sub>H<sub>21</sub>N<sub>6</sub>O<sub>2</sub>S ([M+H]<sup>+</sup>): 469.14412, found: 469.14380.

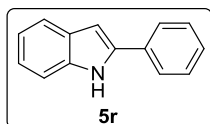

2-phenyl-1*H*-indole **5r** (48 mg, 83%): <sup>1</sup>H NMR (400 MHz, CDCl<sub>3</sub>).  $\delta$ : 6.85 (d,  $J = 4$  Hz, 1 H), 7.12-7.16 (m, 1 H), 7.19-7.23 (m, 1 H), 7.34 (t,  $J = 16$  Hz, 1 H), 7.40-7.48 (m, 3 H), 7.64-7.69 (m, 3 H), 8.34 (s, 1 H). <sup>13</sup>C NMR (100 MHz, CDCl<sub>3</sub>).  $\delta$ : 99.94, 110.87, 120.24, 120.64, 122.32, 125.12, 127.69, 128.98, 129.00, 129.21, 132.32, 136.75, 137.83 ppm. HRMS (ESI) calcd. for C<sub>14</sub>H<sub>12</sub>N ([M+H]<sup>+</sup>): 194.09643, found: 194.09610.

## VIII. References

- [1] Ibad, M. F.; Zinad, D. S.; Hussain, M.; Ali, A.; Villinger, A.; Langer, P. *Tetrahedron*, 2013, **69**, 7492-7504.
- [2] Xu, Z. M.; Xu, Y. L.; Lu, H. F.; Yang, T.; Lin, X. C.; Shao, L. M.; Ren, F. *Tetrahedron*, 2015, **71**, 2616-2621.
- [3] Zhang, L.; Li, P. H.; Liu, C.; Yang, J.; Wang, M.; Wang, L. *Catal. Sci. Technol.*, 2014, **4**, 1979-1988.
- [4] Nandi, D.; Jhou, Y. M.; Lee, J. Y.; Kuo, B. C.; Liu, C. Y.; Huang, P. W.; Lee, H. M. *J. Org. Chem.*, 2012, **77**, 9384-9390.
- [5] Liu, C.; Miao, T.; Zhang, L.; Li, P. H.; Zhang, Y. C.; Wang, L. *Chem. Asian J.*, 2014, **9**, 2584-2589.
- [6] Fu, W. C.; So, C. M.; Chow, W. K.; Yuen, O. Y.; Kwong, F. Y. *Org. Lett.*, 2015, **17**, 4612-4615.
- [7] Lebrasseur, N.; Larrosa, I. *J. Am. Chem. Soc.*, 2008, **130**, 2926-2927.
- [8] Alsabeh, P. G.; Lundgren, R. J.; Longobardi, L. E.; Stradiotto, M. *Chem. Commun.*, 2011, **47**, 6936-6938.
- [9] Zhao, J.; Zhang, Y.; Cheng, K. *J. Org. Chem.*, 2008, **73**, 7428-7431.
- [10] Haddach, A. A.; Kelleman, A.; Deaton-Rewolinski, M. V. *Tetrahedron Lett.*, 2002, **43**, 399-402.



# IX. Copies of $^1\text{H}$ NMR and $^{13}\text{C}$ NMR

## $^1\text{H}$ NMR

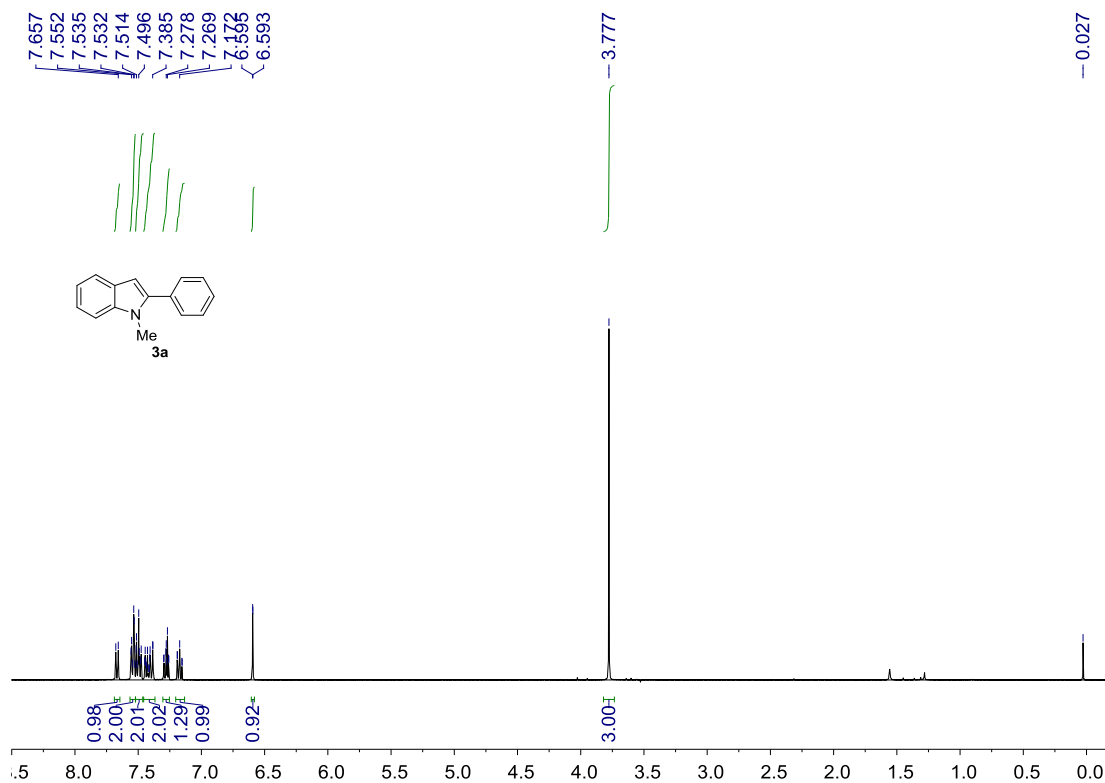

## $^{13}\text{C}$ NMR

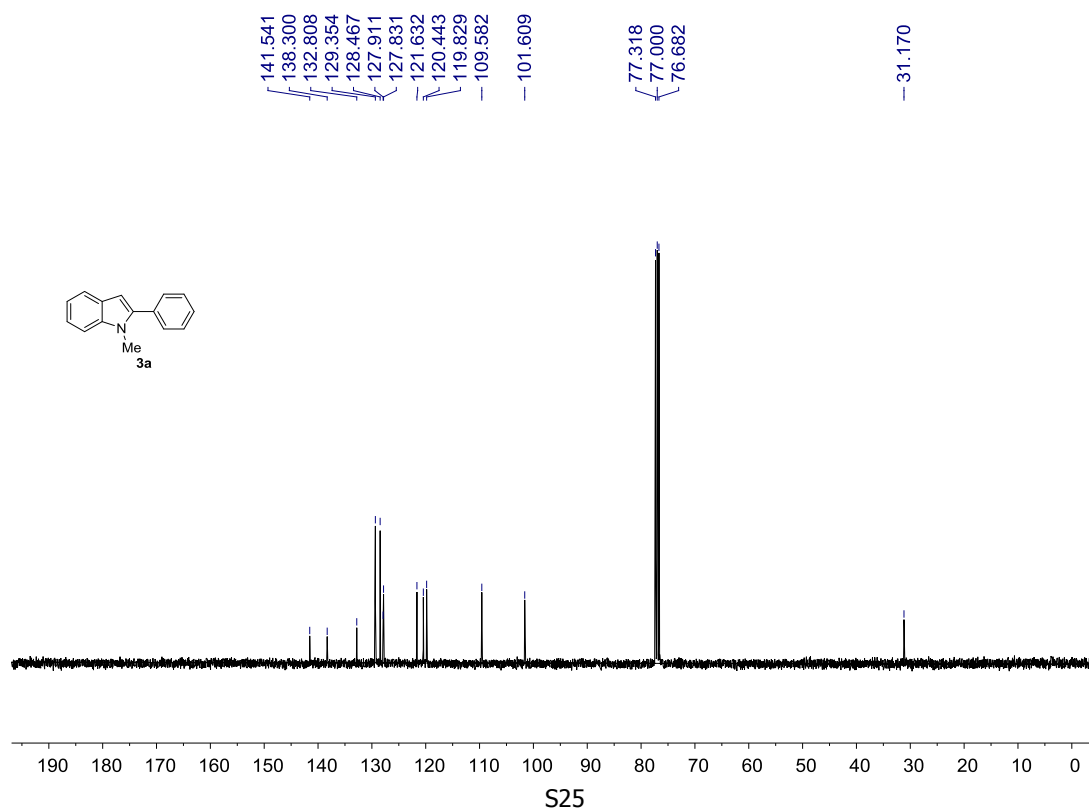

# <sup>1</sup>H NMR

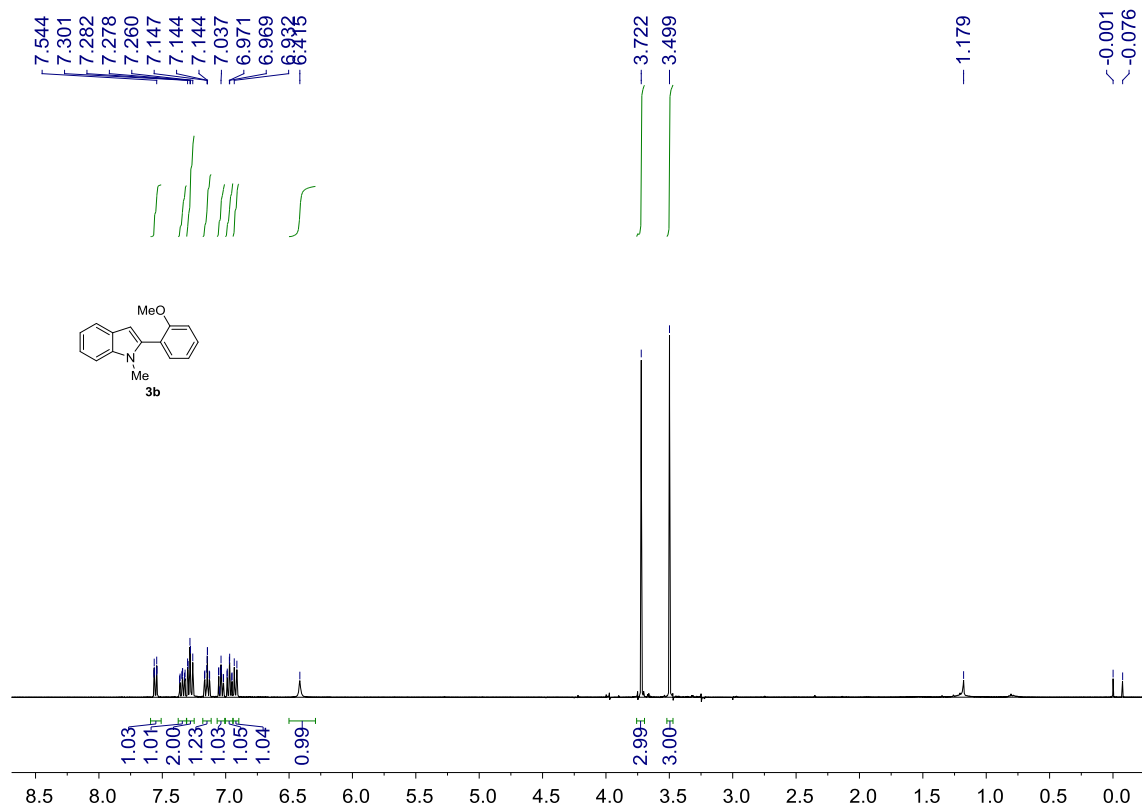

# <sup>13</sup>C NMR

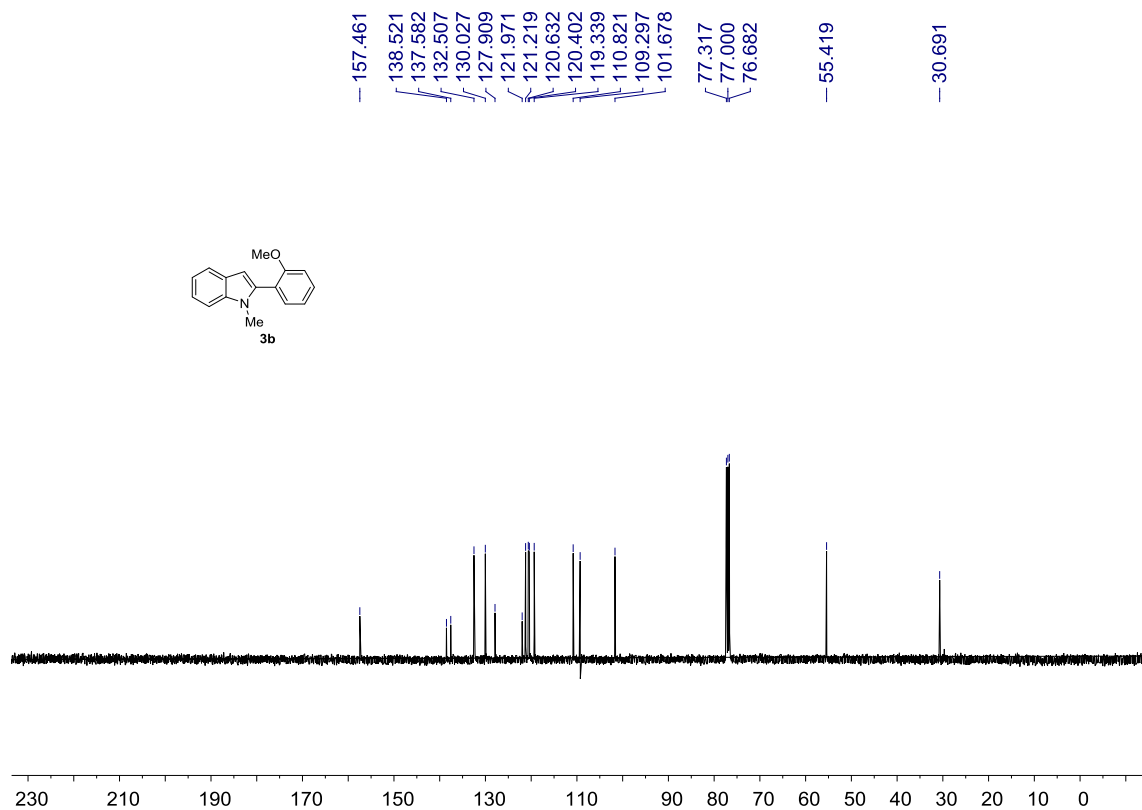

# <sup>1</sup>H NMR

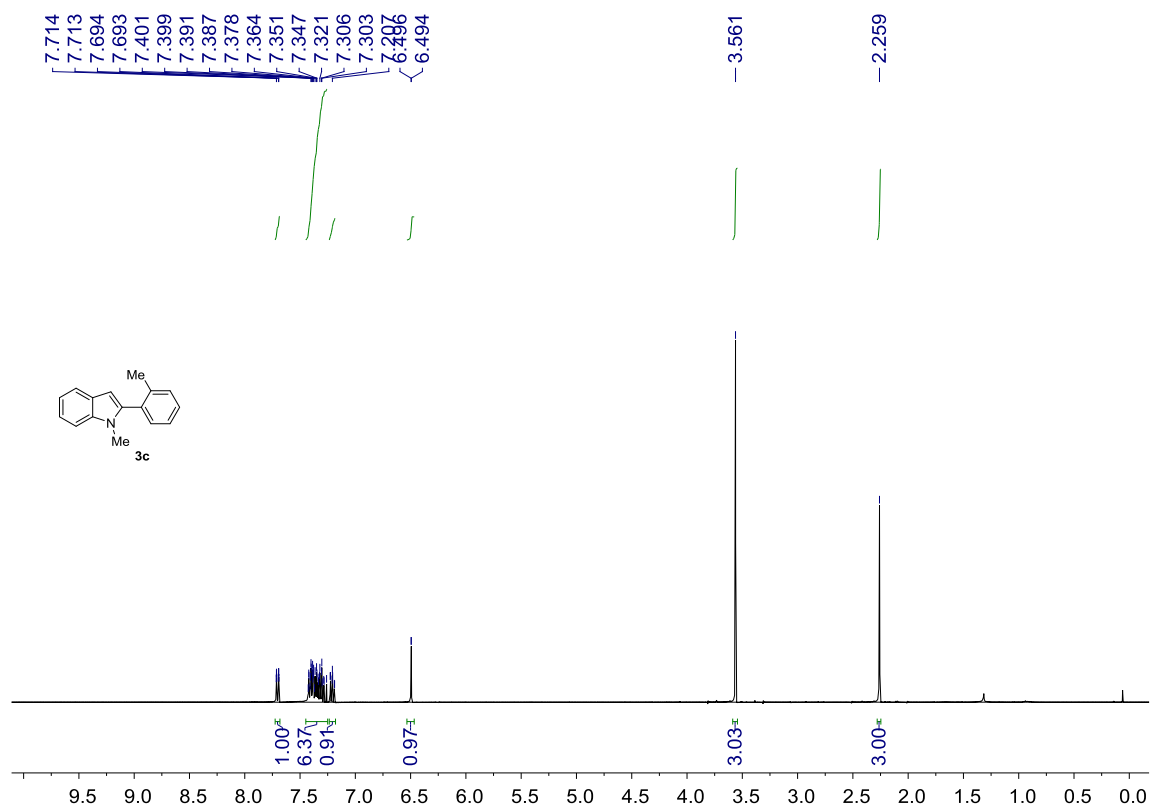

# <sup>13</sup>C NMR

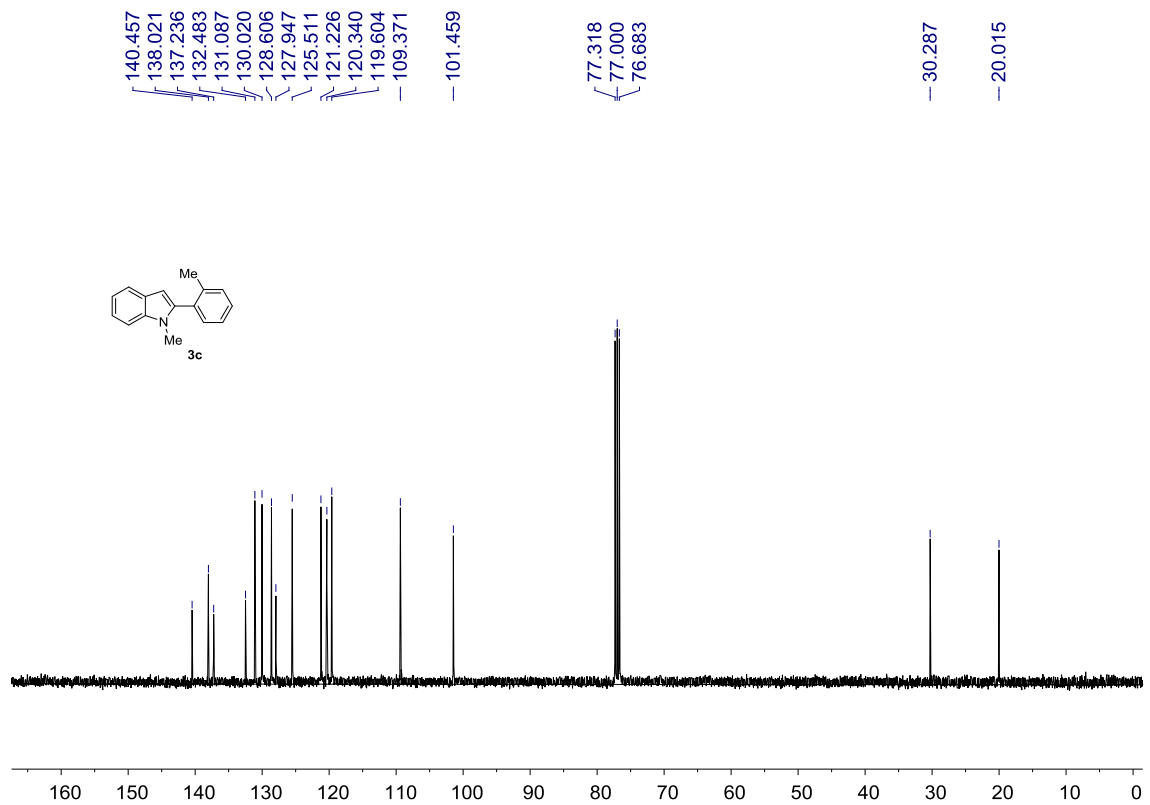

# <sup>1</sup>H NMR

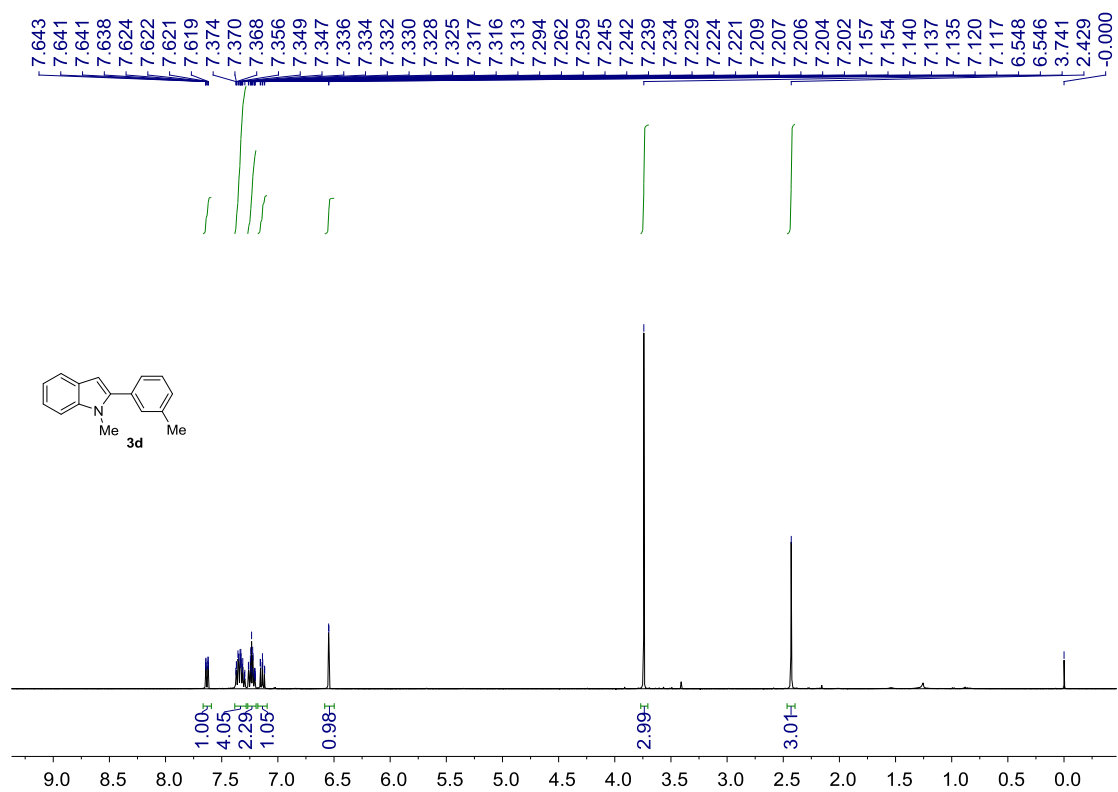

# <sup>13</sup>C NMR

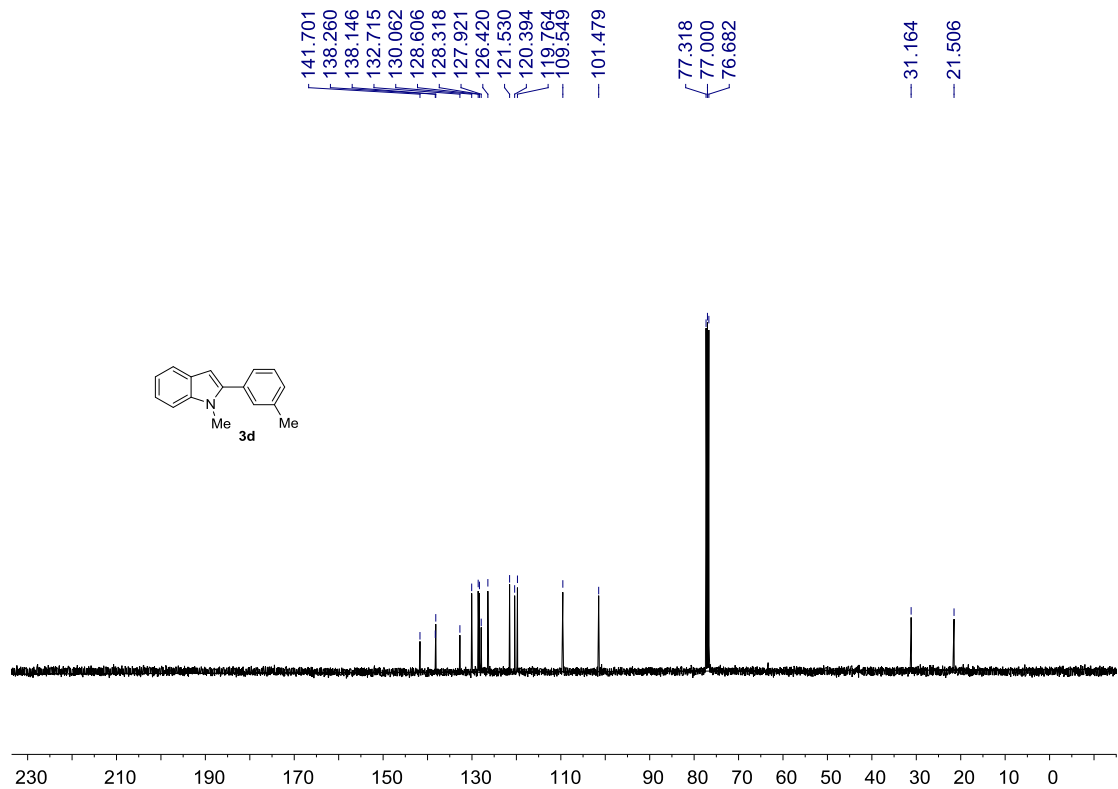

# <sup>1</sup>H NMR

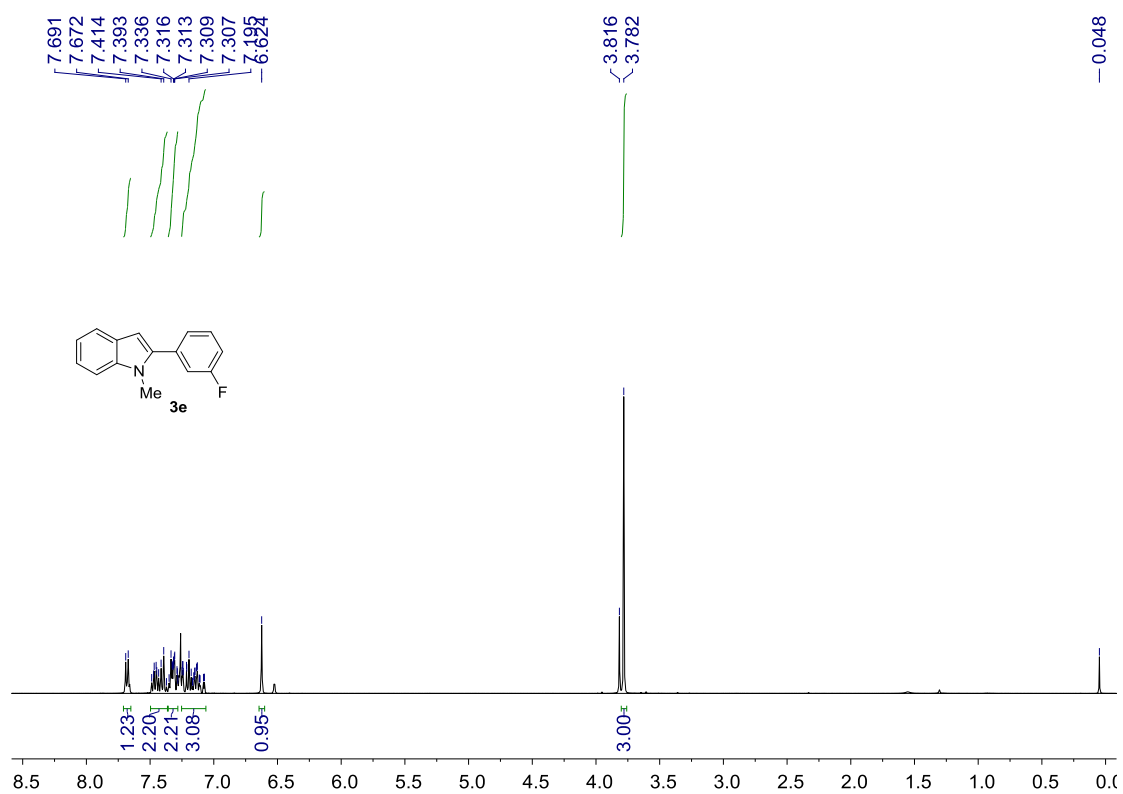

# <sup>13</sup>C NMR

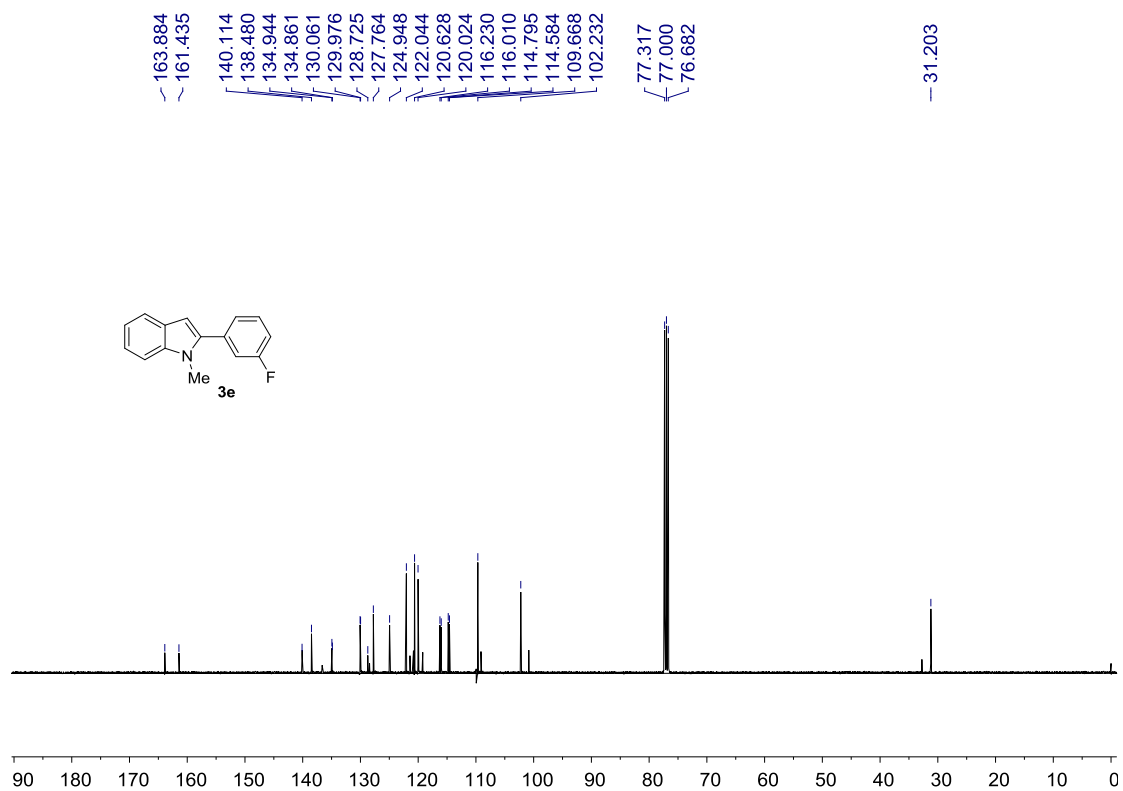

# <sup>1</sup>H NMR

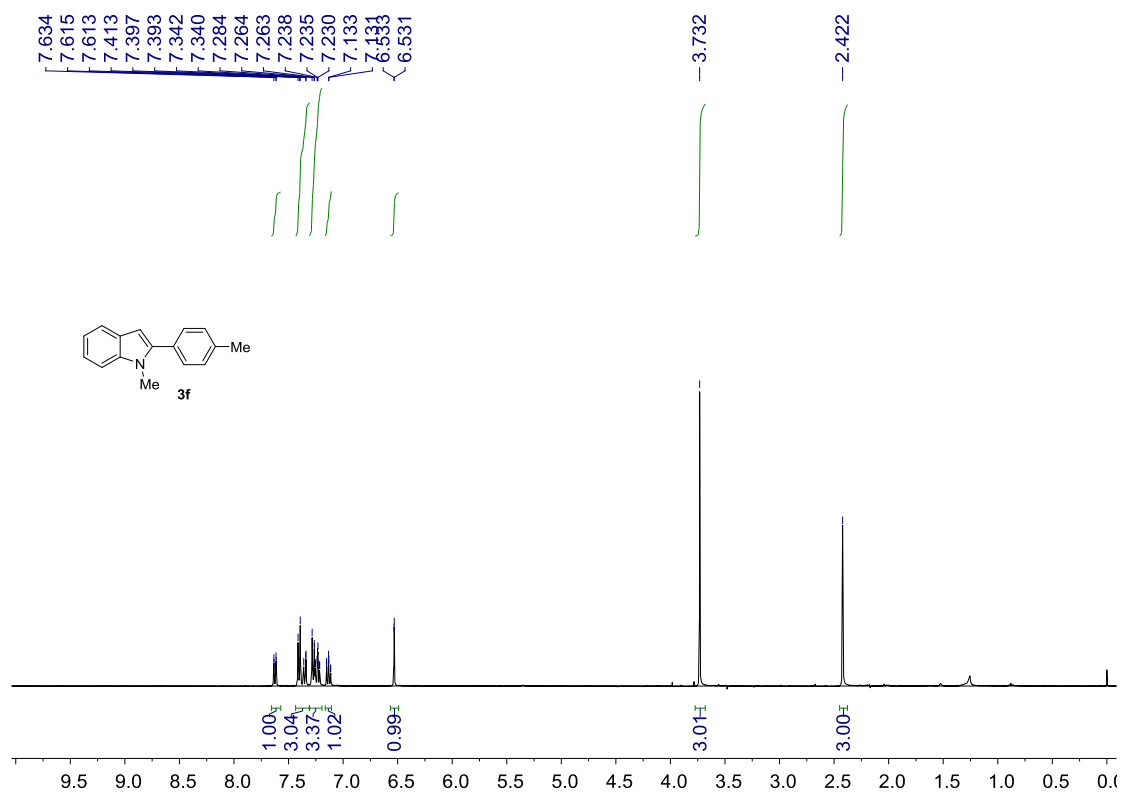

# <sup>13</sup>C NMR

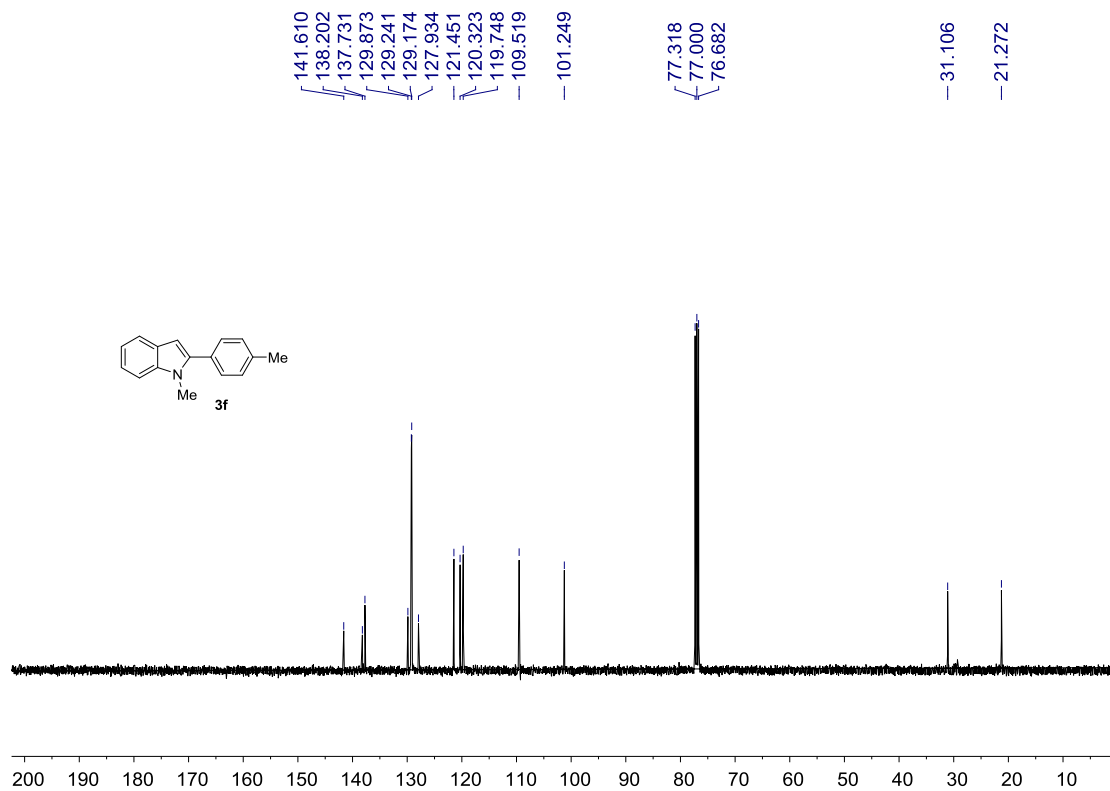

# <sup>1</sup>H NMR

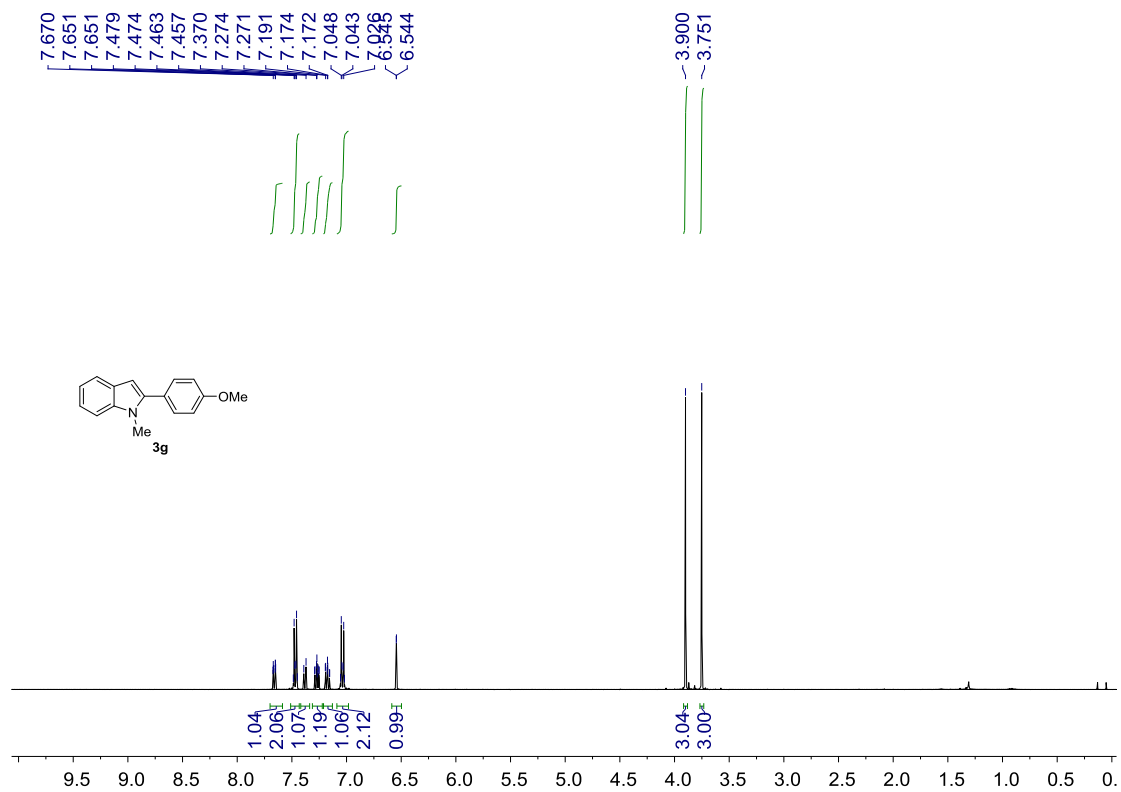

# <sup>13</sup>C NMR

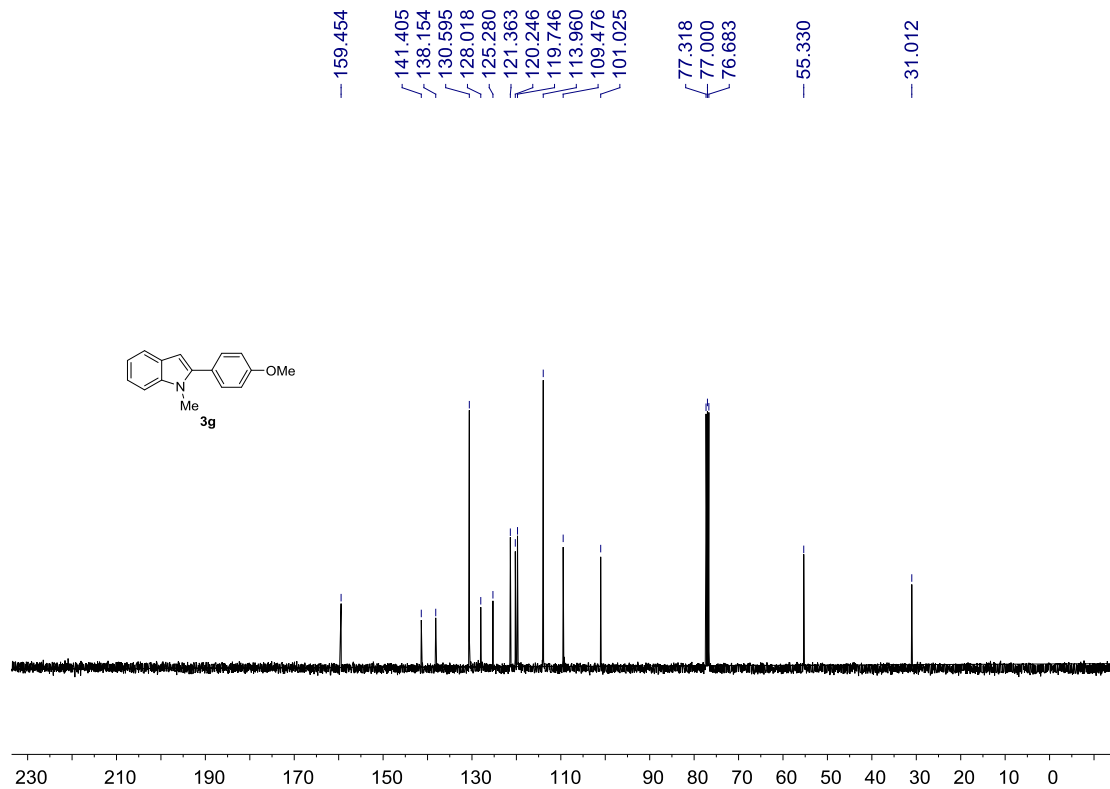

# <sup>1</sup>H NMR

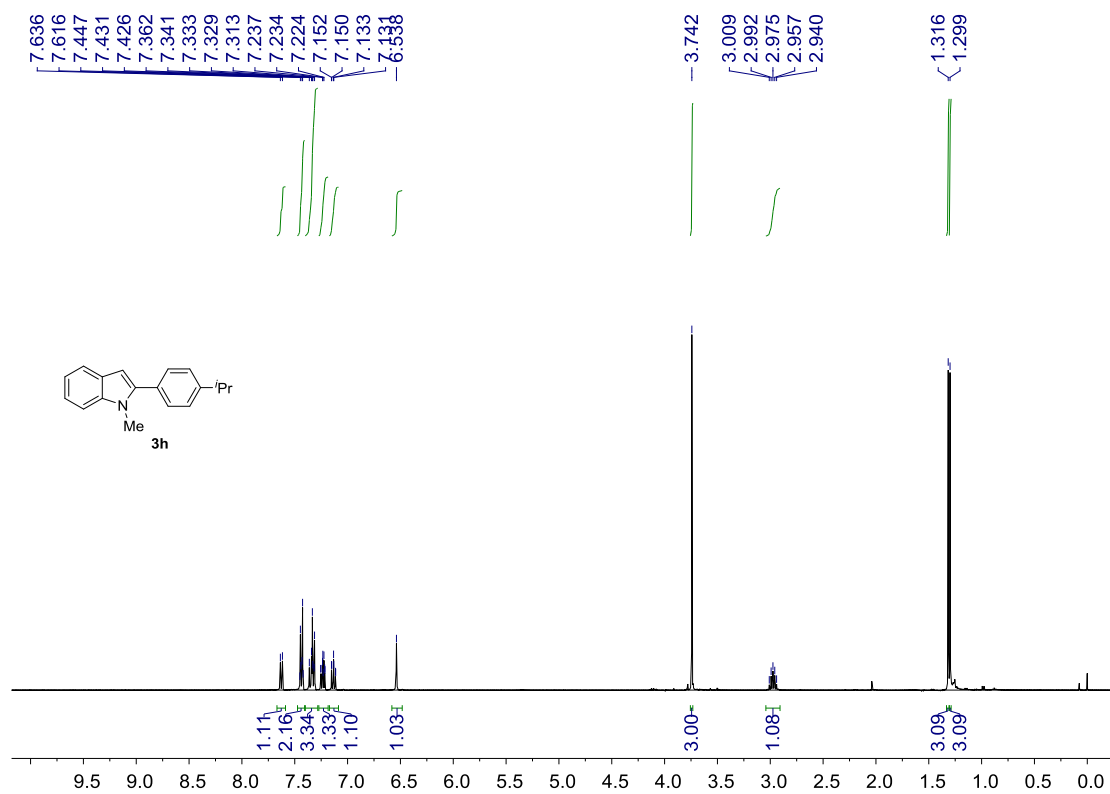

# <sup>13</sup>C NMR

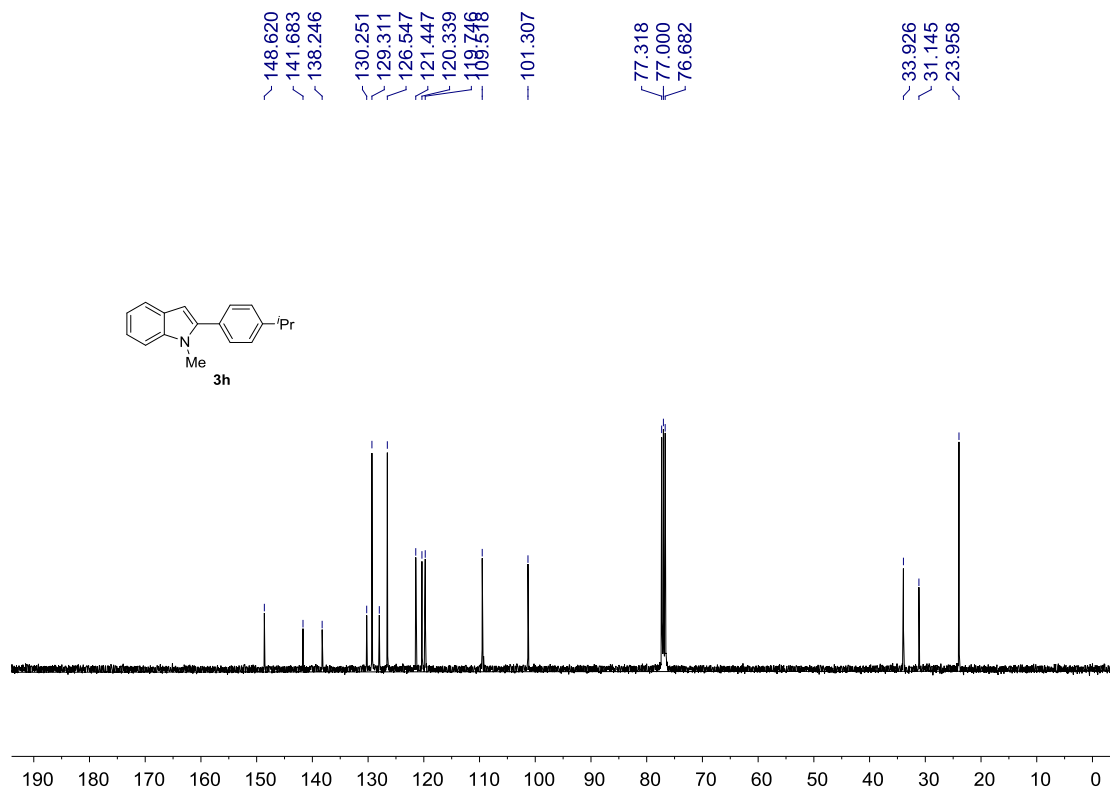



# <sup>1</sup>H NMR

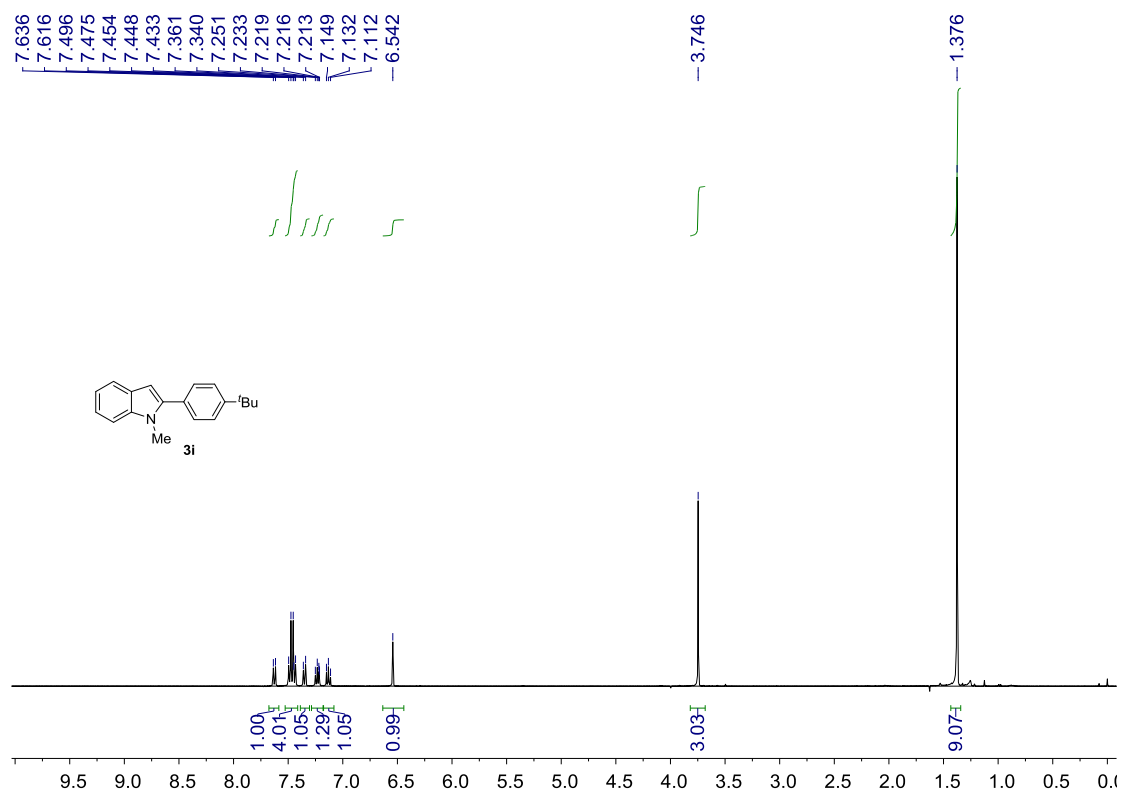

# <sup>13</sup>C NMR

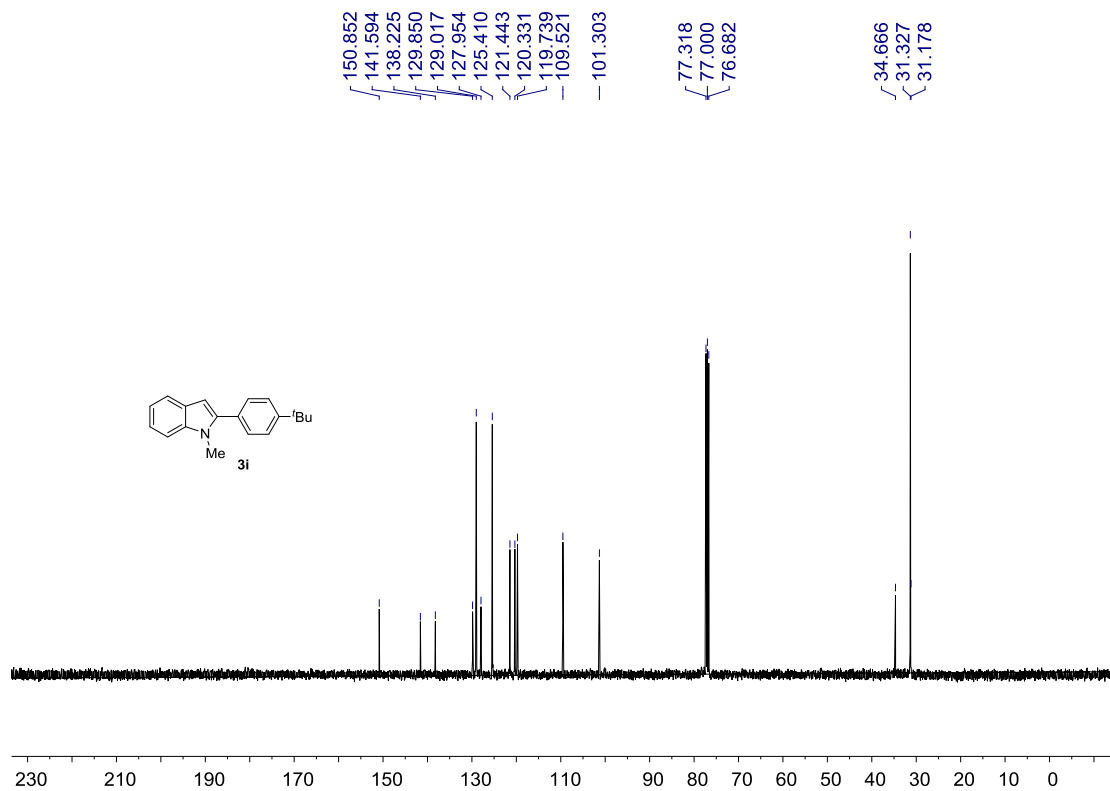

# <sup>1</sup>H NMR

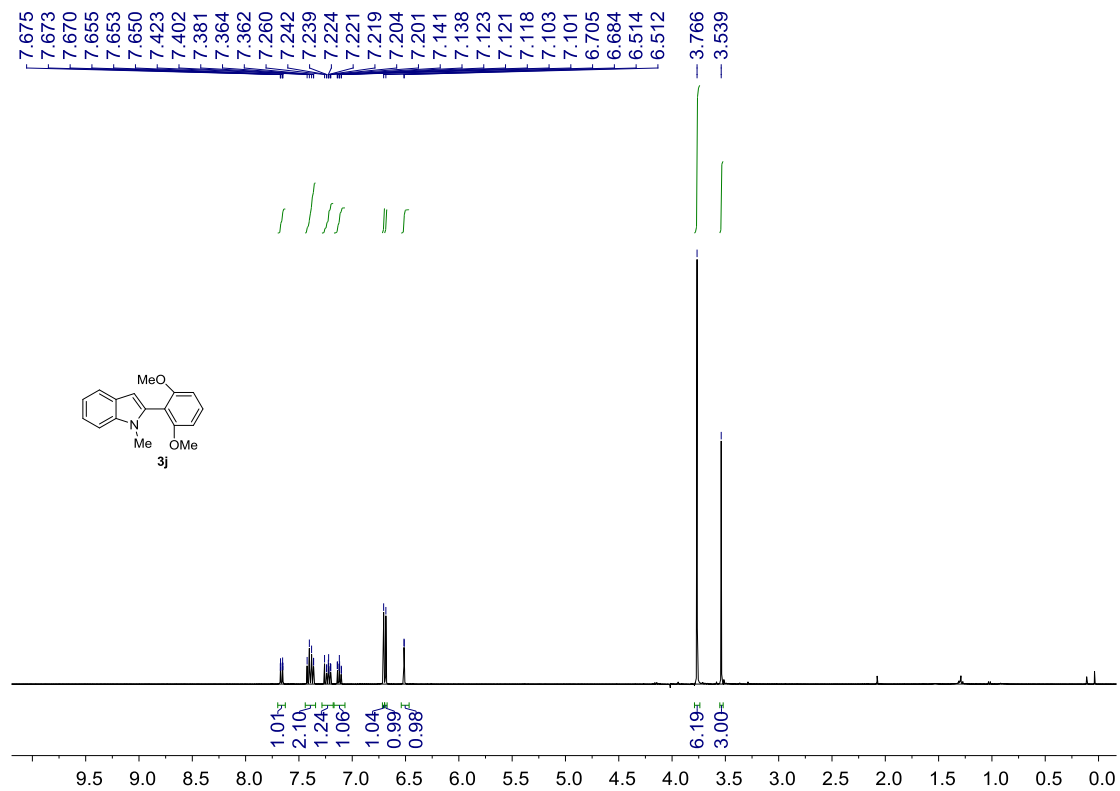

# <sup>13</sup>C NMR

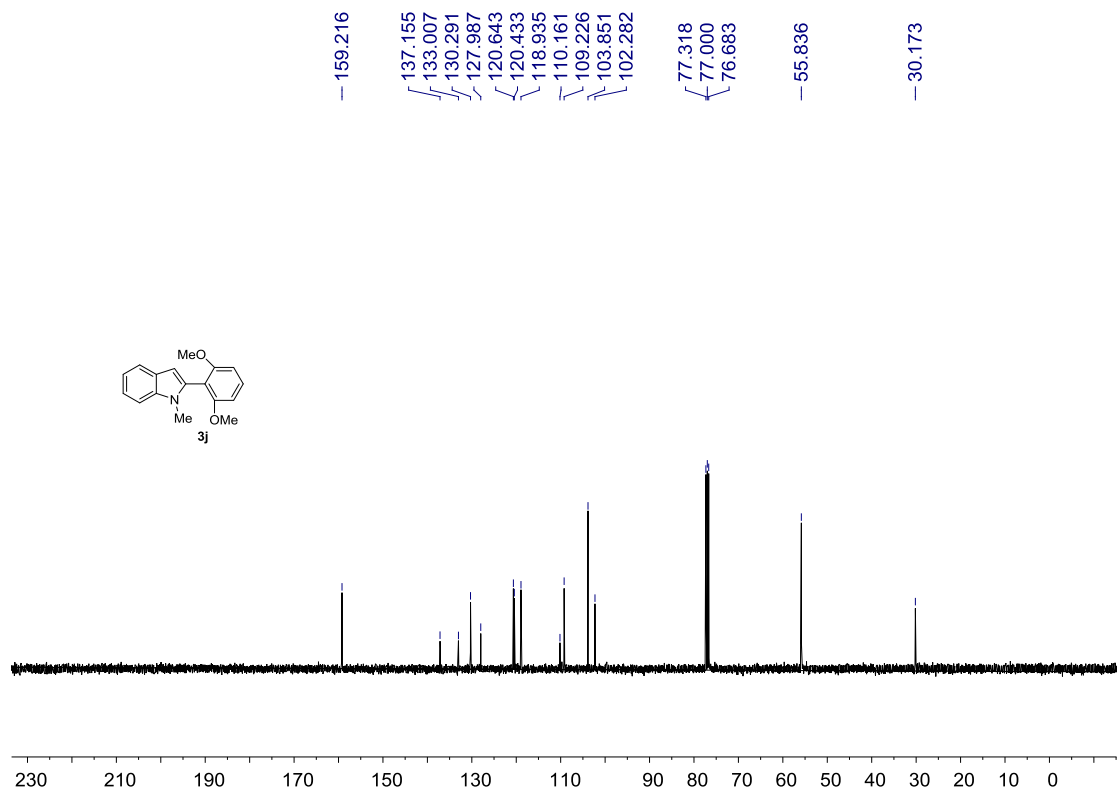

# <sup>1</sup>H NMR

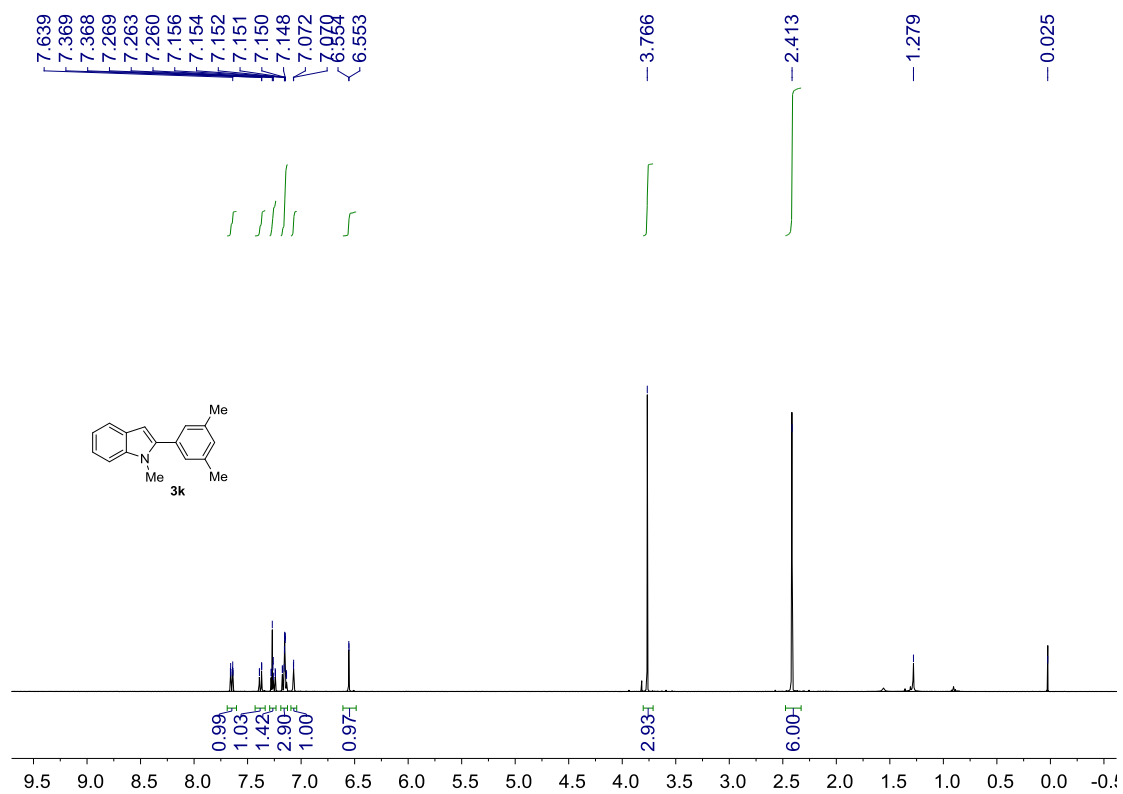

# <sup>13</sup>C NMR

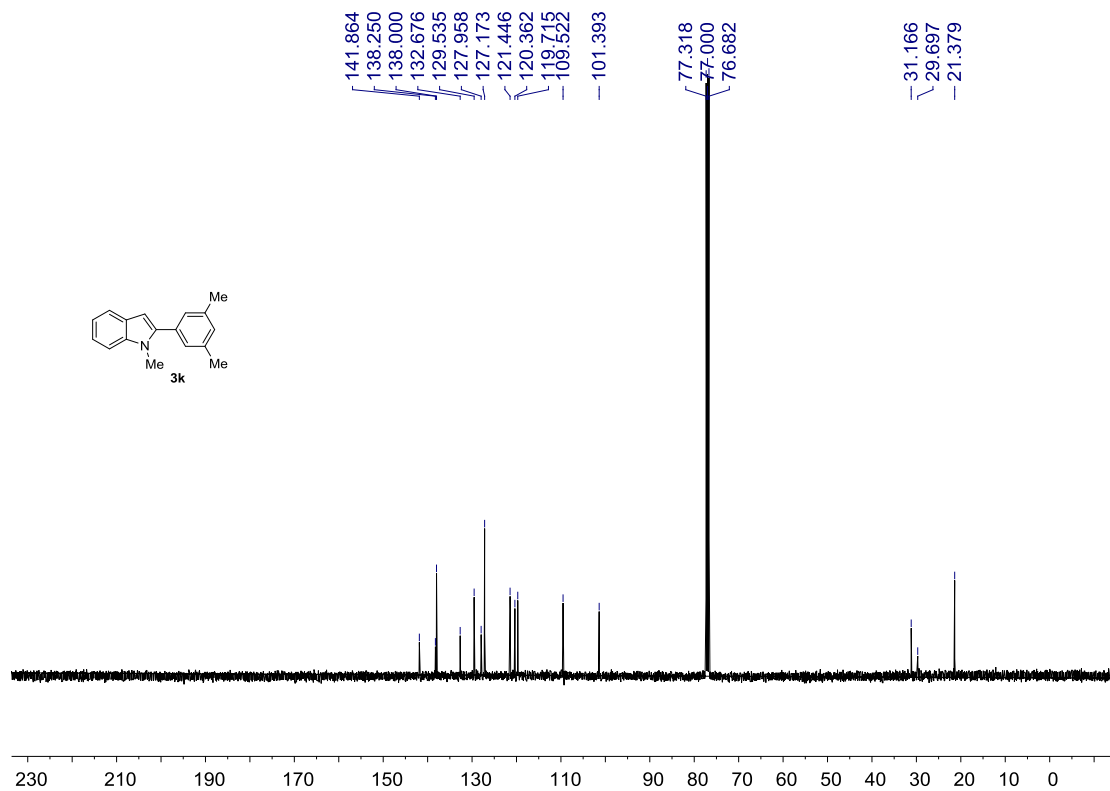

# <sup>1</sup>H NMR

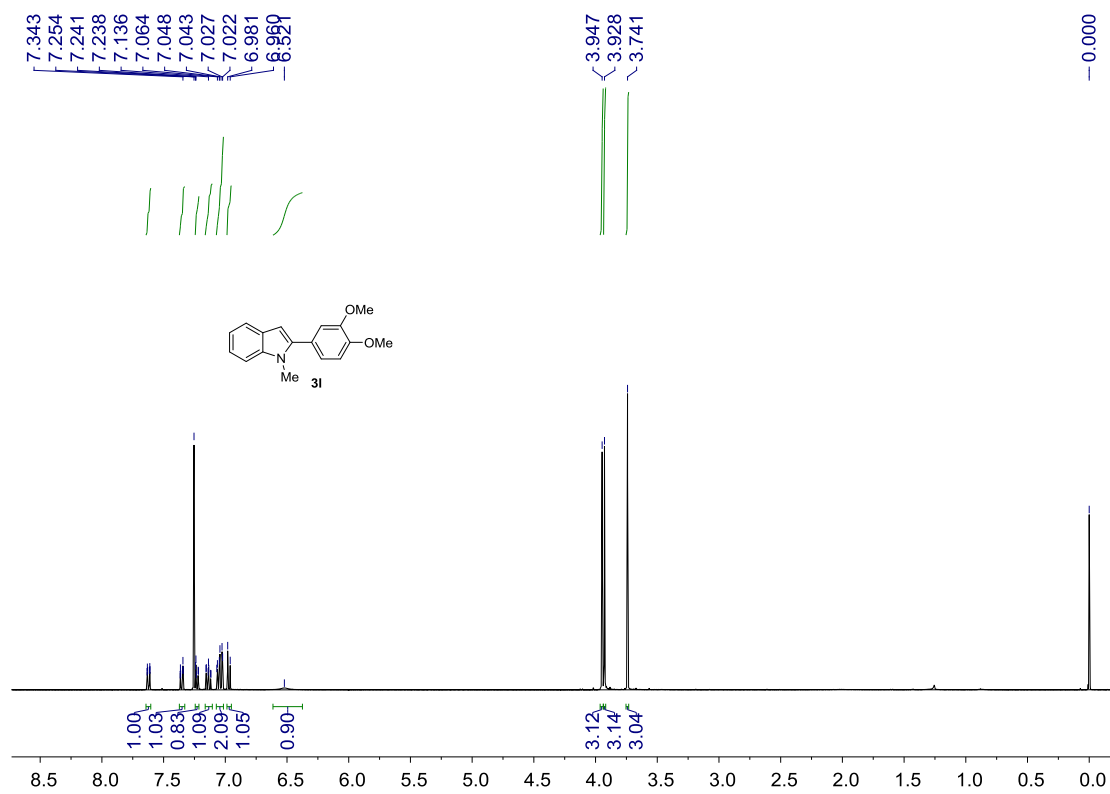

# <sup>13</sup>C NMR

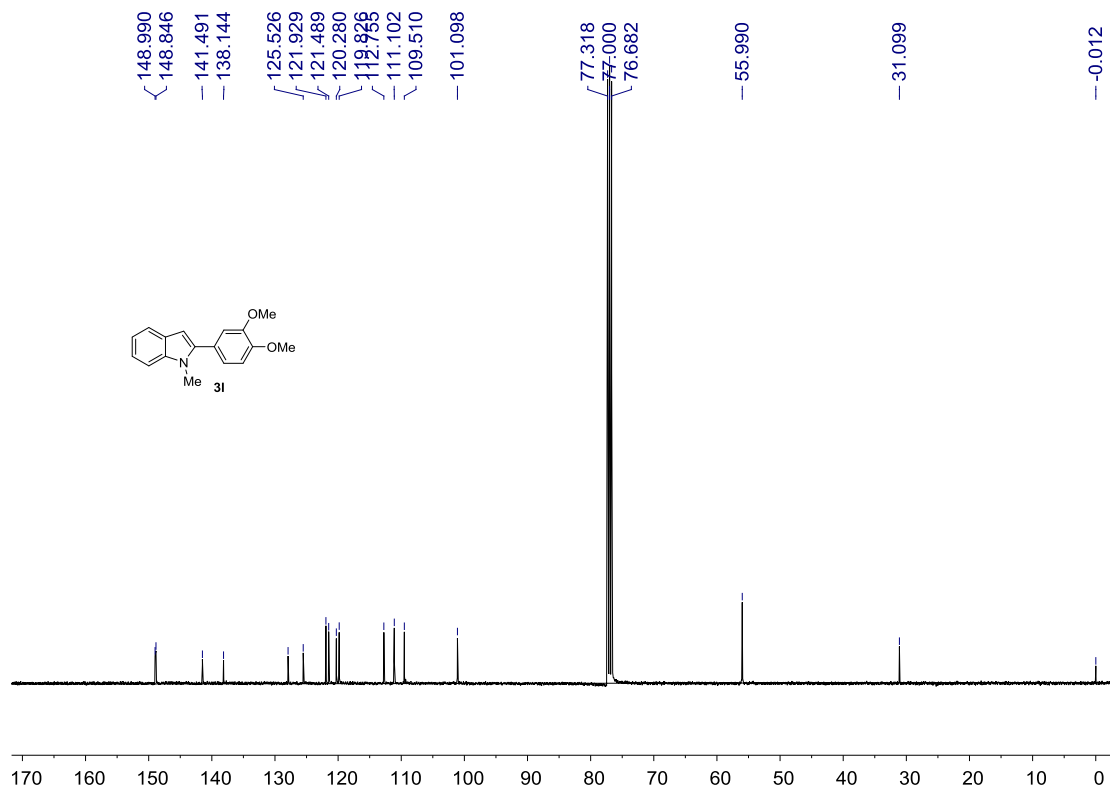

# <sup>1</sup>H NMR

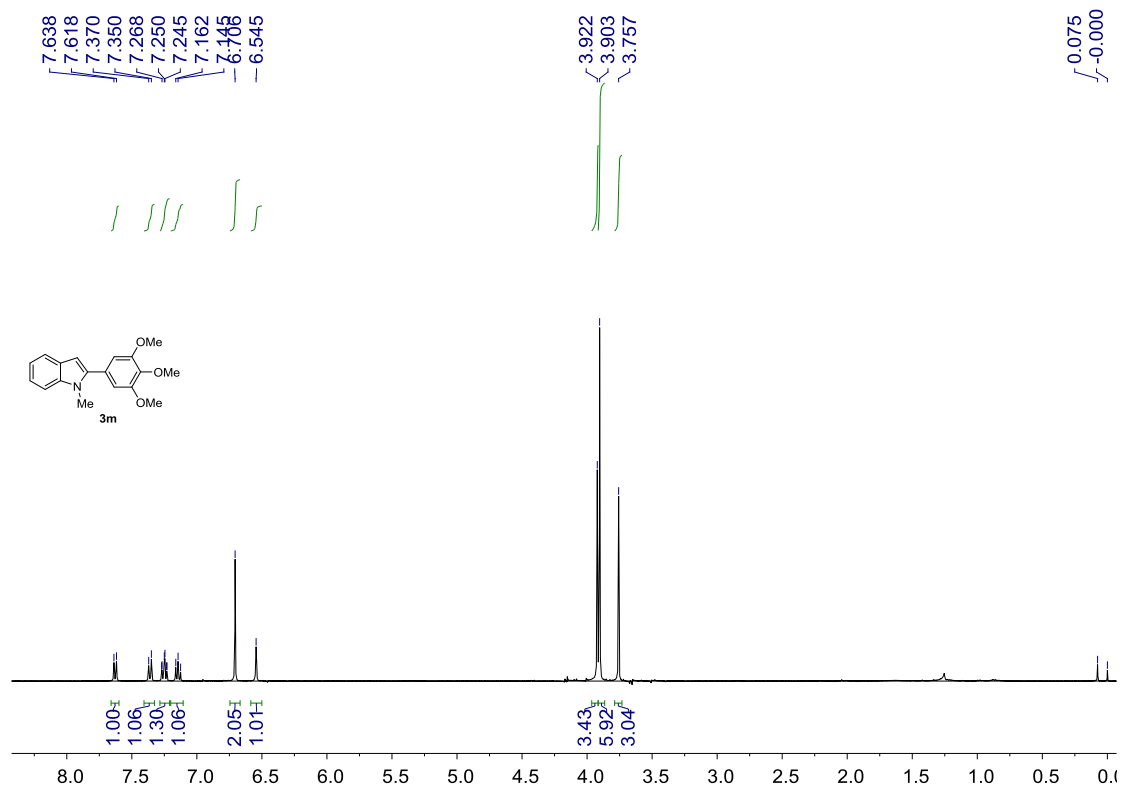

# <sup>13</sup>C NMR

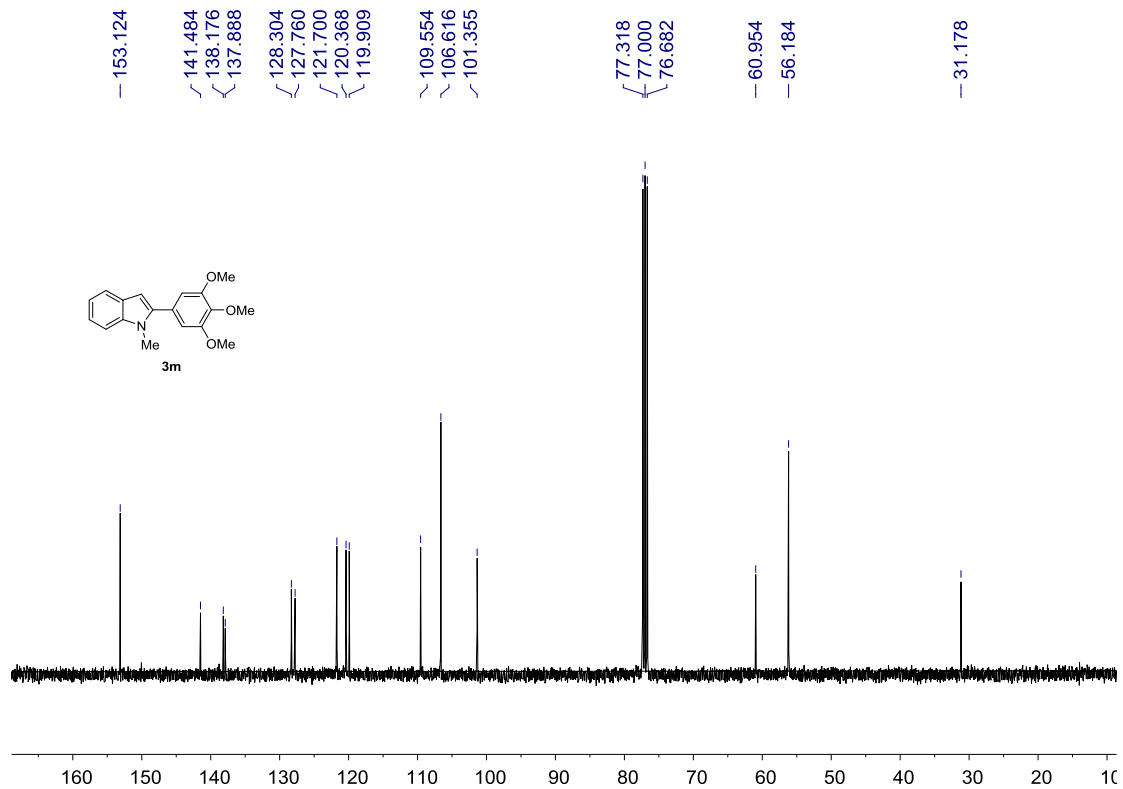

# <sup>1</sup>H NMR

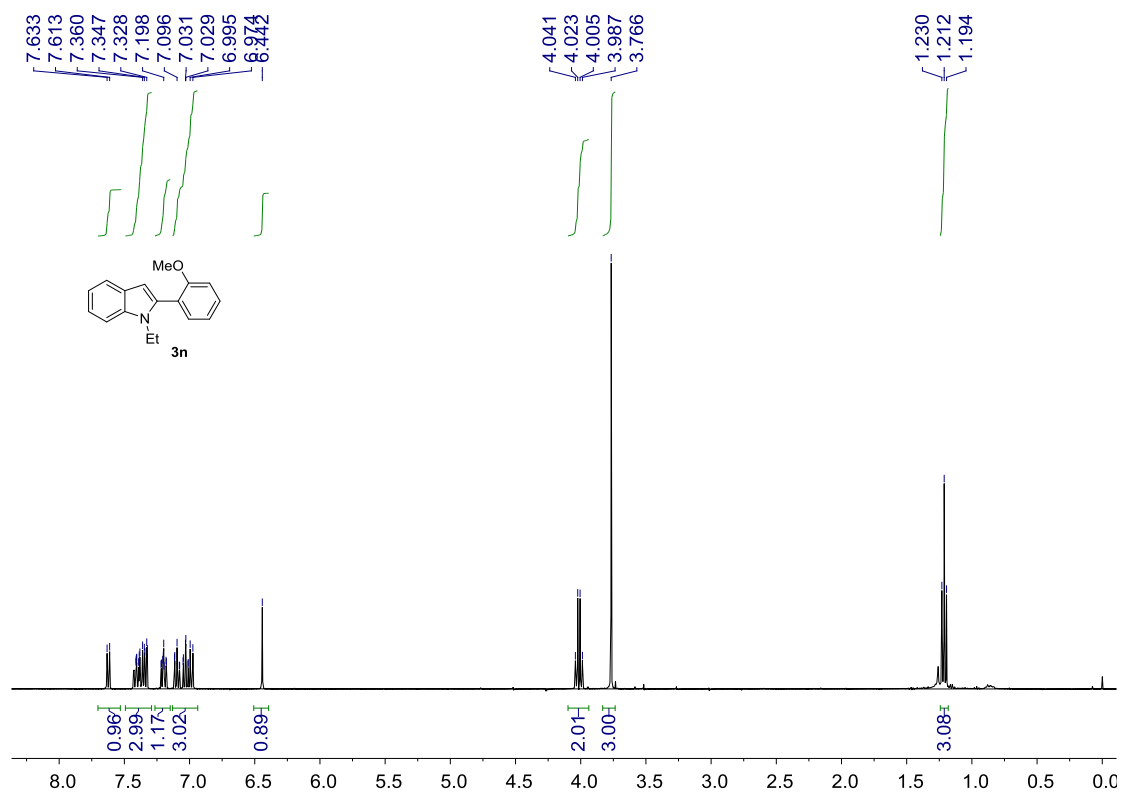

# <sup>13</sup>C NMR

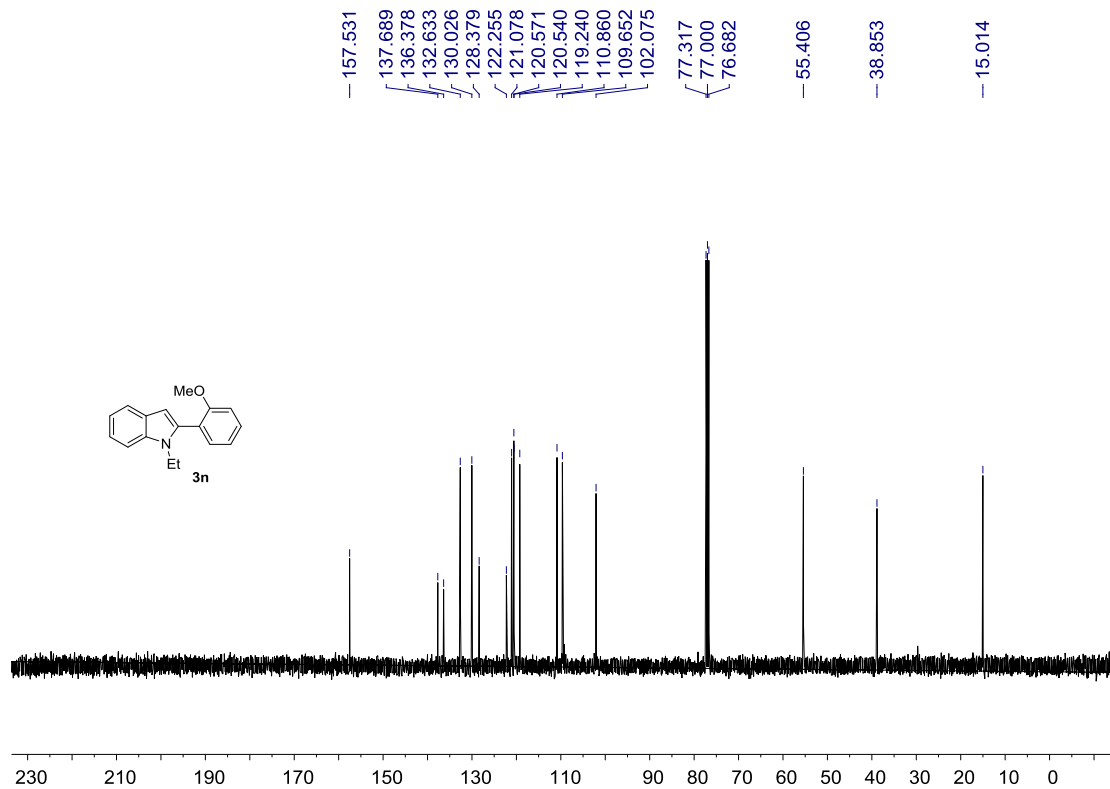

# <sup>1</sup>H NMR

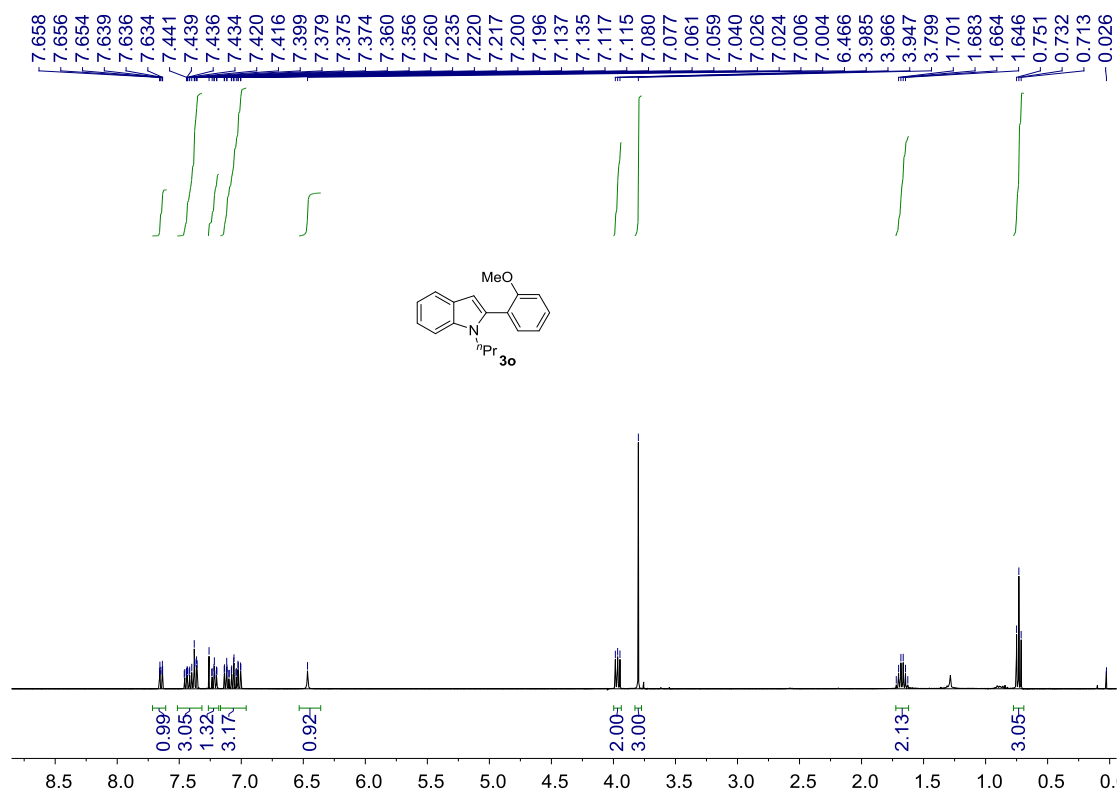

# <sup>13</sup>C NMR

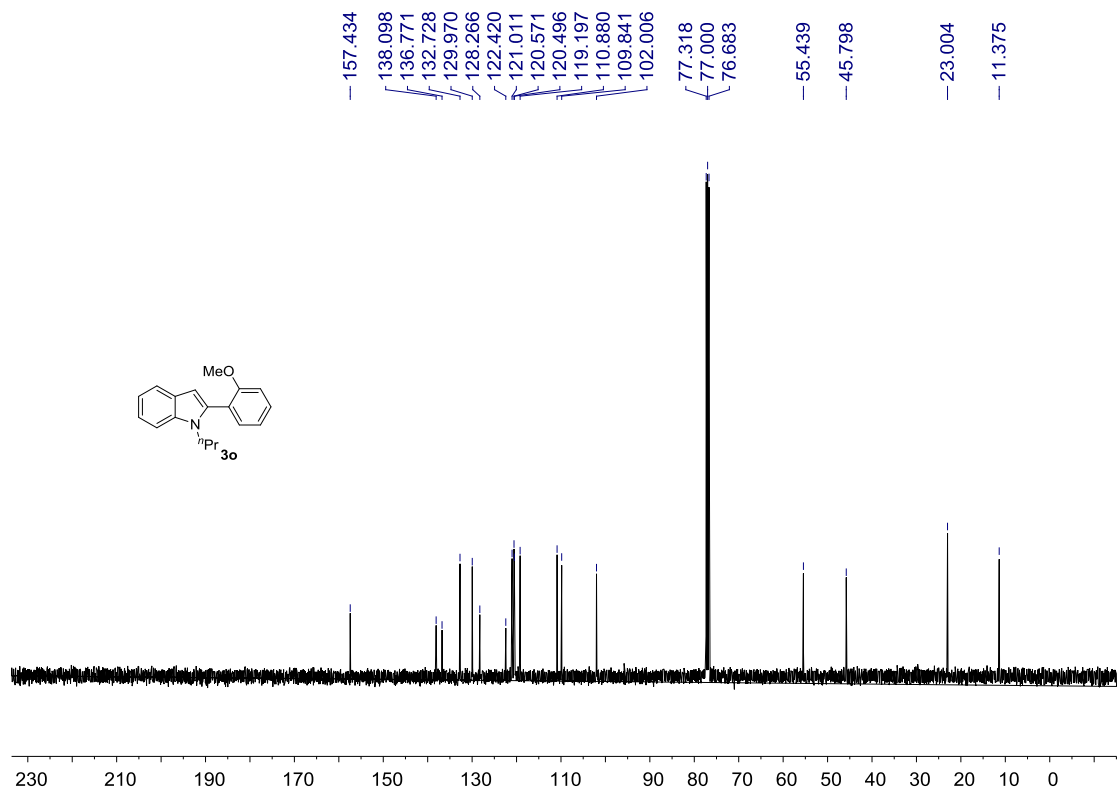

# <sup>1</sup>H NMR

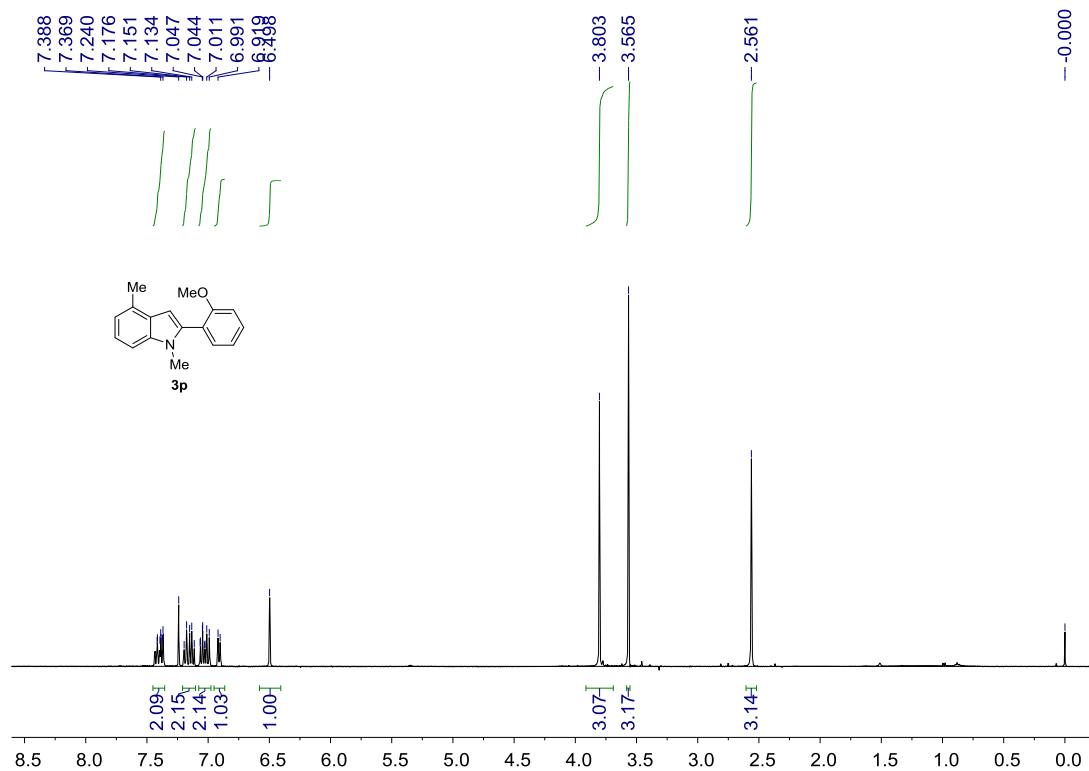

# <sup>13</sup>C NMR

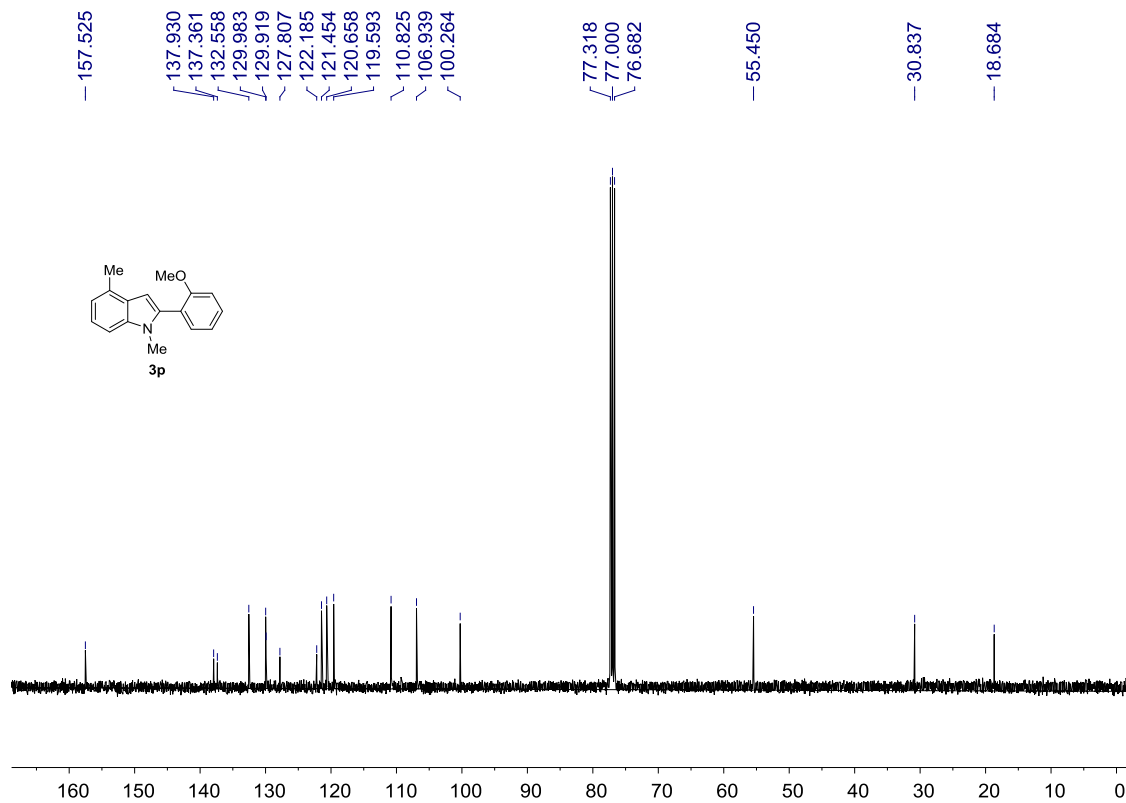



# <sup>1</sup>H NMR

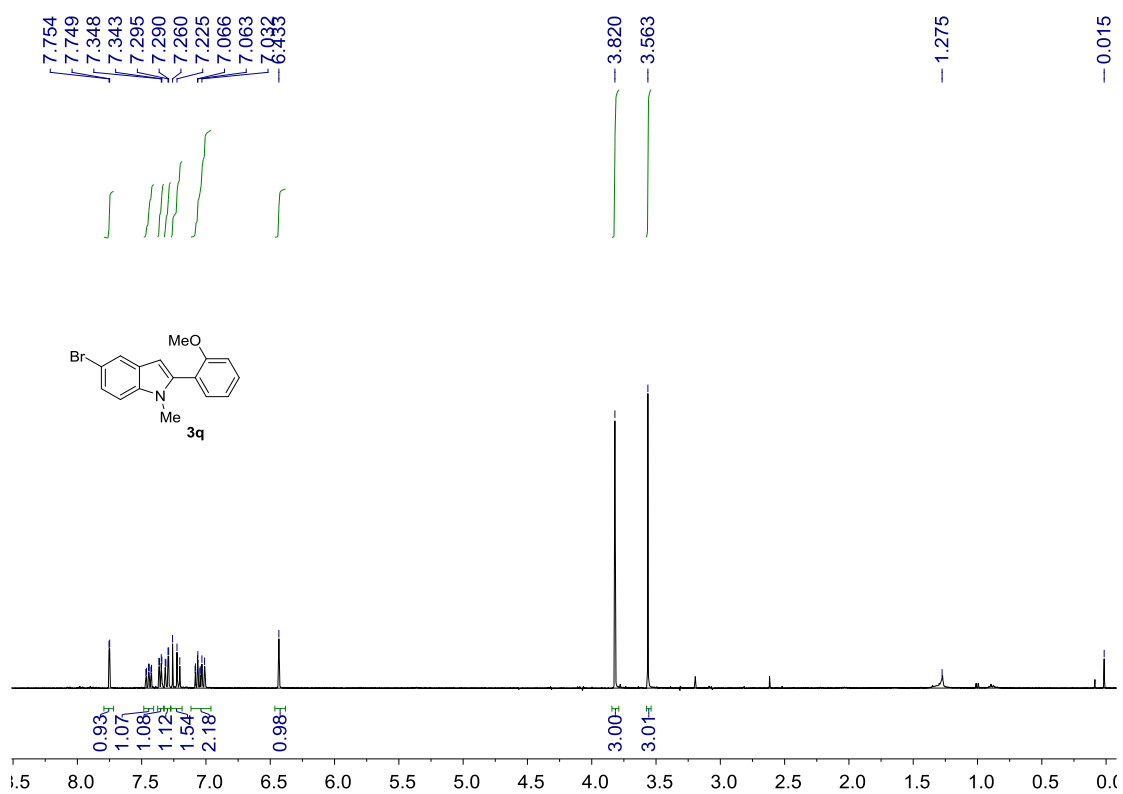

# <sup>13</sup>C NMR

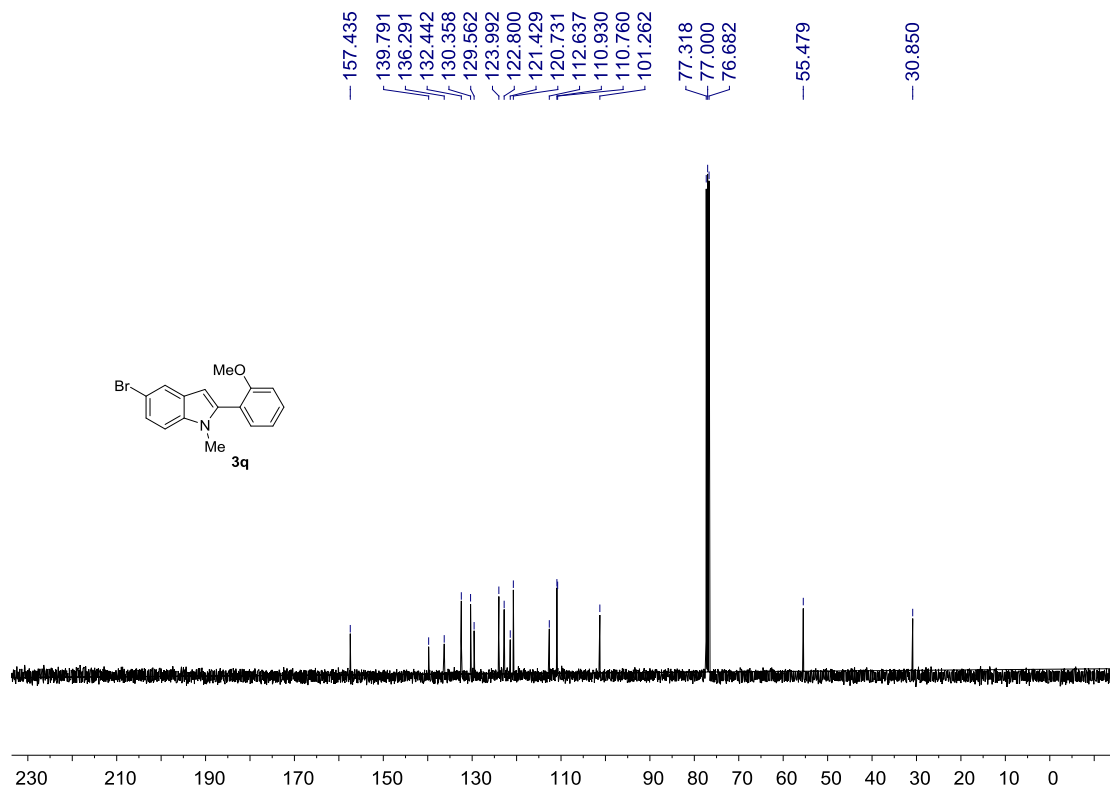

# <sup>1</sup>H NMR

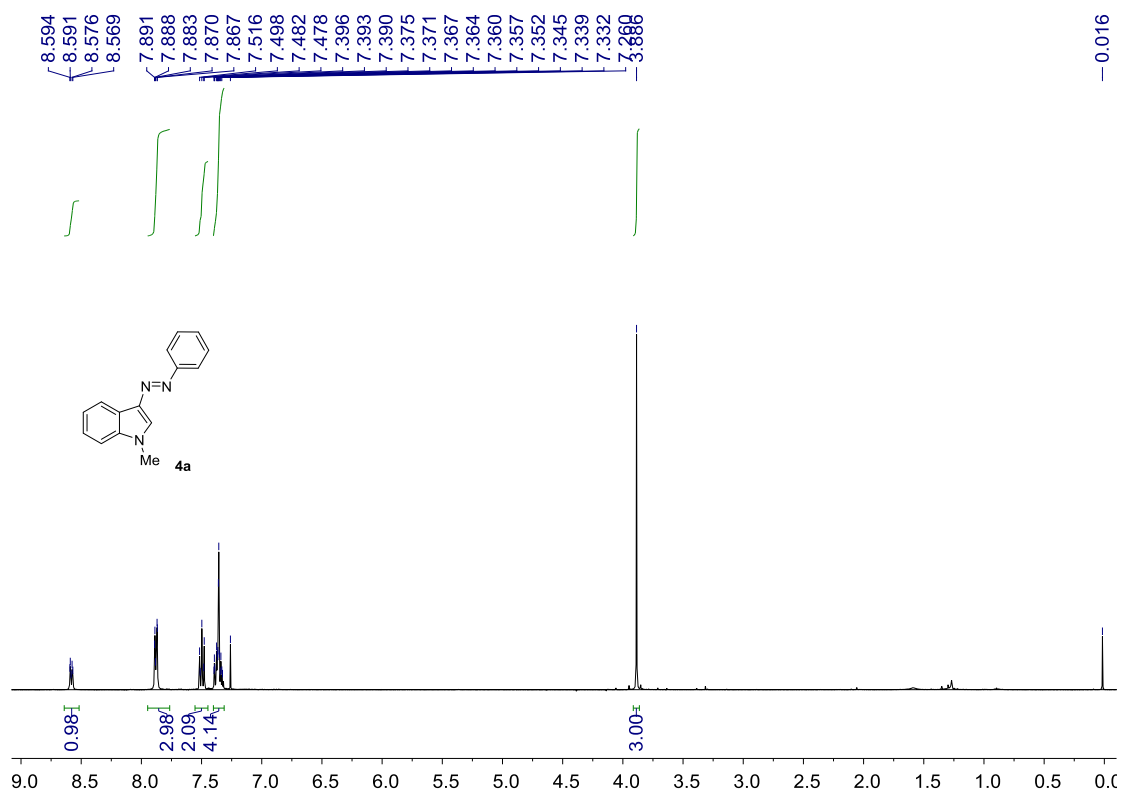

# <sup>13</sup>C NMR

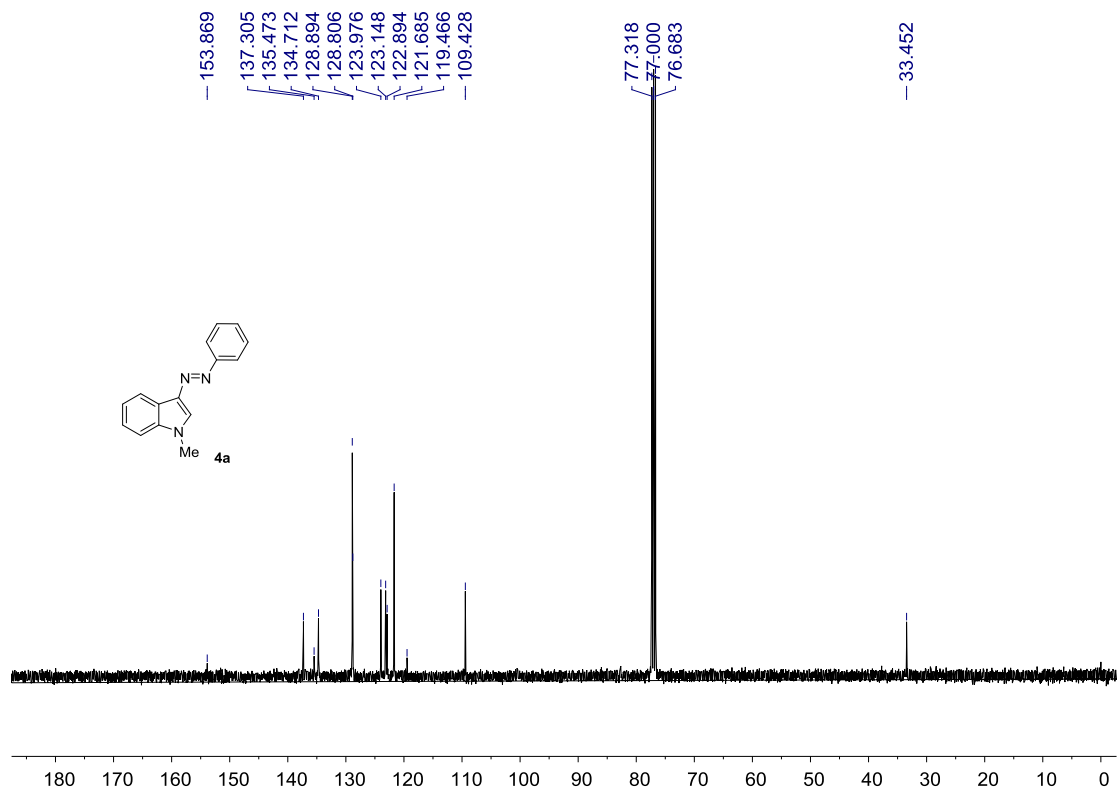

# <sup>1</sup>H NMR

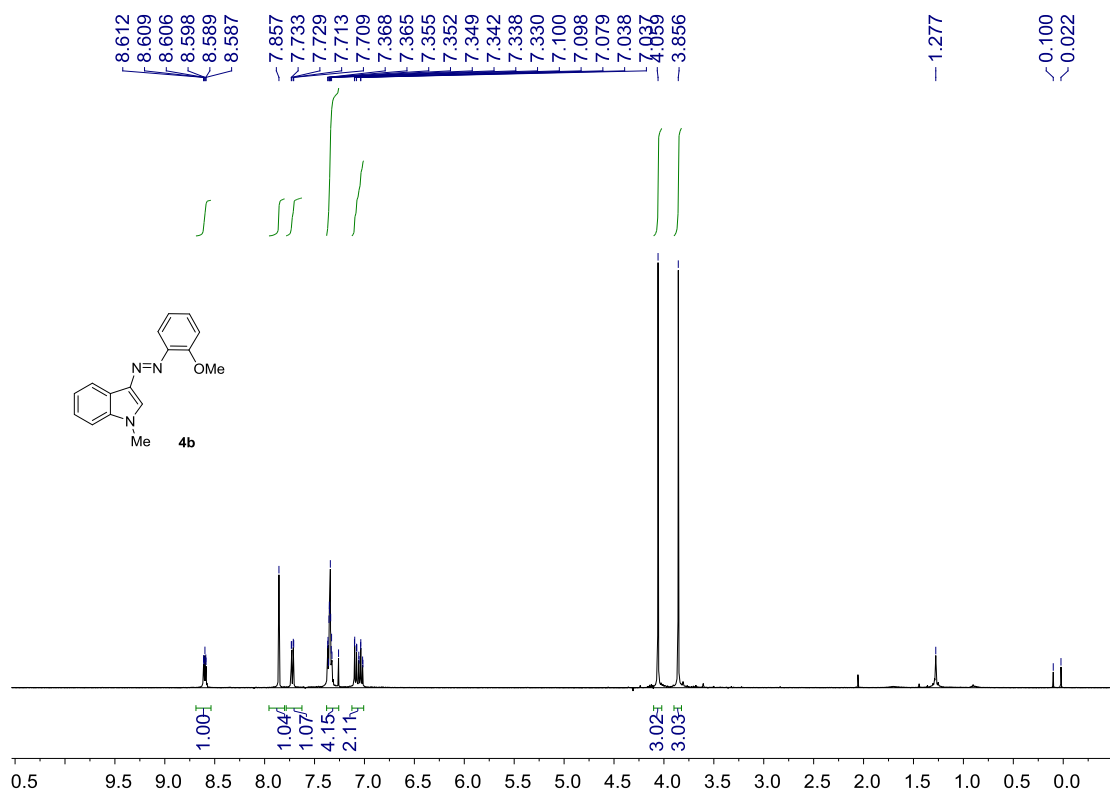

# <sup>13</sup>C NMR

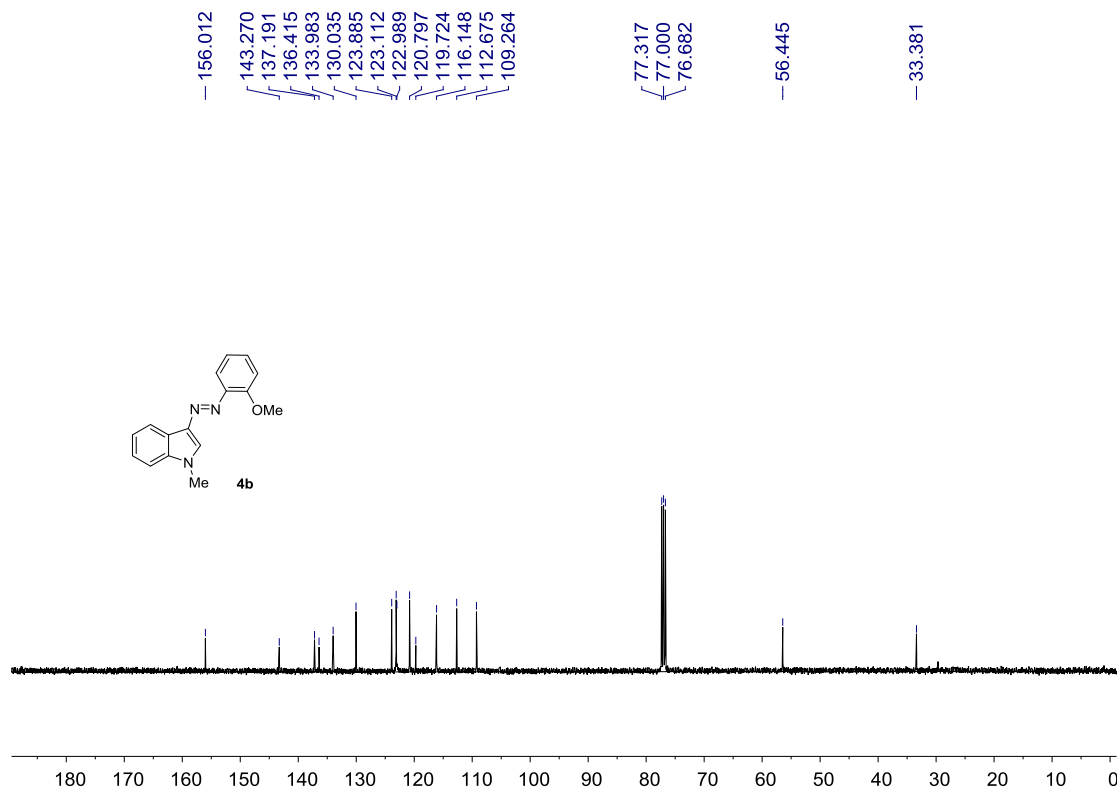

# <sup>1</sup>H NMR

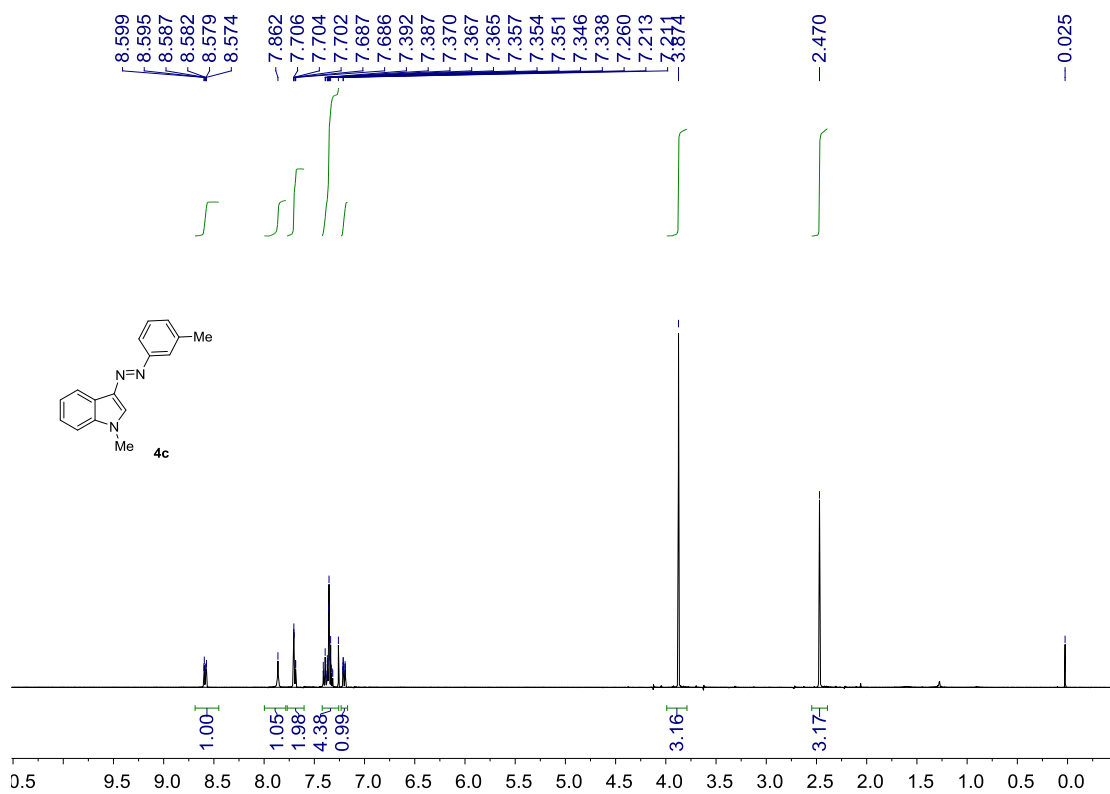

# <sup>13</sup>C NMR

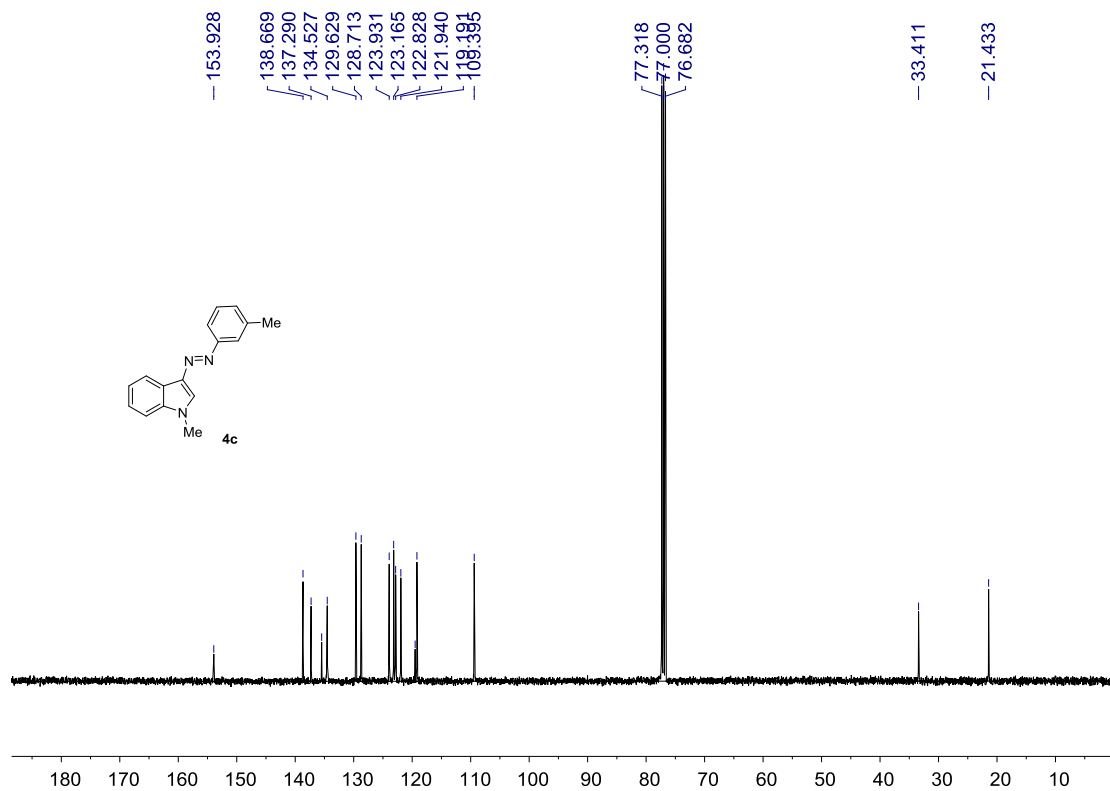

# <sup>1</sup>H NMR

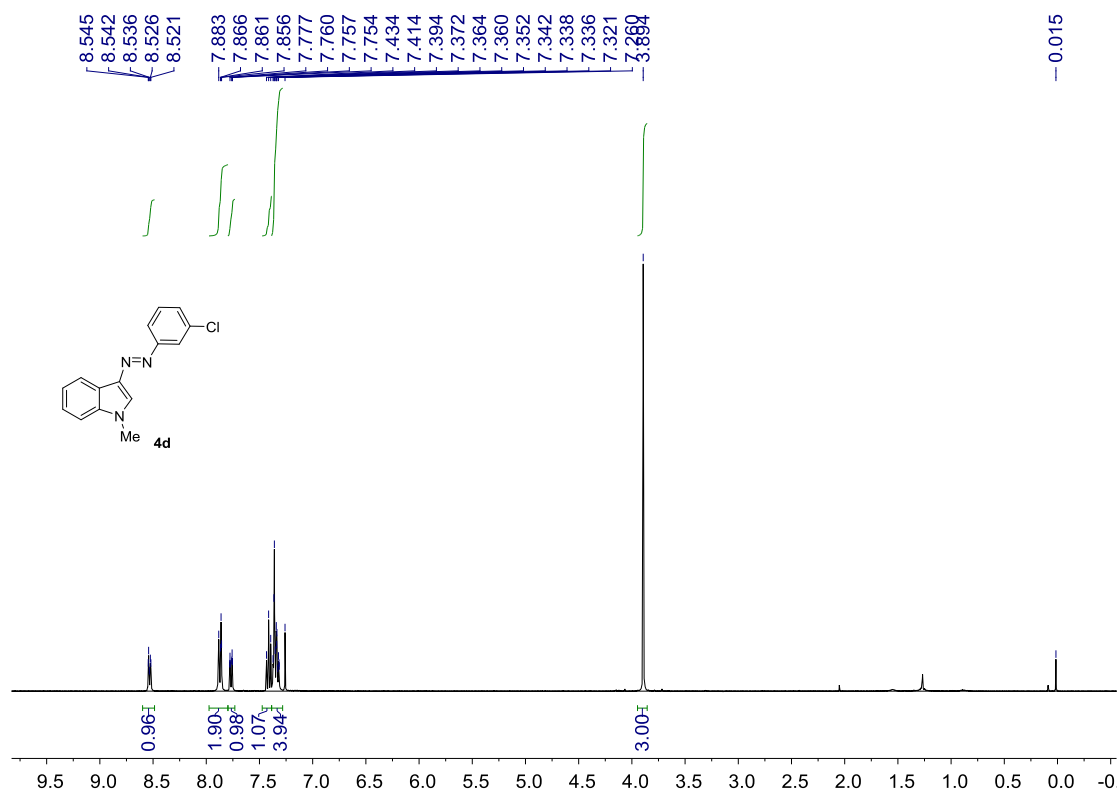

# <sup>13</sup>C NMR

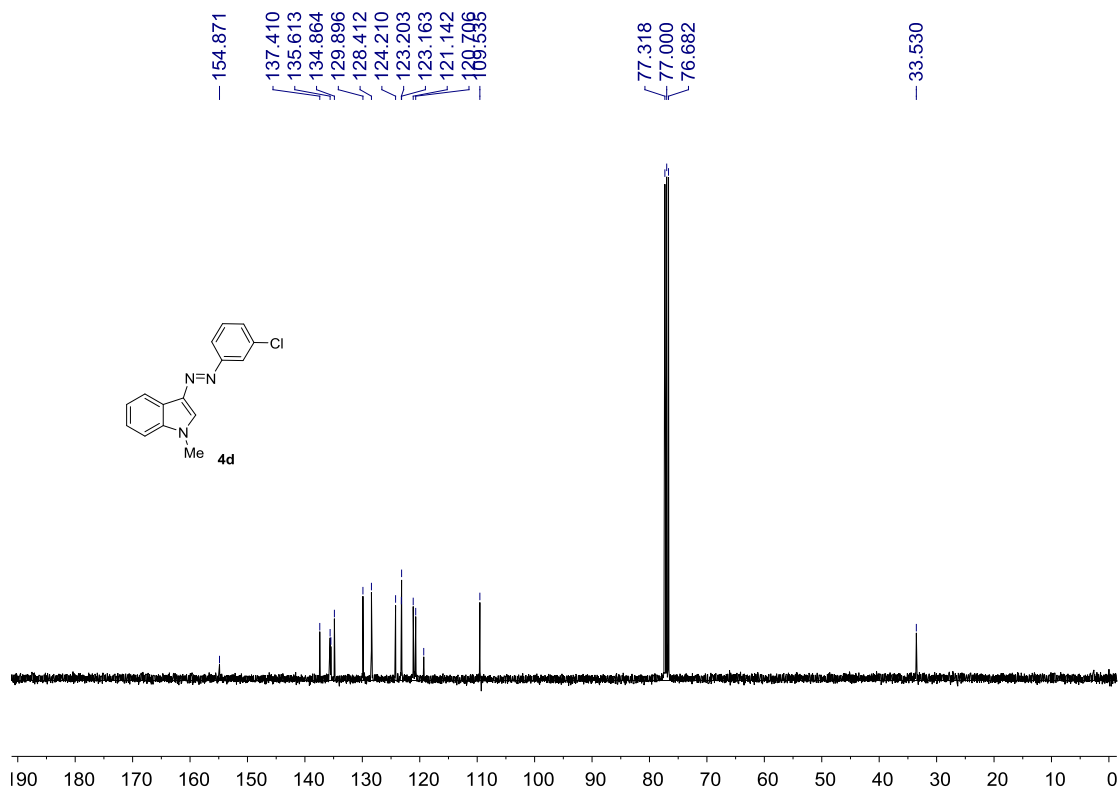

# <sup>1</sup>H NMR

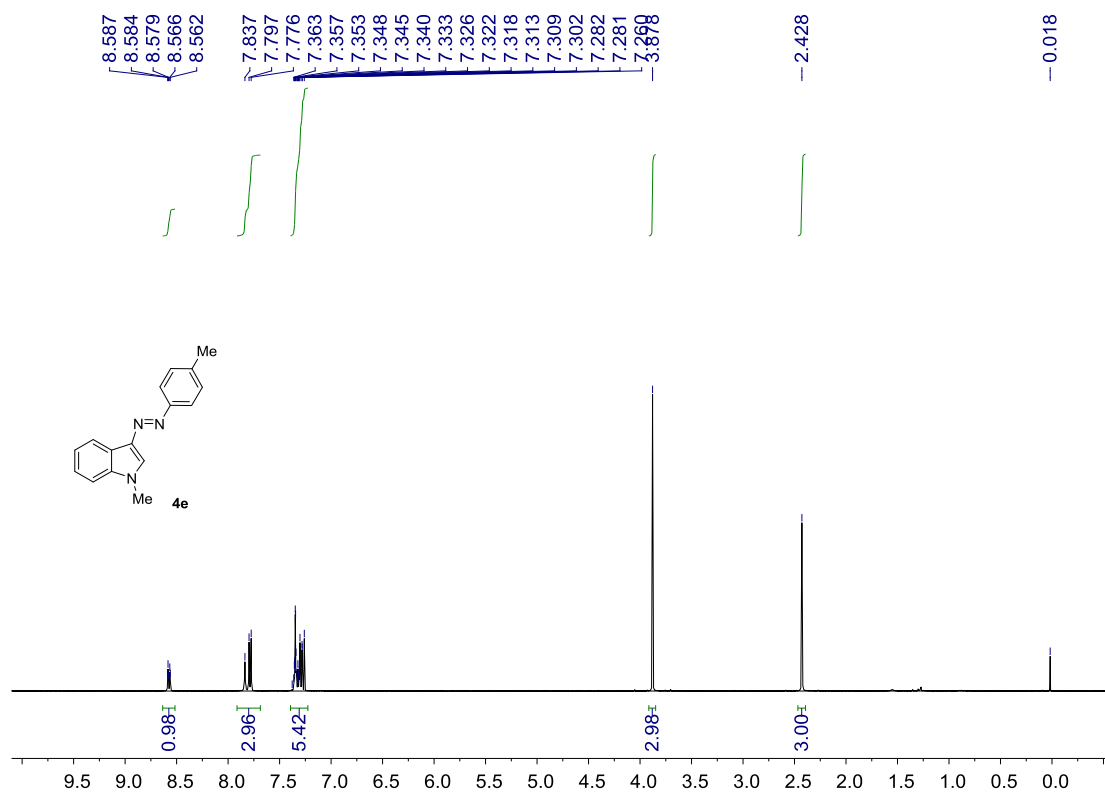

# <sup>13</sup>C NMR

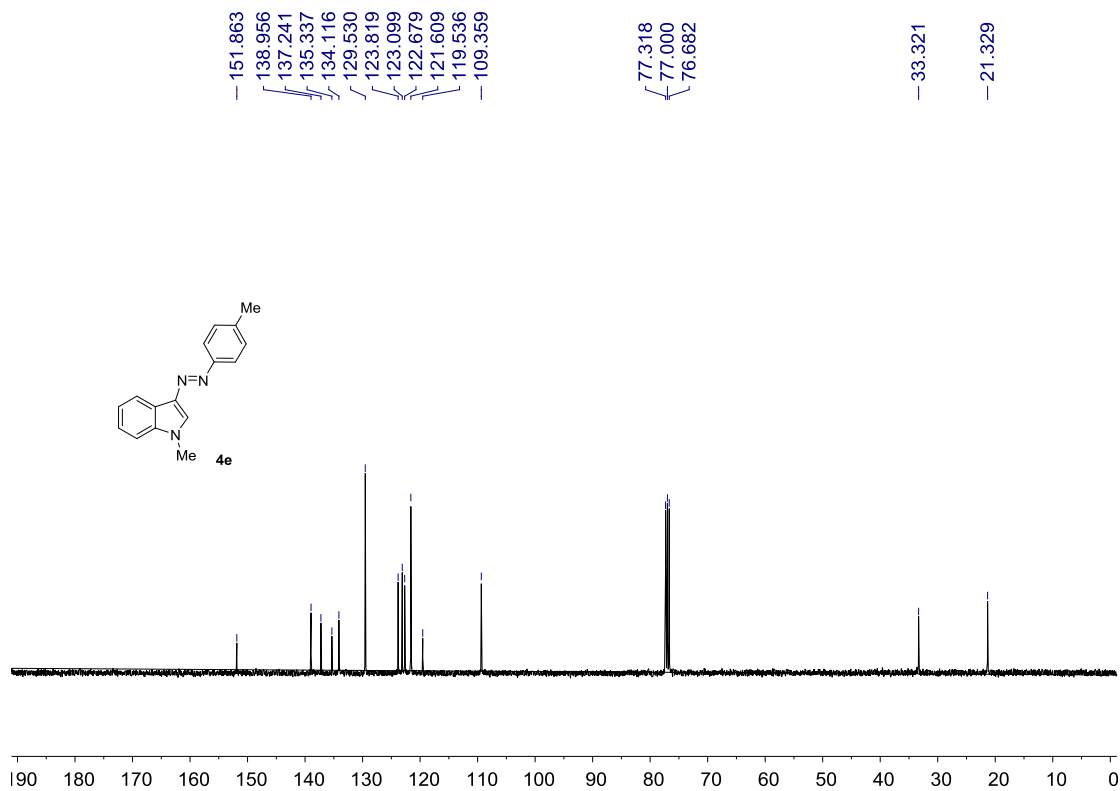

# <sup>1</sup>H NMR

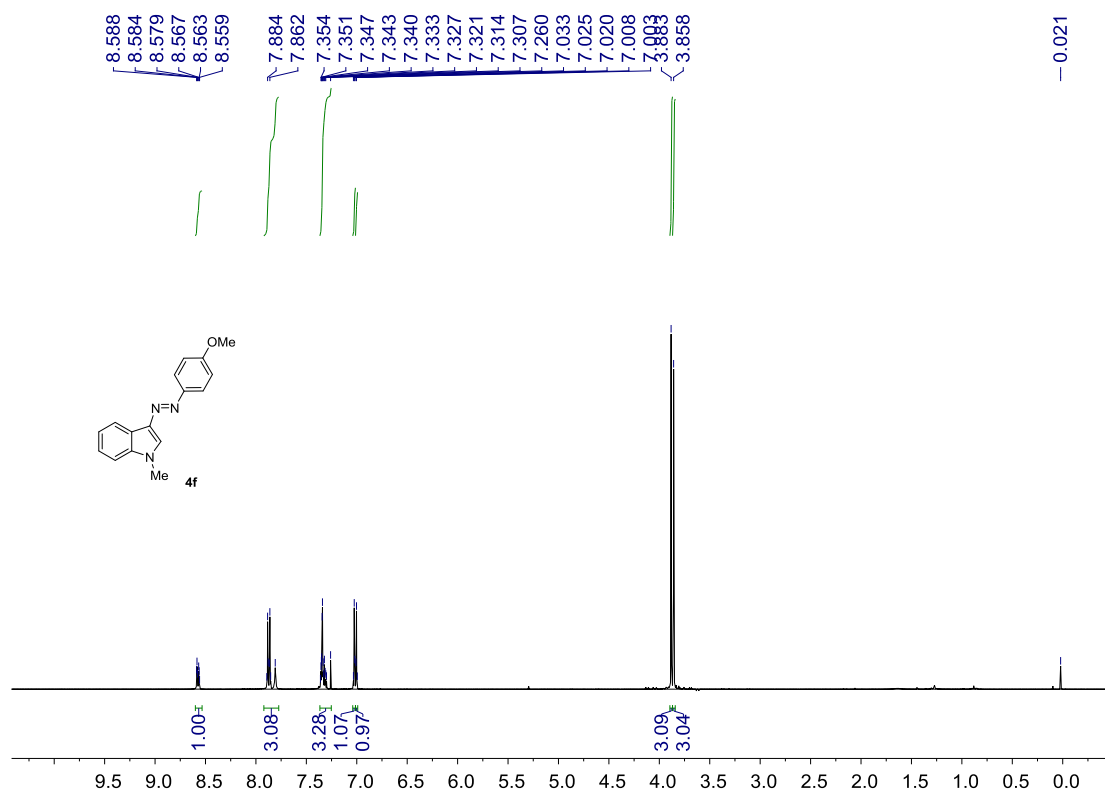

# <sup>13</sup>C NMR

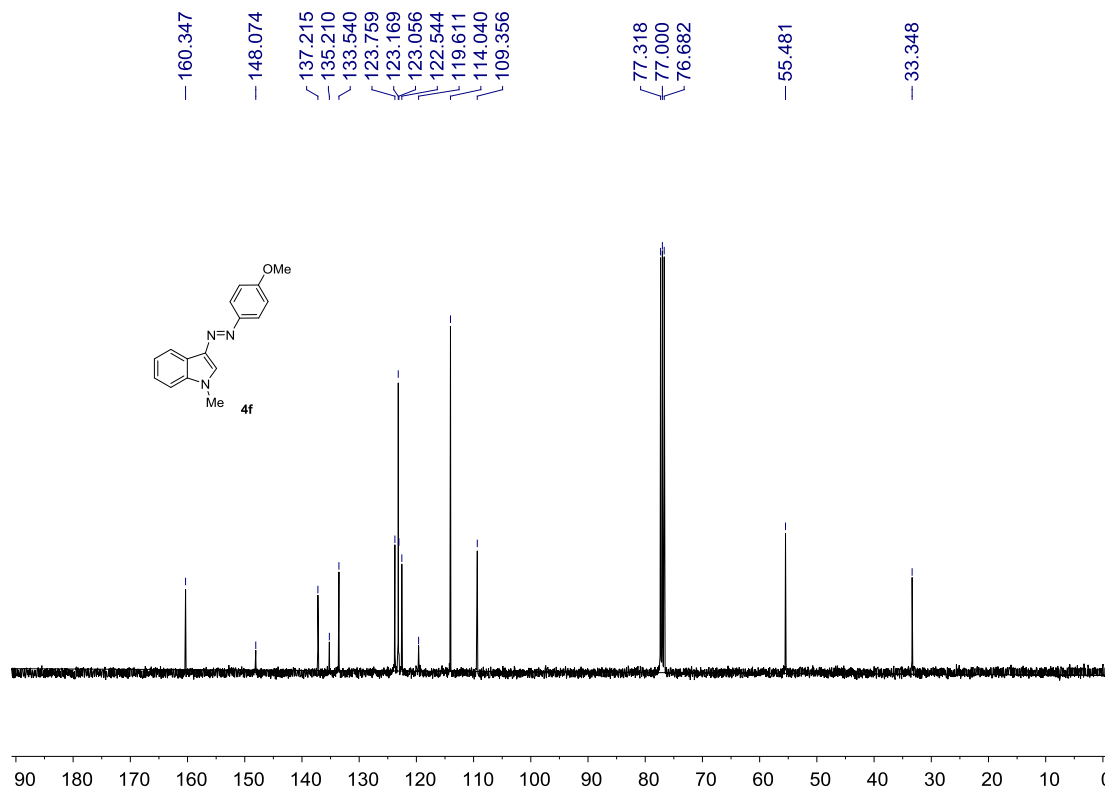

# <sup>1</sup>H NMR

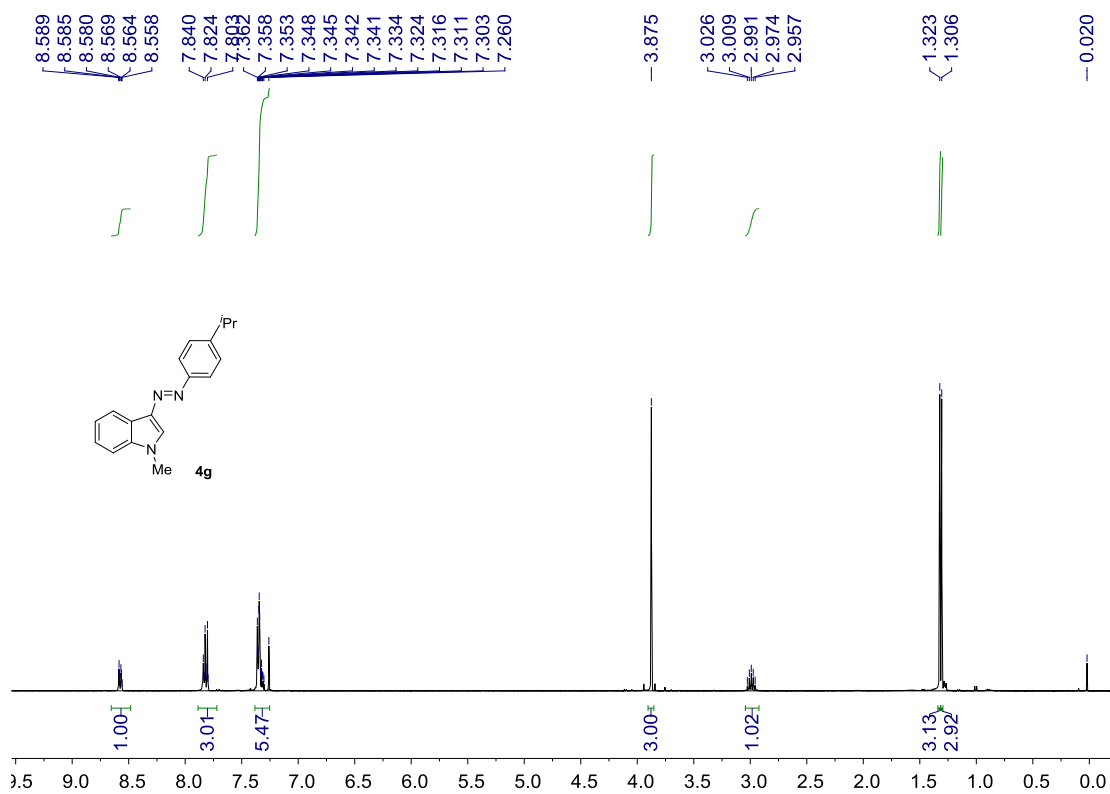

# <sup>13</sup>C NMR

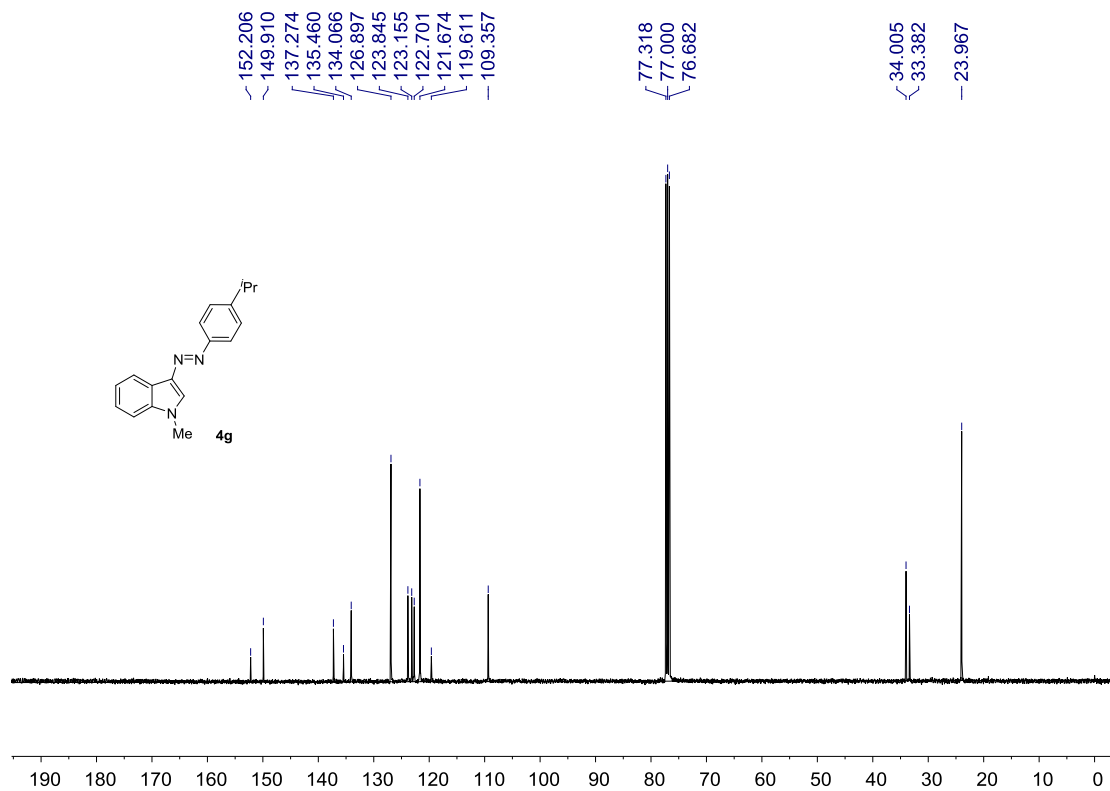



# <sup>1</sup>H NMR

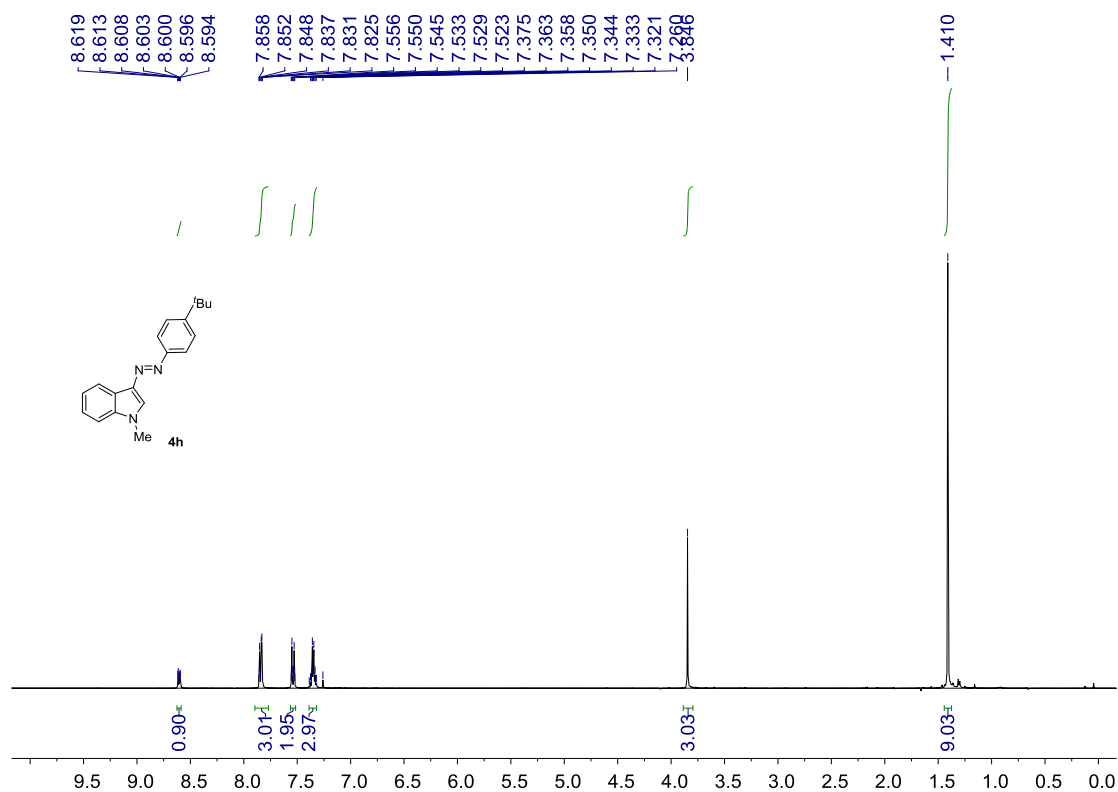

# <sup>13</sup>C NMR

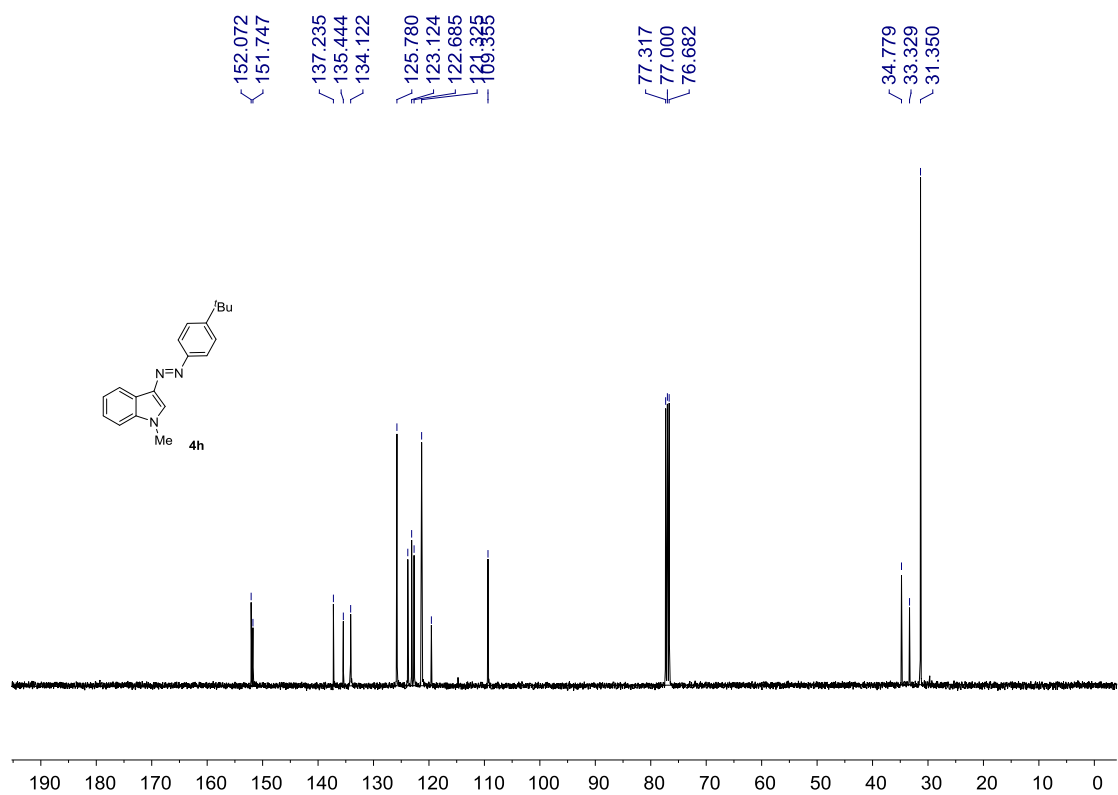

# <sup>1</sup>H NMR

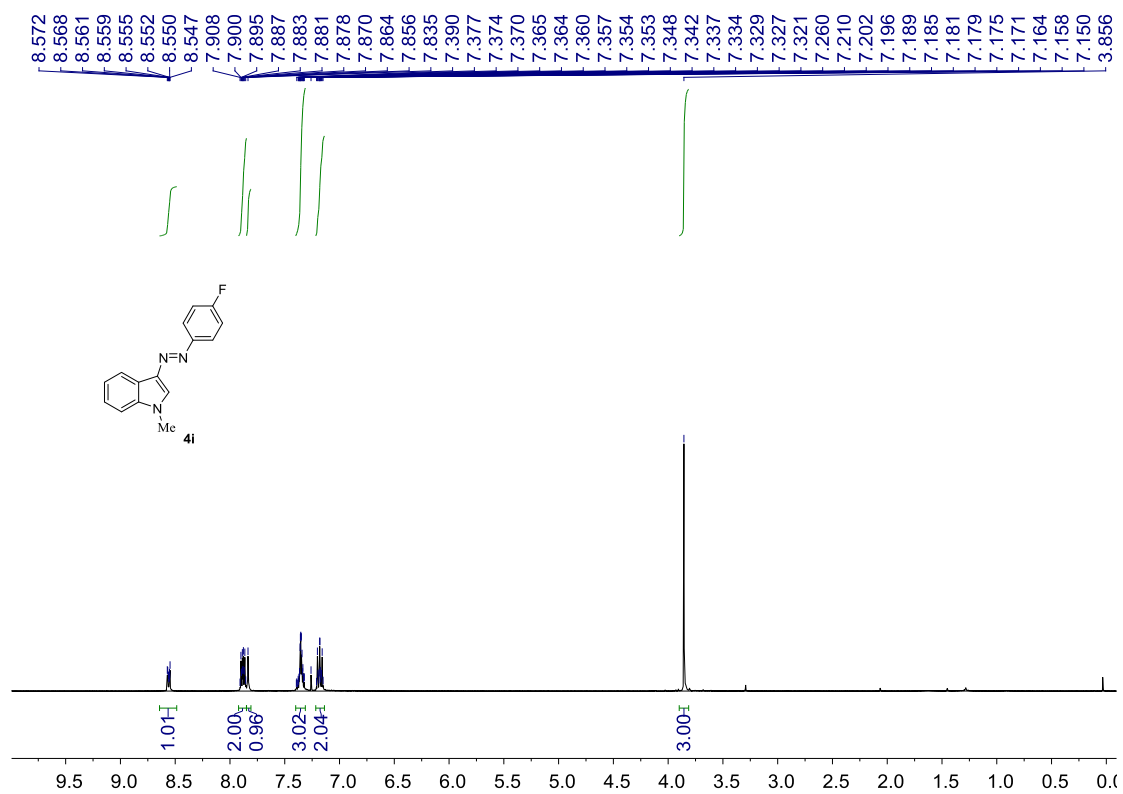

# <sup>13</sup>C NMR

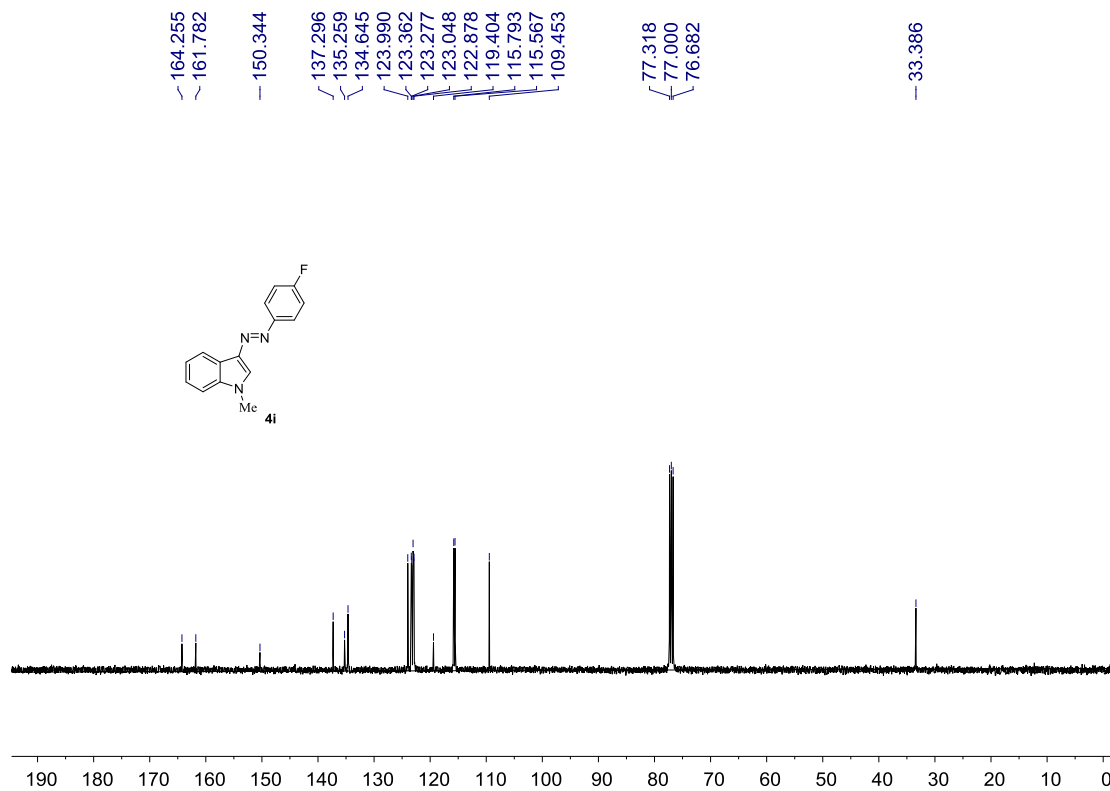

# <sup>1</sup>H NMR

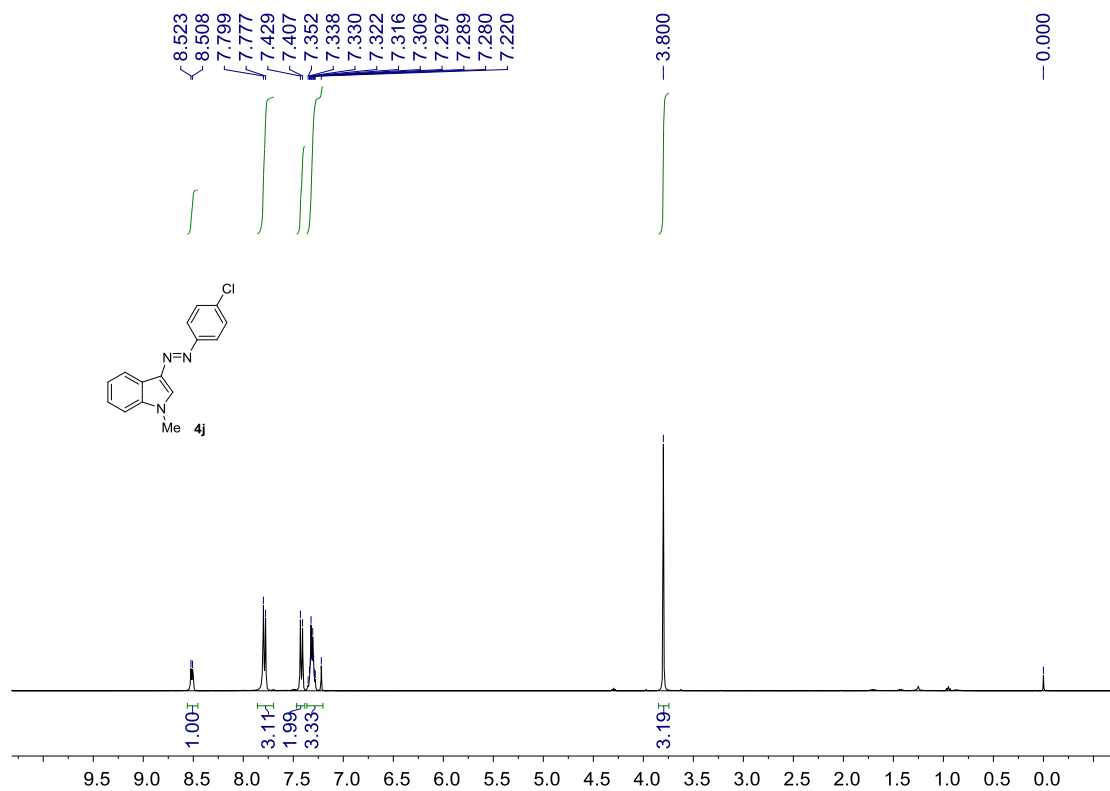

# <sup>13</sup>C NMR

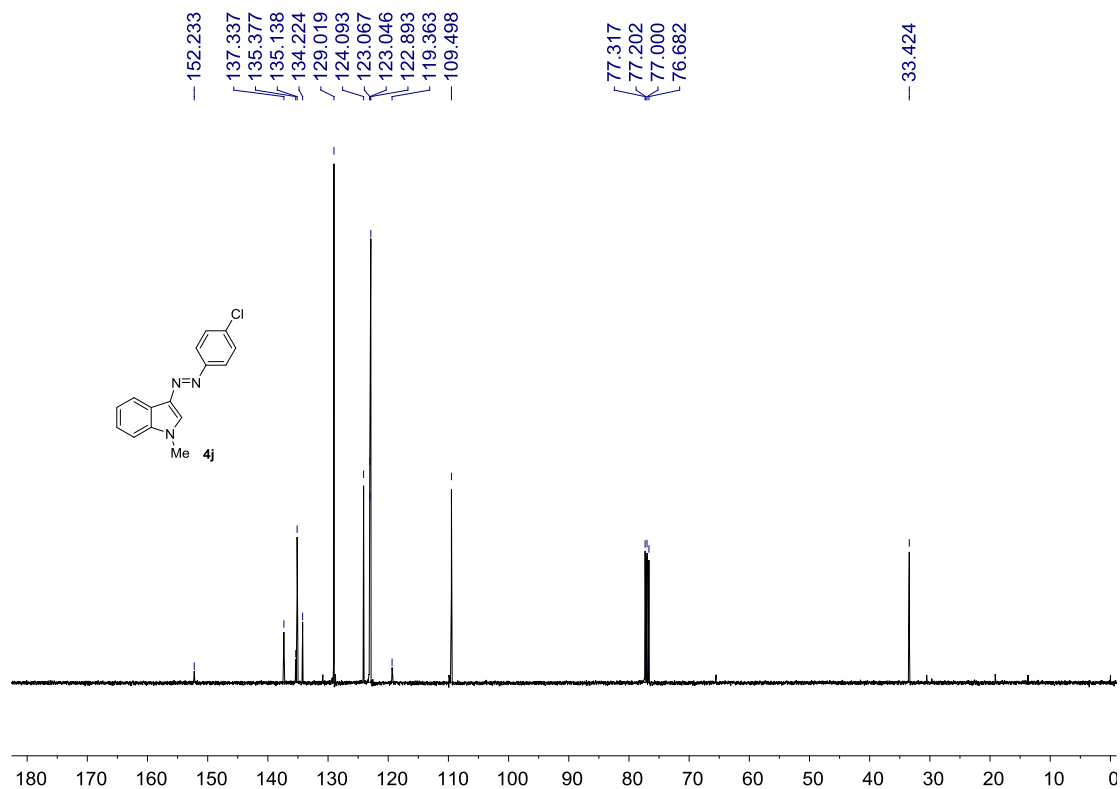

# <sup>1</sup>H NMR

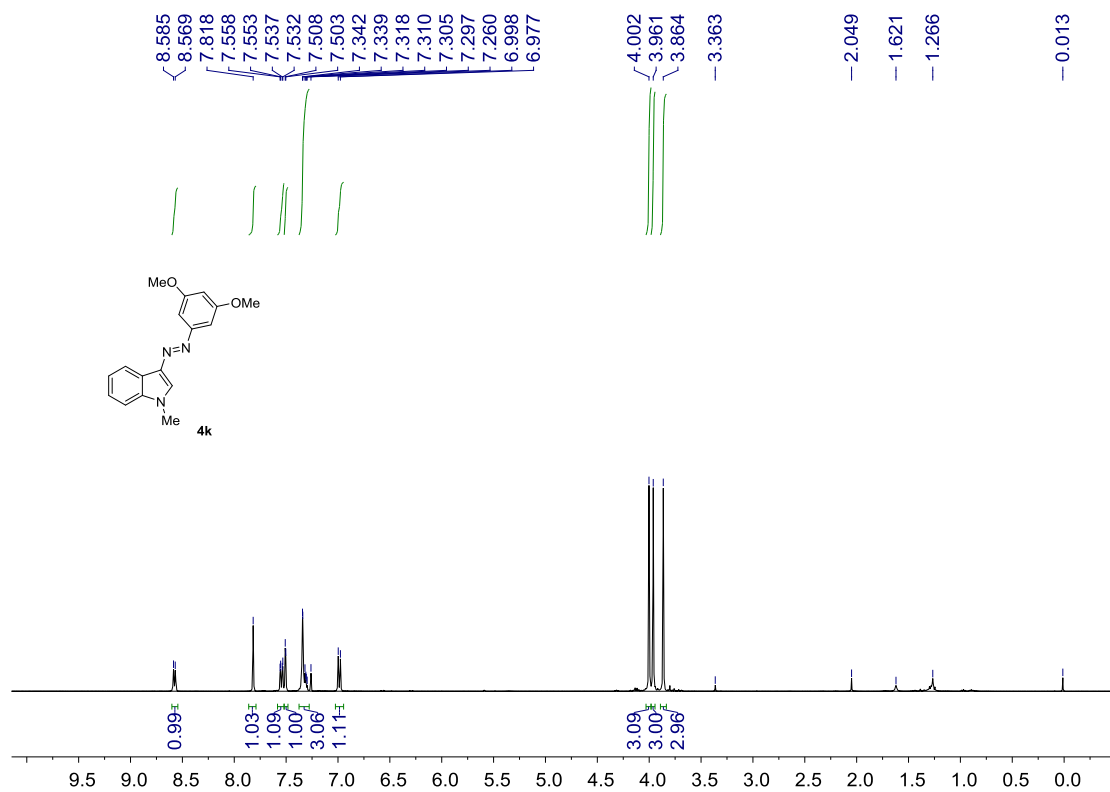

# <sup>13</sup>C NMR

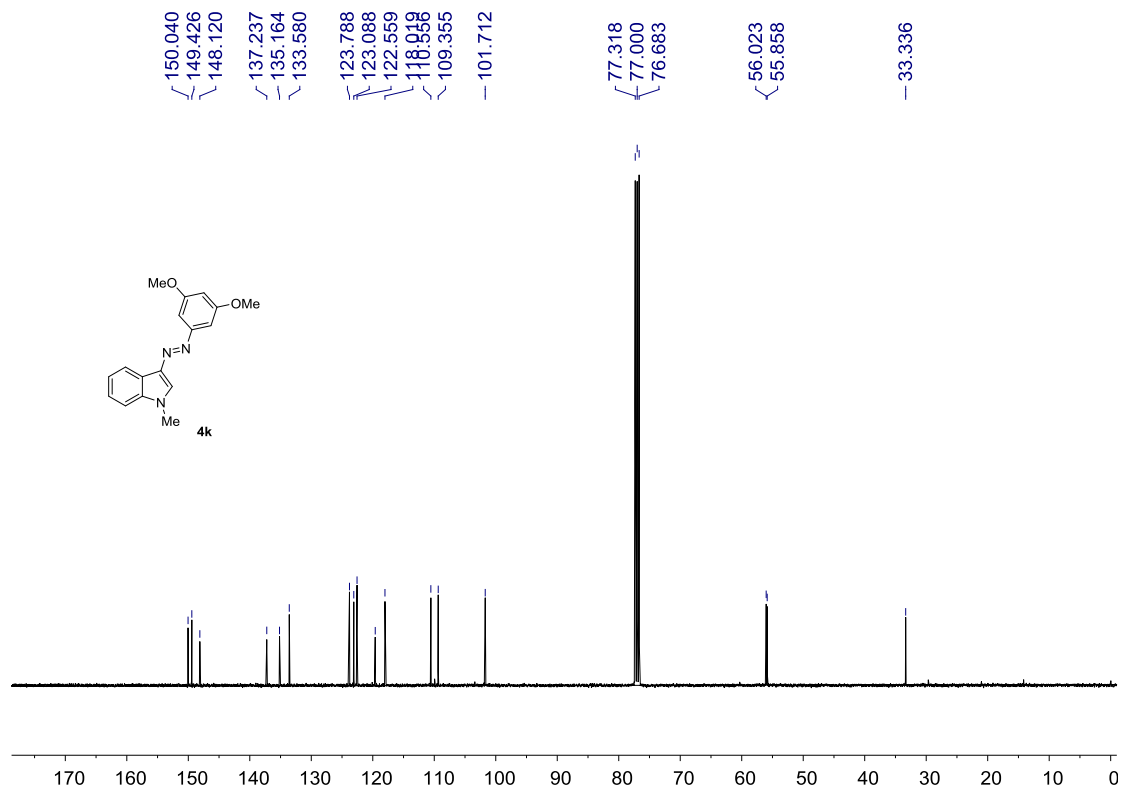

# <sup>1</sup>H NMR

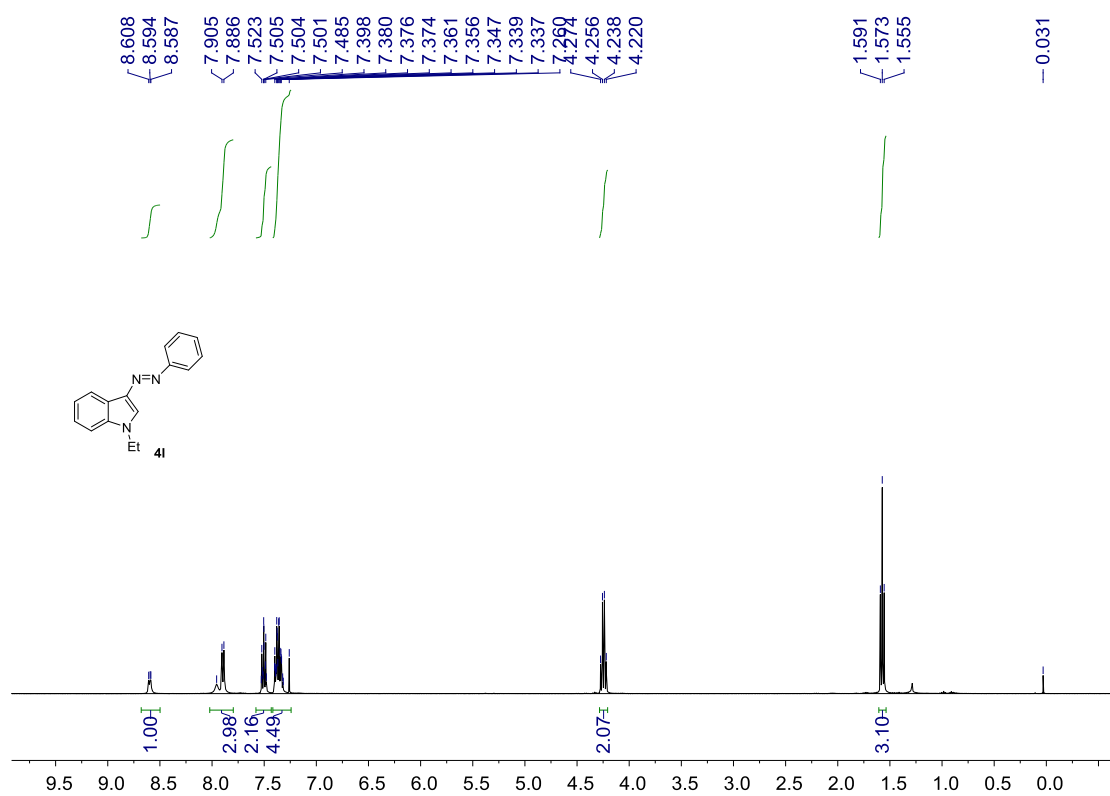

# <sup>13</sup>C NMR

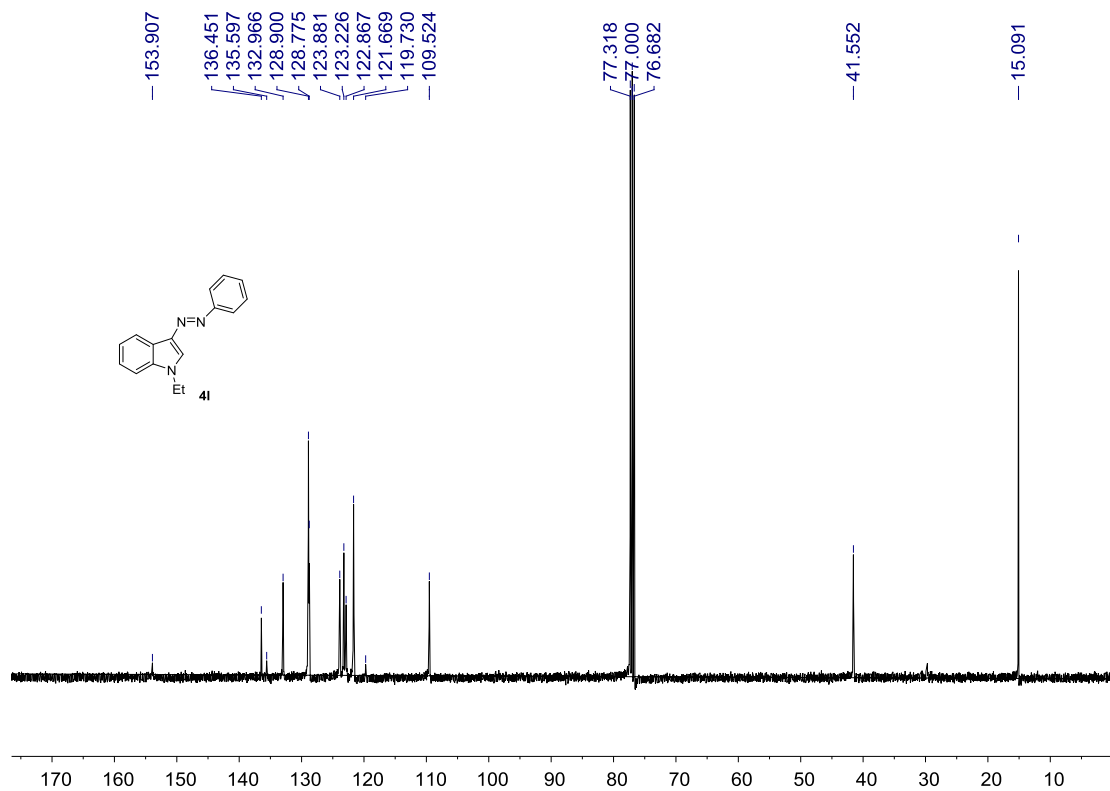

# <sup>1</sup>H NMR

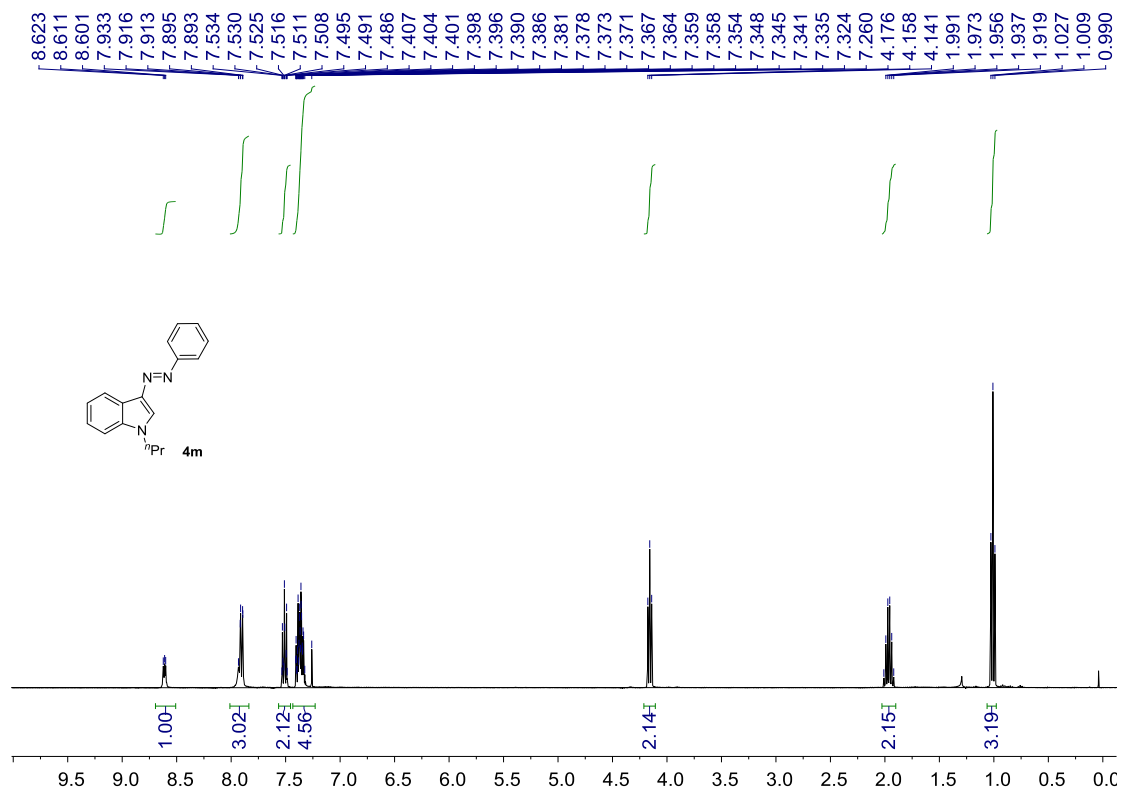

# <sup>13</sup>C NMR

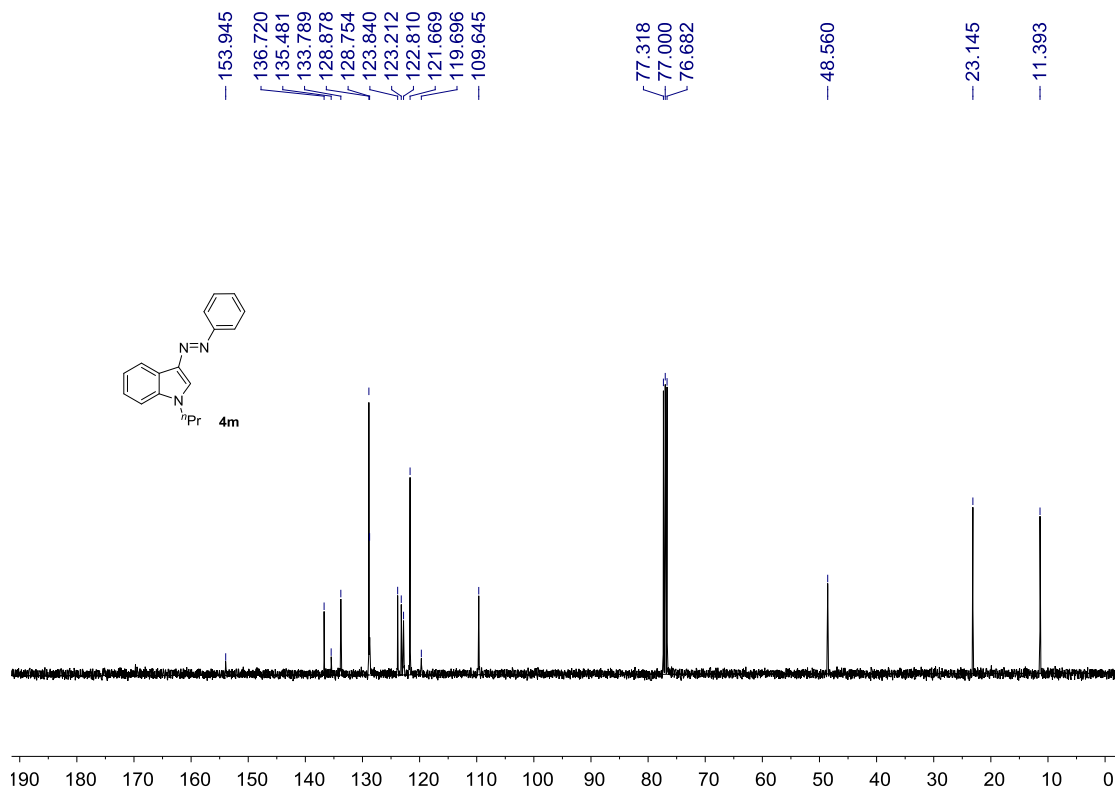

# <sup>1</sup>H NMR

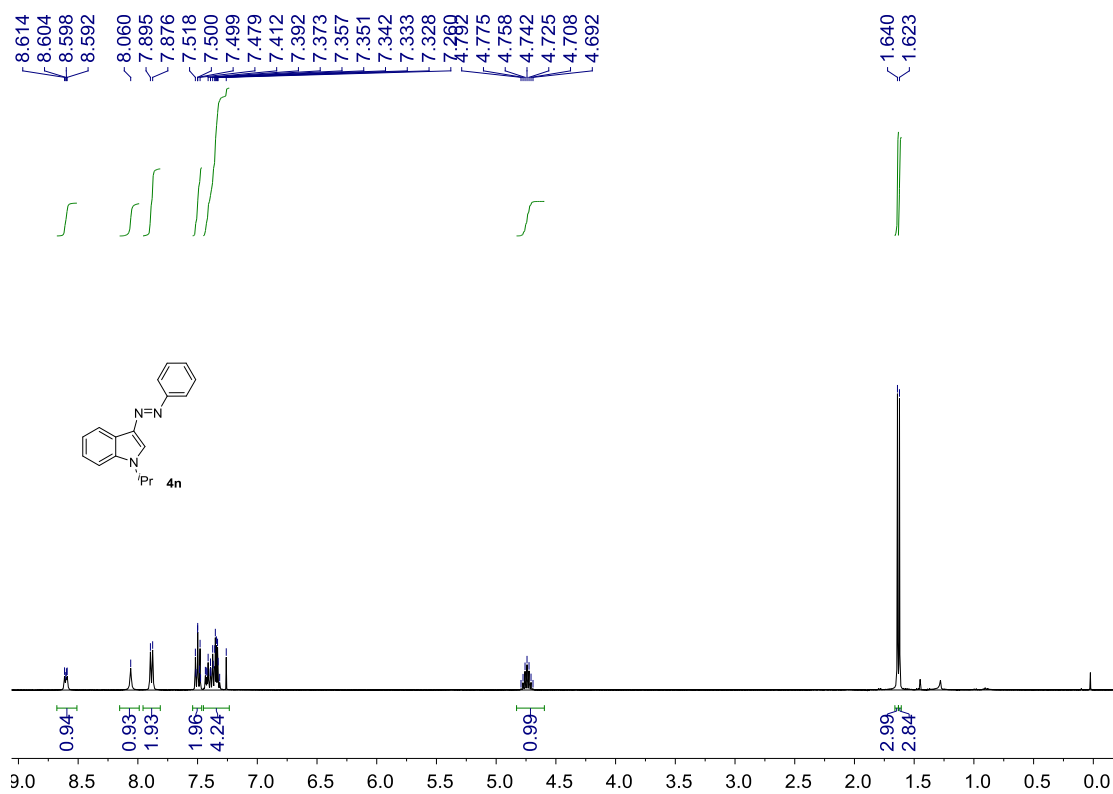

# <sup>13</sup>C NMR

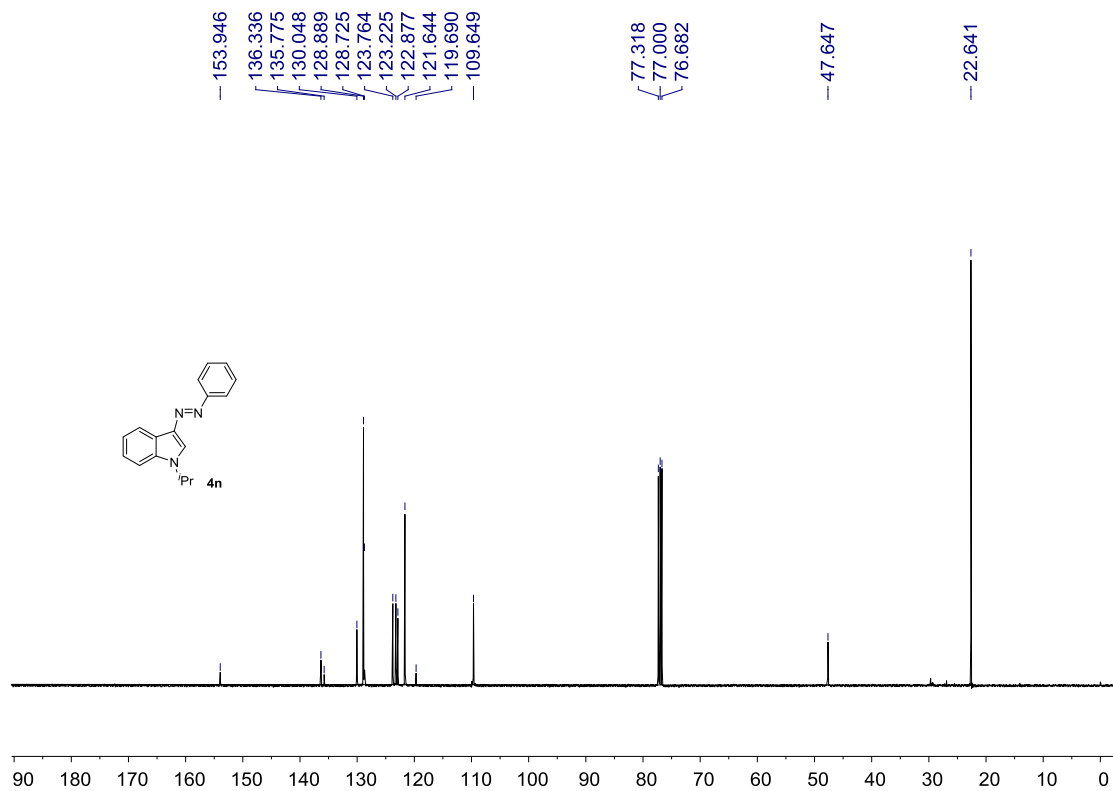

# <sup>1</sup>H NMR

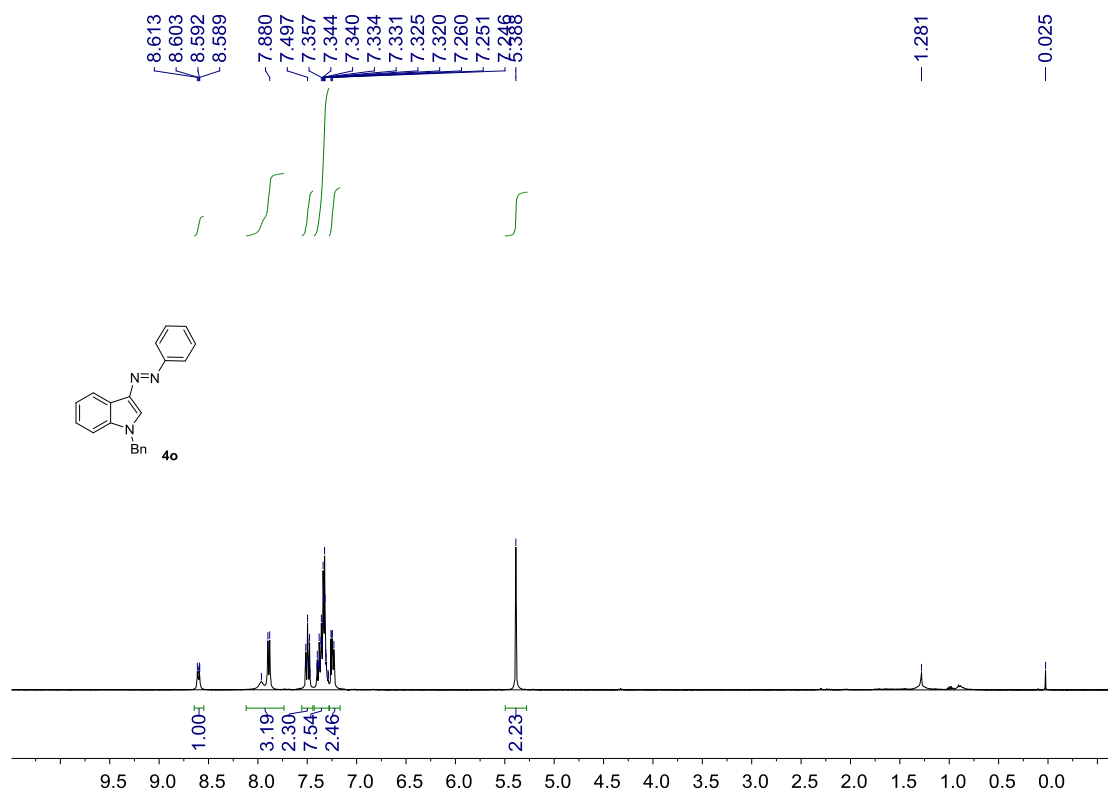

# <sup>13</sup>C NMR

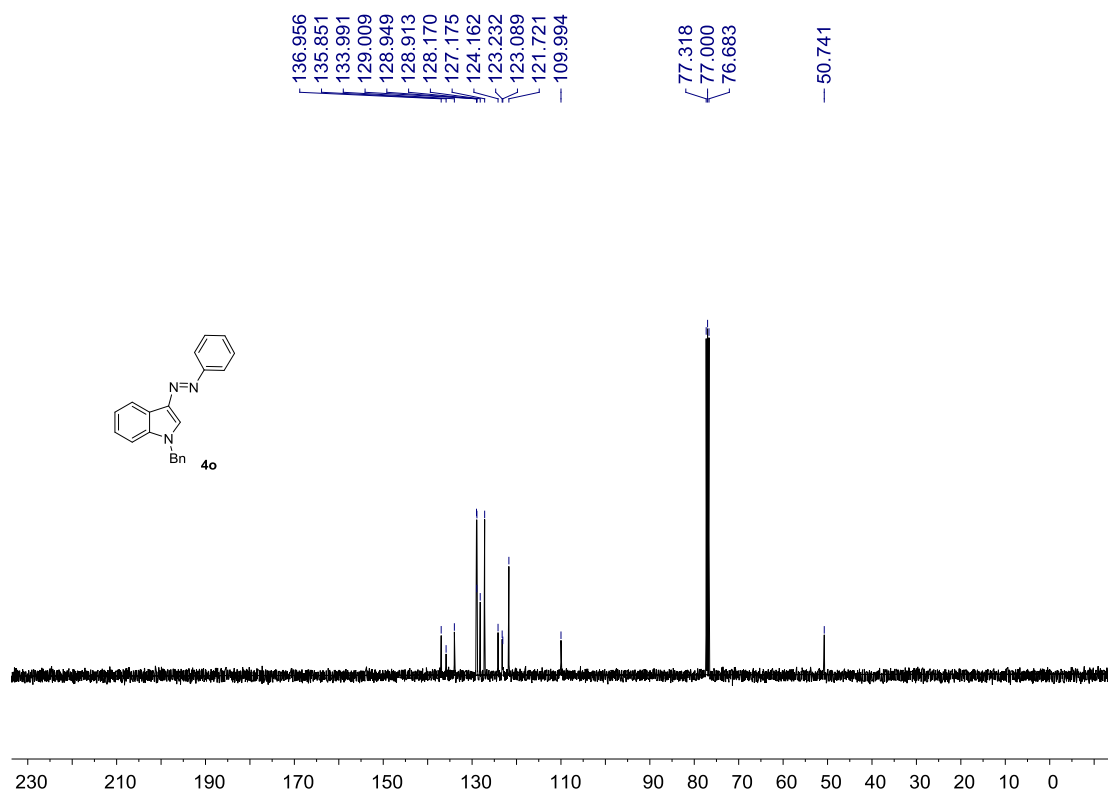



# <sup>1</sup>H NMR

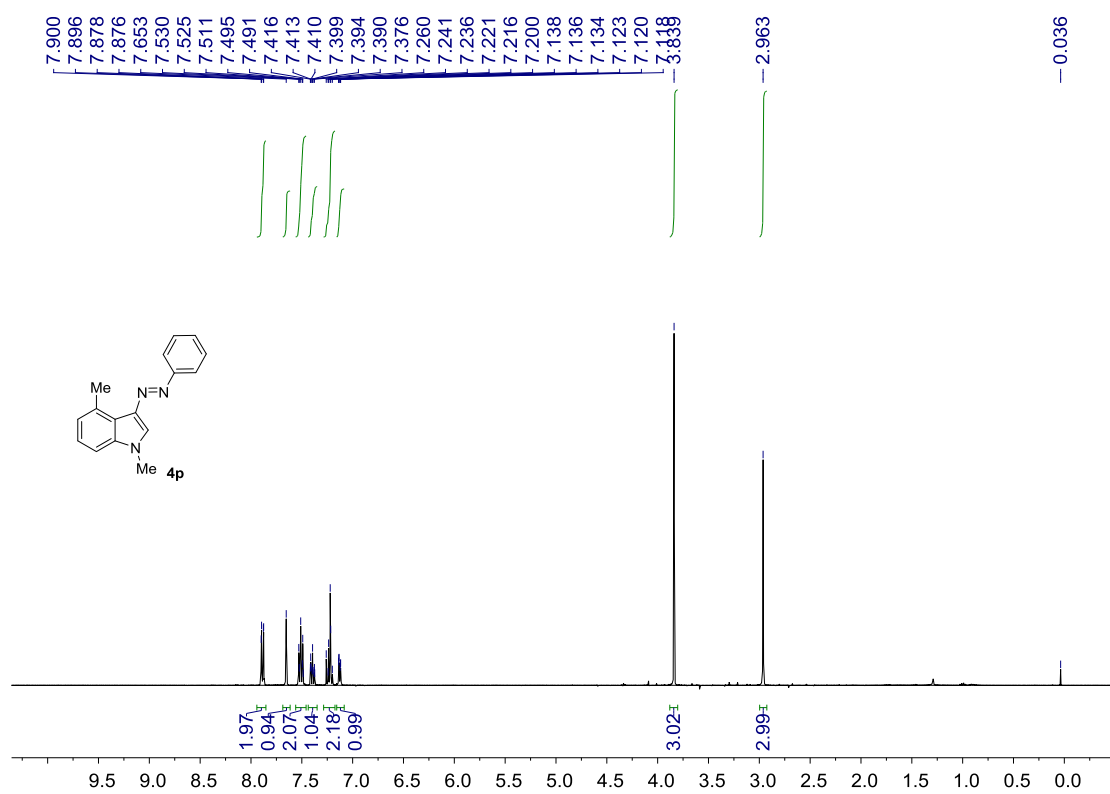

# <sup>13</sup>C NMR

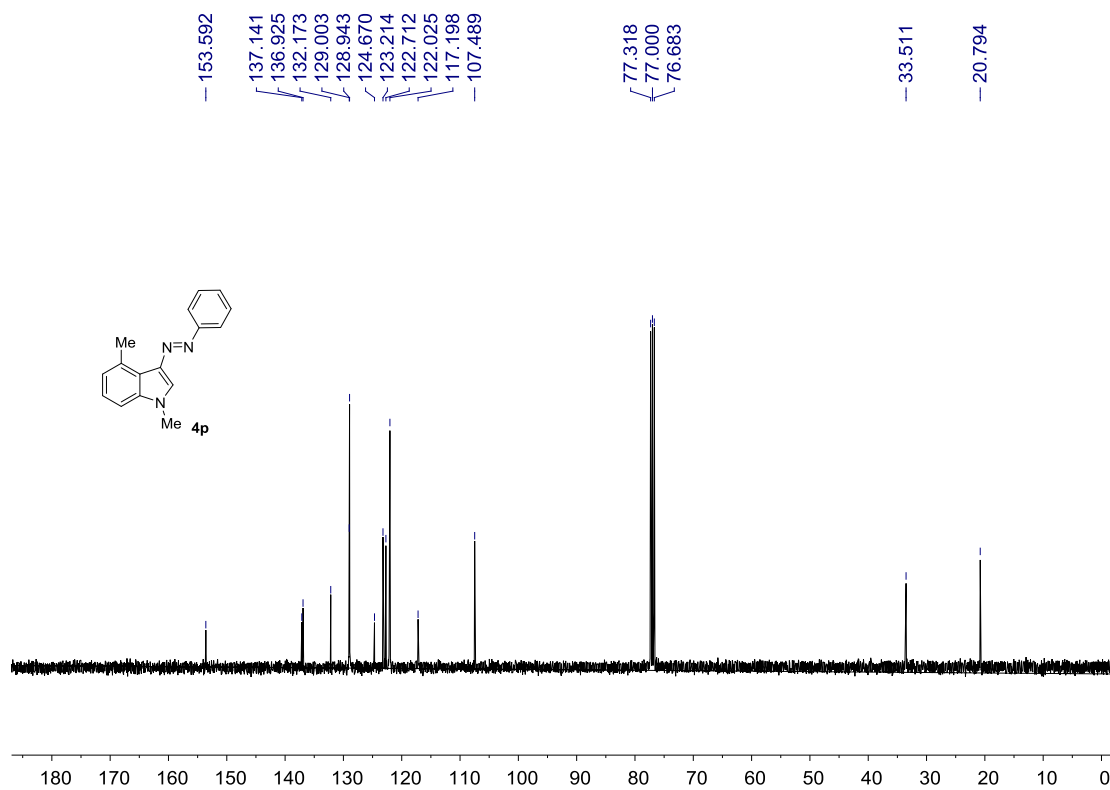

# <sup>1</sup>H NMR

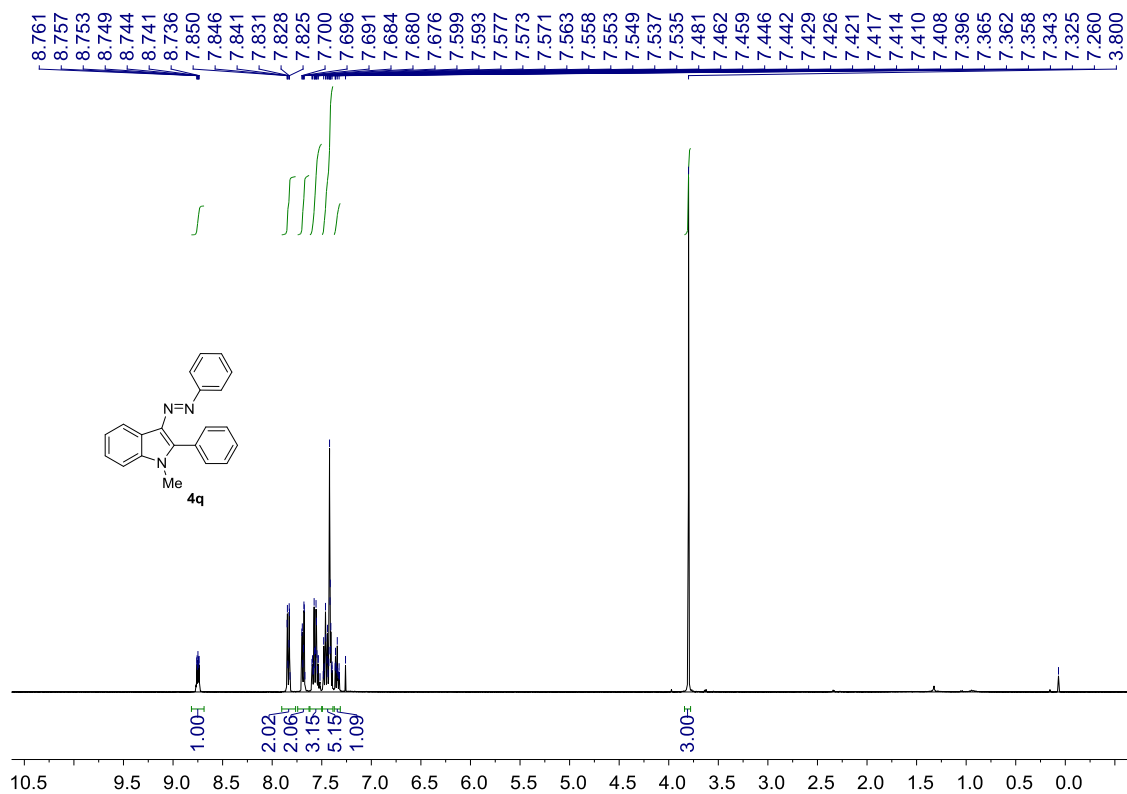

# <sup>13</sup>C NMR

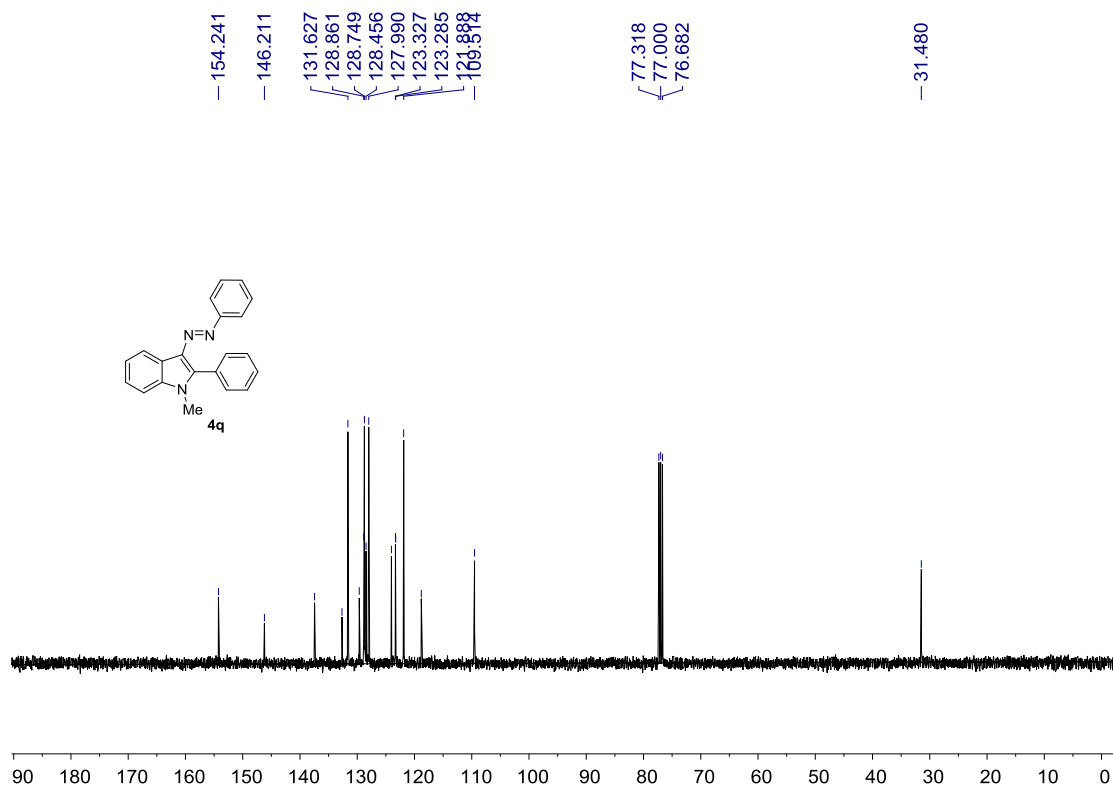

# <sup>1</sup>H NMR

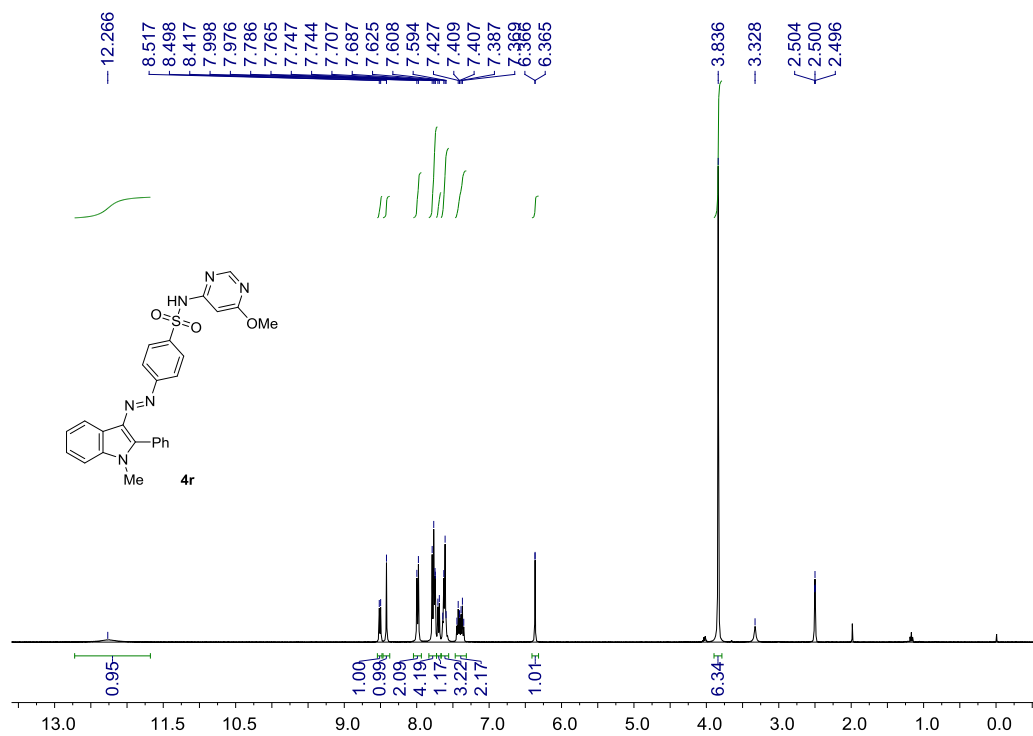

# <sup>13</sup>C NMR

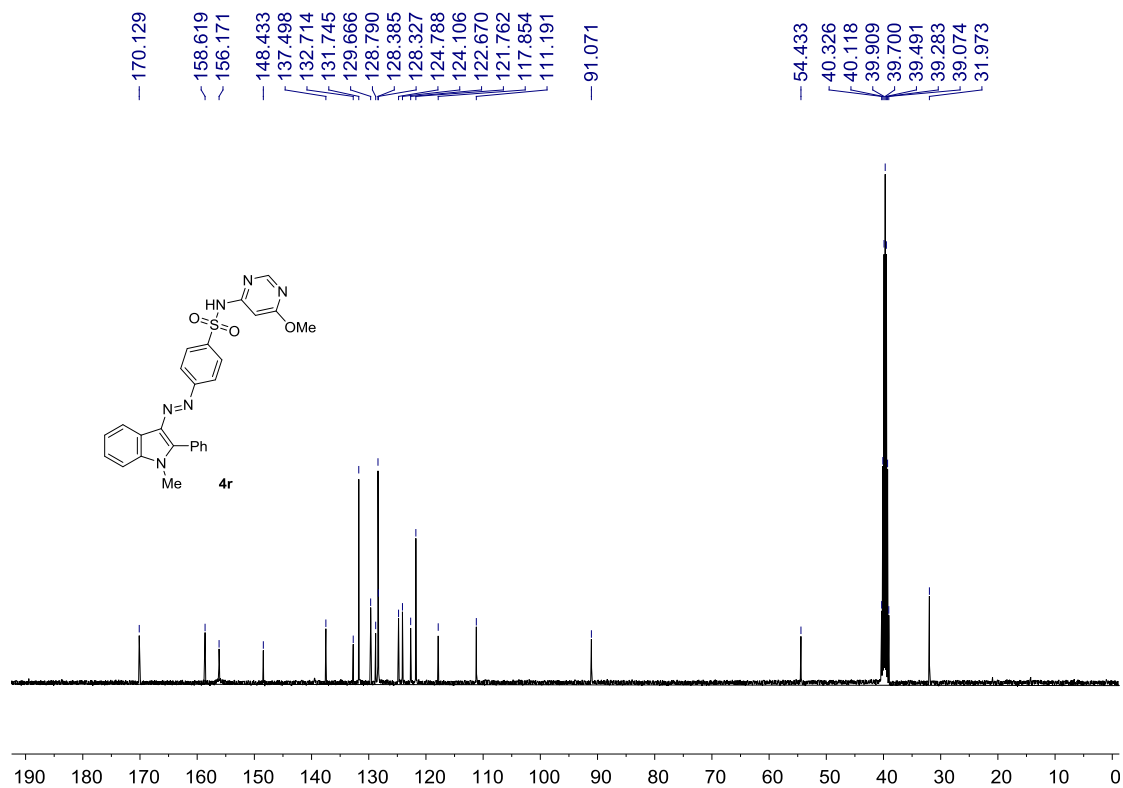

# <sup>1</sup>H NMR

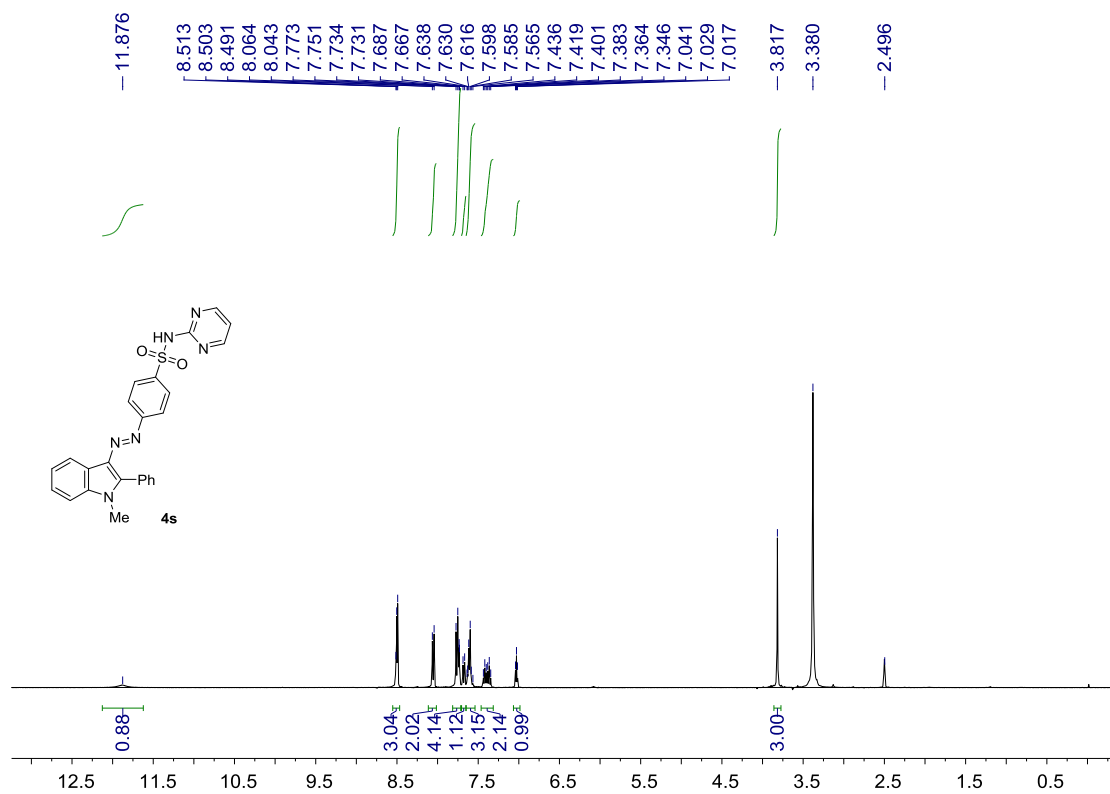

# <sup>13</sup>C NMR

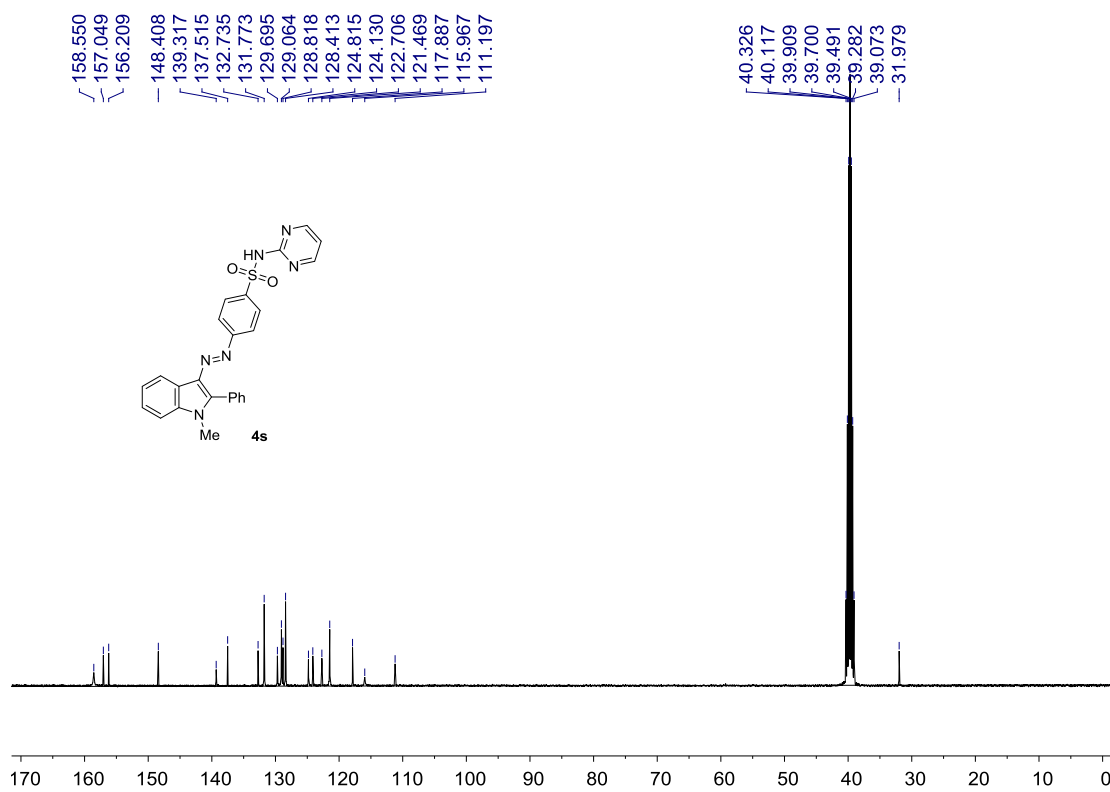

# <sup>1</sup>H NMR

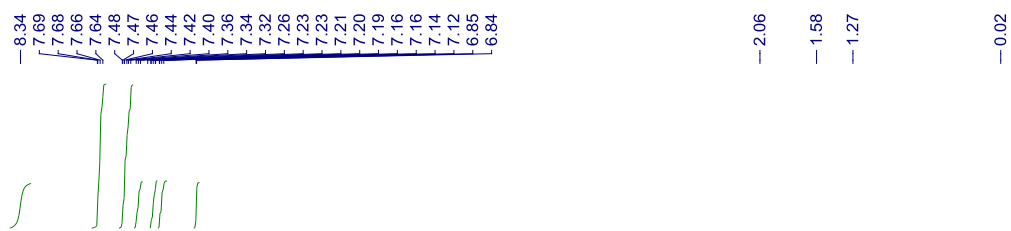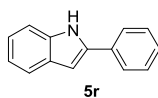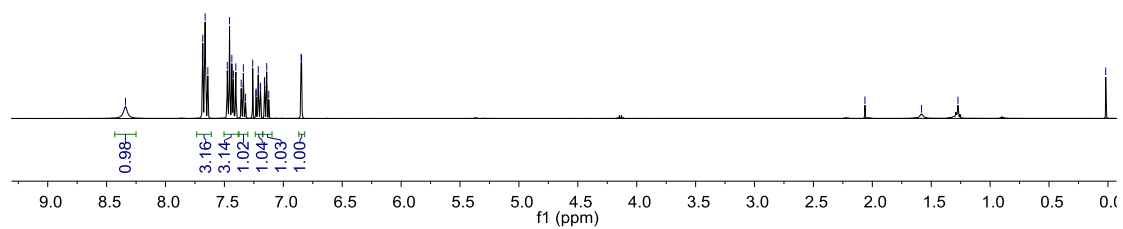

# <sup>13</sup>C NMR

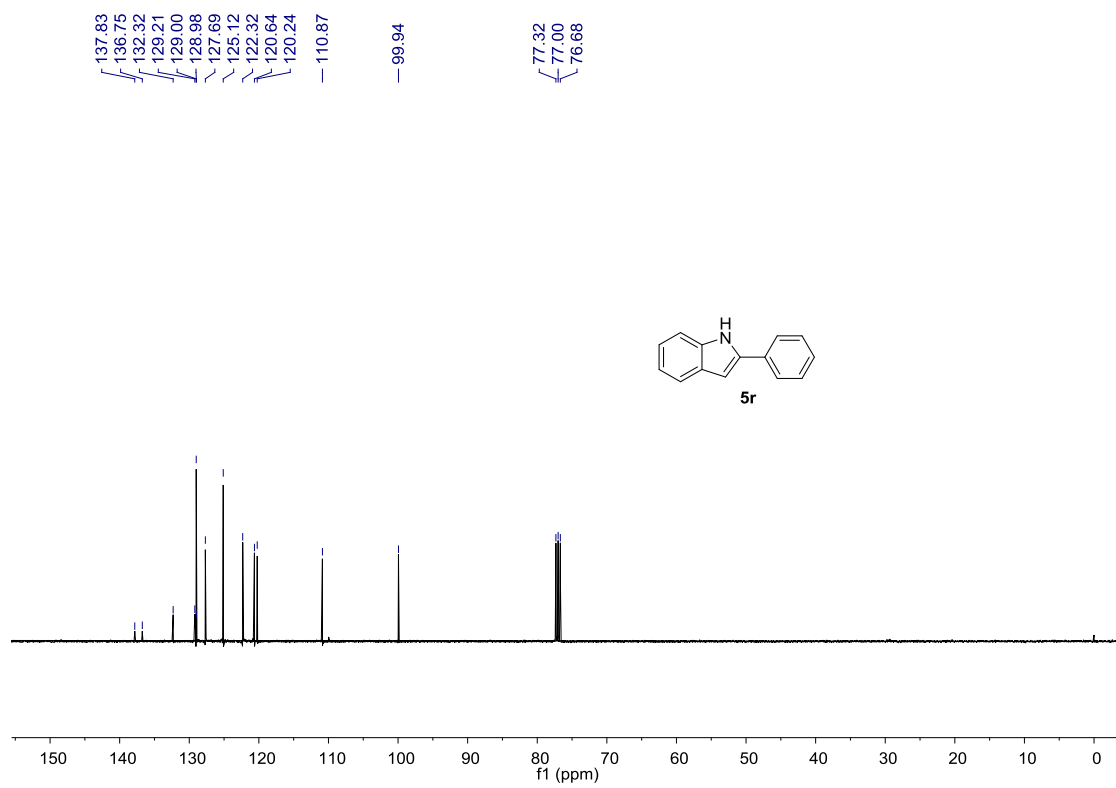

Supplement: c9nj01728c1.pdf [file c9nj01728c1.pdf]
